# Supplementary material for: Assessing beliefs and risk perceptions on smoking and smoking cessation in immigrant Chinese adult smokers residing in Vancouver, Canada: a cross-sectional study
Source: PubMed Central journal article supplement — BMJ Open. 2015 Feb 3;5(2):e006435. doi: 10.1136/bmjopen-2014-006435 (PMC4322197; doi:10.1136/bmjopen-2014-006435), 2015-02-03
Supplement: bmjopen-2014-006435.draft_revisions.pdf [file bmjopen-2014-006435.draft_revisions.pdf]

# BMJ Open

## Assessment of beliefs and risk perception about smoking and smoking cessation in Mandarin and Cantonese speaking adult smokers: Implications for intervention model

|                                 |                                                                                                                                                                                                                                                      |
|---------------------------------|------------------------------------------------------------------------------------------------------------------------------------------------------------------------------------------------------------------------------------------------------|
| Journal:                        | <i>BMJ Open</i>                                                                                                                                                                                                                                      |
| Manuscript ID:                  | bmjopen-2014-006435                                                                                                                                                                                                                                  |
| Article Type:                   | Research                                                                                                                                                                                                                                             |
| Date Submitted by the Author:   | 21-Aug-2014                                                                                                                                                                                                                                          |
| Complete List of Authors:       | FitzGerald, J Mark; University of British Columbia, Respiratory Medicine Division<br>Poureslami, Iraj; University of British Columbia, Respiratory Medicine Division<br>Shum, Jessica; University of British Columbia, Respiratory Medicine Division |
| <b>Primary Subject Heading</b>: | Smoking and tobacco                                                                                                                                                                                                                                  |
| Secondary Subject Heading:      | Smoking and tobacco                                                                                                                                                                                                                                  |
| Keywords:                       | Change management < HEALTH SERVICES ADMINISTRATION & MANAGEMENT, Organisation of health services < HEALTH SERVICES ADMINISTRATION & MANAGEMENT, Risk management < HEALTH SERVICES ADMINISTRATION & MANAGEMENT                                        |
|                                 |                                                                                                                                                                                                                                                      |

SCHOLARONE™  
Manuscripts

Only

1  
2  
3 **Title: Assessment of beliefs and risk perception about smoking and smoking cessation in**  
4 **Mandarin and Cantonese speaking adult smokers: Implications for intervention model**  
5  
6

7  
8 **Corresponding author:**

9 Dr. J. Mark FitzGerald  
10 The Lung Centre, 7<sup>th</sup> Floor  
11 Gordon and Leslie Diamond Health Care Centre  
12 2775 Laurel Street  
13 Vancouver, BC, Canada  
14 V5Z 1M9  
15 Email: [mark.fitzgerald@vch.ca](mailto:mark.fitzgerald@vch.ca)  
16 Phone: 604-875-4122  
17  
18  
19  
20  
21

22  
23 **Co-authors:**

24 Dr. Iraj Poureslami  
25 UBC, Faculty of Medicine, Respiratory Medicine Division  
26 Centre for Clinical Epidemiology and Evaluation (C2E2)  
27 Vancouver General Hospital – Research Pavilion  
28 716-828 West 10<sup>th</sup> Avenue  
29 Vancouver, BC, Canada  
30 V5Z 1M9  
31  
32  
33

34  
35  
36 Jessica Shum  
37 UBC, Faculty of Medicine, Respiratory Medicine Division  
38 Centre for Clinical Epidemiology and Evaluation (C2E2)  
39 Vancouver General Hospital – Research Pavilion  
40 828 West 10<sup>th</sup> Avenue  
41 Vancouver, BC, Canada  
42 V5Z 1M9  
43  
44  
45  
46  
47

48 **Keywords:** smoking, Chinese communities, beliefs, risk perceptions, smoking cessation  
49  
50

51 **Word count: 3255**  
52  
53  
54  
55  
56

**What this paper adds:**

1. Understanding the beliefs, perceptions, and practice of Chinese Mandarin and Cantonese communities about smoking and smoking cessation creates opportunities to tailor smoking cessation interventions according to the needs of these communities.
2. Previously, most studies have applied an identical risk perception model on smoking behaviour assessments among young vs. old and male vs. female smokers. However, our study identified that risk perception about smoking and smoking consequences differ in the smoking population group based on their age and gender. Therefore, a different model of risk perception should be designed and applied considering the age and gender of participants.
3. Despite existing knowledge that Chinese communities are heterogeneous, our study found that smoking habit, perceptions, beliefs, and practice differ in Mandarin speaking compared to Cantonese speaking Chinese.

**ABSTRACT**

**Objectives:** We explored cultural and belief contexts for smoking habits within Mandarin and Cantonese speaking communities. The aim was to identify their perceived barriers and facilitators to successful cessation. We attempted to translate existing knowledge and our previous experience in designing a conceptual framework to conduct culturally-based participatory research.

**Methods:** A mixed qualitative and quantitative approach was applied, involving community members, key-informants, and professionals in the design and implementation of the cross-sectional research. Three focus groups were conducted with 16 smokers from the target communities to assess their viewpoints on study framework and measurement tool.

**Results:** Participants were 167 current smokers, (137 males and 30 females) recruited with the help of community agencies and collaborating physicians. We assessed smoking patterns, beliefs, and perceptions and found a majority believed that smoking was harmful on their health. Younger smokers (<35 years of age) were more likely to not mind smoking in front of young children compared to older smokers ( $\geq 35$  years of age) ( $p < 0.001$ ). People with high school or lower levels of education believed that they would benefit more from smoking than suffering from withdrawal symptoms compared to the higher educated smokers ( $p < 0.05$ ). Mandarin speaking smokers were significantly more likely to encourage others to quit than Cantonese speaking smokers ( $p < 0.05$ ). In addition, many indicated not receiving adequate support from their care providers and lack of access to culturally and linguistically appropriate cessation programs preventing their attempt to quit smoking.

1  
2  
3 **Conclusion:** Our study highlighted the importance of tobacco control regulations for Mandarin  
4 and Cantonese speaking immigrants with limited access to healthcare information and for  
5  
6 younger smokers whose attention to health consequences of smoking may be limited as well.  
7  
8 Participants of this study were generally aware of the health risks and were willing to quit.  
9  
10  
11  
12  
13 Access to appropriate cessation programs would fulfill their willingness.  
14  
15  
16  
17  
18  
19  
20  
21  
22  
23  
24  
25  
26  
27  
28  
29  
30  
31  
32  
33  
34  
35  
36  
37  
38  
39  
40  
41  
42  
43  
44  
45  
46  
47  
48  
49  
50  
51  
52  
53  
54  
55  
56  
57  
58  
59  
60

For peer review only

## Article Summary

### Strengths and Limitations of this study

- We undertook a community-based participatory approach, with community key-informants and healthcare providers were heavily involved in all aspects of the study such as design, instrument development, implementation, community outreach, and dissemination. These key-stakeholders are important allies in developing culturally and linguistically appropriate smoking cessation interventions.
- Our study provides evidence that attitudes and beliefs of cigarette smoking differ between language, age, and gender groups. The differences with regards to tobacco smoking appear to be related to attitudes or knowledge.
- The results build a window of opportunity to promote tailored cessation interventions incorporating cultural beliefs, perceptions, and practices for Chinese immigrant communities.
- We used a convenience sampling method, which may not reflect the actual smoking prevalence and patterns of Chinese Mandarin and Cantonese immigrants in the Greater Vancouver Area.
- All responses were by self-report and validation of smoking behaviour or reasons to quit or continue smoking was not possible with a cross-sectional design.

## BACKGROUND

Tobacco use remains the leading cause of preventable morbidity and mortality in the world.[1-3] In Canada, its use has been declining slower than expected in spite of increased taxation on cigarettes and more stringent tobacco policies put into place.[3] In order to accomplish the goal of reducing the rate of smokers among Canadian adults, smoking has to be addressed among all sub-populations, especially those with a higher smoking prevalence than the general population. Global studies have shown that those who stop smoking greatly reduce their risk of developing cardio pulmonary disease and that in general the longer the period of cessation, the greater is the reduction in risk.[4,5] Minority and immigrant communities in Canada may be at greater risk of smoking-related illnesses.[6] Reasons include lack of knowledge and awareness about the link between smoking and lung disease;[7] limited access to smoking cessation programs due to cultural, language, and systemic barriers; [8] and smoking behaviour.[9,10] In addition, many immigrants from low-and-middle-income countries have significant exposure to biomass and bio-fuel as well as smoking which further increases their risk.[11] This is particularly true among immigrants from Mandarin and Cantonese speaking communities (the largest immigrant minority groups living in the BC and Canada)[12,13] where smoking rates remains high.[9,10] Such extensive tobacco use among immigrants may be due to the fact that smoking is a largely integrated into the Chinese male culture.[14] Nearly two of every three adult men in China are smokers.[15,16] It is, therefore, empirically relevant to try to understand this immigrant group's smoking knowledge, behaviour, and habits and develop culturally appropriate educational and counselling services to improve tobacco prevention attempts and promote cessation. Maximizing tobacco control for newcomers requires a special understanding of smoking pattern and beliefs of new immigrant populations. The purpose of this study was to explore smoking use patterns,

1  
2  
3 including beliefs, attitudes and behaviour among Mandarin and Cantonese speaking communities  
4  
5 living in the Greater Vancouver Area (GVA). We aimed to specifically identify and differentiate  
6  
7 the smoking perspectives between males and females, Mandarin and Cantonese, and between age  
8  
9 and education level groups. The identification of tobacco use and other related patterns that  
10  
11 would be identified here may help facilitate the development of community-based culturally  
12  
13 appropriate interventions targeting tobacco use and would be sensitive for Chinese immigrants in  
14  
15 future research.  
16  
17  
18  
19  
20  
21

## 22 **METHODS**

### 23 **Project Design**

24  
25 This multi-stage mixed methods study employed both qualitative and quantitative components  
26  
27 within an over-arching community-based participatory framework. The first stage comprised the  
28  
29 development and testing of a measurement instrument for the survey study. The second stage  
30  
31 was a quantitative study assessing smokers' knowledge, attitudes, beliefs, and smoking pattern.  
32  
33 The study was conducted between January 2013 and June 2014, allowing for participation and  
34  
35 collaboration between members of the Mandarin and Cantonese communities and other key-  
36  
37 stakeholders such as professionals and researchers in the research process.[17-19] Connections  
38  
39 and networking were built with community key-informants and community agencies (e.g.,  
40  
41 SUCCESS (United Chinese Community Enrichment Services Society), Vancouver Coastal  
42  
43 Health community organizations, etc.) supporting active involvement and contribution in study  
44  
45 design, development and implementation. Community collaborators provided assistance with  
46  
47 recruitment of Mandarin and Cantonese smokers as well as input and suggestions on the  
48  
49 development of focus group and interview questions. They recruited two males and two females  
50  
51  
52  
53  
54  
55  
56

---



1  
2  
3 who were members of the community, fluent in Mandarin and Cantonese, to work in alliance  
4  
5 with 4 female bilingual Chinese research assistants. All community facilitators and research  
6  
7 assistants received necessary training prior the study. The training included approaches on how  
8  
9 to best recruit study participants, understanding of the project's aims and objectives, how to  
10  
11 conduct focus groups and individual interviews with smokers from their own communities, and  
12  
13 ideas on how the team could work together effectively in collection of the best information  
14  
15 possible on Chinese smokers' beliefs, attitudes, and perspectives regarding smoking and  
16  
17 smoking cessation. The community researchers transcribed and translated focus group and  
18  
19 interview discussions and we applied the collected information in the development of a study  
20  
21 measurement tool and conceptual framework. In addition, findings from our previous qualitative  
22  
23 smoking study (conducted with smokers from the same communities) were used in the  
24  
25 development of the study design and measurement tool.[20]  
26  
27  
28  
29  
30  
31  
32  
33

### 34 **Ethics**

35  
36 Ethics approval was obtained for this study from the University of British Columbia Research  
37  
38 Ethics Board. All participants signed a written consent form in their preferred written language  
39  
40 (Chinese Simplified, Chinese Traditional, or English) translated by the bilingual researchers  
41  
42 which clearly explained study information, aims, and involvement prior to the study.  
43  
44  
45  
46  
47

### 48 **Study Measurement Tool**

49  
50 We initially developed the study measurement tool by determining whether any English or  
51  
52 Chinese language questionnaires were currently in use to assess attitudes and beliefs re smoking  
53  
54 in Chinese community. A literature search and an informal survey of immigrant-serving  
55  
56  
57

1  
2  
3 community agencies did not find any such instrument. Given the absence of a validated  
4  
5 assessment questionnaire in the target languages, a new measurement tool was developed over a  
6  
7 4-month period. Development of the study measurement tool began with information collected  
8  
9 from initial focus group sessions (n=3) and individual interviews (n=2), review of relevant  
10  
11 literature that addressed knowledge of, attitudes to, and behaviors in relation to tobacco use, and  
12  
13 also our previous smoking-related qualitative studies with Mandarin and Cantonese current and  
14  
15 ex-smokers.[20,21] Moreover, a professional measurement tool developer (a PhD in the research  
16  
17 and evaluation field from University of British Columbia) with expertise in developing mixed  
18  
19 open-ended and closed-format questionnaires was involved in the face and content validation and  
20  
21 finalization of the measurement tool.  
22  
23  
24  
25  
26  
27  
28

29 The final questionnaire covered current smoking knowledge, beliefs, and attitudes about  
30  
31 cigarettes, and exposure to smoking cessation aids. The tool included 70 questions covering  
32  
33 demographics and concepts on smoking onset, smoking characteristics, perceptions, experience  
34  
35 in quitting, social relationships, and cultural and environmental influences and were in the format  
36  
37 of yes/no, true/false, multiple choice, and open-ended questions (The study measurement tool may be found  
38  
39 in the Appendix). The questionnaire was also reviewed by a number of key-informants and health  
40  
41 practitioners (n=9) from the target communities who provided feedback and comments re the  
42  
43 questionnaire and checked its face and content validity. The bilingual Chinese research assistants  
44  
45 translated the study measurement tool to Chinese Simplified and Traditional formats and it was  
46  
47 then pilot tested with selected smokers and ex-smokers from the Chinese communities (n=5) to  
48  
49 further validate the measurement tool and for cultural relevance and clarification, as well as  
50  
51  
52  
53  
54  
55  
56  
57  
58  
59  
60

1  
2  
3 translation purposes including understandability, acceptability, and applicability, and suggestions  
4  
5 were revised accordingly.  
6  
7  
8  
9

### 10 **Participant Recruitment**

11 Eligibility criteria for participants were adults ( $\geq 21$  years old) who were current smokers  
12  
13 (defined by having smoked at least 5 cigarettes per day during the past 30 days), Chinese descent  
14  
15 (either Mandarin or Cantonese speaking) and be immigrants to Canada or children of  
16  
17 immigrants. Participants were recruited from within the communities using a variety of outreach  
18  
19 methods such as posting flyers and referral applied from previous studies and through network  
20  
21 with community agency collaborators.[17,22,23] In total, 16 Chinese smokers participated in  
22  
23 initial focus groups and interviews and 167 (137 males and 30 females) were interviewed, from  
24  
25 which 93 were Mandarin speaking and 73 were Cantonese speaking. 90 participants were  $< 35$   
26  
27 years of age and 76 were  $\geq 35$  years of age. Our targeted goal and objective was to assess  
28  
29 variations in 150 Chinese smokers' knowledge, beliefs, attitudes, and practices related to  
30  
31 smoking and experience in smoking cessation and we exceeded this aim.  
32  
33  
34  
35  
36  
37  
38  
39  
40

### 41 **Data Collection**

42 Data was collected through administration of study questionnaire and individual interviews.  
43  
44 Interview sessions were conducted at places and times of convenience for participants: e.g.,  
45  
46 participants' homes, community centres, and our research centre. Printed consent forms were  
47  
48 explained and signed preceding the interview. Data were collected from May 2013 through April  
49  
50 2014. Modest honoraria were paid to cover time, travel, and parking expenses. Community  
51  
52 research assistants conducted the interviews in Mandarin, Cantonese, or English and the  
53  
54  
55  
56

---

1  
2  
3 participants filled in a self reported Chinese Simplified, Chinese Traditional, or English  
4  
5 questionnaire while the research assistant was available to answer any questions that they would  
6  
7 have had. In some instances (e.g., old smokers or low literate people), the research assistants  
8  
9 administered the study questionnaire verbally while taking notes throughout the entire interview.  
10  
11  
12  
13

### 14 15 **Data analysis**

16  
17 SPSS v20 was used for all statistical tests. Descriptive statistical tests were used and the results  
18  
19 were presented in tables and graphs. Relevant inferential statistics were calculated for the entire  
20  
21 sample and stratified according to age, gender, level of education, language of origin, and  
22  
23 smoking patterns. The data were not normally distributed, and non-parametric tests were  
24  
25 therefore used (chi-square) test for nominal data, Mann–Whitney test for ordinal data with two  
26  
27 groups, and Kruskal–Wallis test for more than two groups with ordinal data. Binary logistic  
28  
29 regression was used to determine the effects of demographic variables on beliefs, attitudes,  
30  
31 knowledge and behaviour. All data were examined regarding distributions and trends in the data,  
32  
33 and the level of significance was set at the  $P < 0.05$  level.  
34  
35  
36  
37  
38  
39  
40

### 41 **Sample Size Calculation**

42  
43 With a total sample size of 167 subjects for the cross-sectional study, we estimated that we could  
44  
45 identify mean differences between different age, gender, language and education level groups  
46  
47 and with an effect size of 0.45 with 80% statistical power and a two-sided significance level of  
48  
49  $P < 0.05$ .  
50  
51  
52  
53  
54  
55  
56

## FINDINGS

We recruited and enrolled 167 current smokers in the GVA. **Table 1** describes characteristics of the study sample for both Mandarin (55.7%, n=93) and Cantonese (44.3%, n=74). The participants included predominately males (82%, n=137). The median age was 35 and we used this cut off point for younger/older groups, as used previously from our qualitative studies conducted with Chinese community smokers,[20] allowing us to identify these differences in perspective. 90 participants on the study were <35 years of age and 76 were 35 and older.

**Table 1. Participant characteristics**

|                             | N   | %    |
|-----------------------------|-----|------|
| <b>Gender</b>               |     |      |
| Male                        | 137 | 82   |
| Female                      | 30  | 18   |
| <b>Language</b>             |     |      |
| Mandarin                    | 93  | 55.7 |
| Cantonese                   | 74  | 44.3 |
| <b>Age</b>                  |     |      |
| <35                         | 90  | 54   |
| ≥35                         | 76  | 46   |
| <b>Education Level</b>      |     |      |
| High school under           | 87  | 52   |
| University degree and above | 80  | 48   |

### Smoking beliefs, perceptions, and attitudes

When asked the question of whether ‘*most people in my culture smoke*’, there was a significant difference at  $p < 0.05$  level between male and female participants; more males believed that smoking was a cultural habit in their community than females did. Similar findings were observed between Mandarin and Cantonese at  $p < 0.05$ ; more Mandarin said answered yes to the

1  
2  
3 question. Younger smokers (<35 years of age) were more likely to mention that they *'did not*  
4 *mind smoking in front of non-smokers'* compared to older smokers ( $\geq 35$  years of age). The mean  
5  
6 difference was significant at  $p < 0.05$ . When asked whether they minded smoking in front of  
7  
8 young children, similarly, younger smokers (<35 years of age) mentioned that they *'did not mind*  
9 *smoking in front of young children'* and the significant difference was at  $p = 0.005$ . When we  
10  
11 asked whether *'second and third hand smoke was as harmful as first hand smoke'*, again,  
12  
13 relatively more younger smokers (<35 years of age) compared to older smokers said no when  
14  
15 compared to older smokers ( $\geq 35$  years of age). The difference was significant at  $p < 0.05$ . We also  
16  
17 asked whether participants *'had a smoking routine/pattern'* and found that people with high  
18  
19 school or lower education mentioned they didn't have a routine/pattern compared to people with  
20  
21 higher education level at  $p < 0.05$ .  
22  
23  
24  
25  
26  
27  
28  
29  
30  
31

### 32 **Feeling when smoking**

33  
34 We asked if *'there is a different feeling when comparing times I smoke and don't smoke'*, and  
35  
36 found a statistically significant difference between male and female participants ( $\chi^2 = 4.237$ ;  $df =$   
37  
38  $1$ ,  $P < 0.05$ ). Significantly more males mentioned experiencing a different feeling when they  
39  
40 smoked compared to not smoking. In addition, younger smokers (<35 years of age) as well  
41  
42 claimed to have a different feeling when comparing times smoking and not smoking. The  
43  
44 differences between younger (<35 years of age) and older ( $\geq 35$  years of age) was statistically  
45  
46 significant ( $\chi^2 = 3.889$ ,  $df = 1$ ,  $P < 0.05$ ). No significant differences in this regard were identified  
47  
48 between Mandarin and Cantonese and highly educated (college/university and above) and lower  
49  
50 educated (high school or lower).  
51  
52  
53  
54  
55  
56  
57  
58  
59  
60

### Smoking cessation

More Mandarin speaking smokers answered yes to whether they *'would encourage others to quit'*, than Cantonese speaking smokers and the difference was significant at  $p < 0.05$ . As well, more Mandarin speaking smokers also mentioned that *'living in Canada influenced their smoking habits or desire to quit'*, compared to Cantonese speaking smokers at  $p < 0.05$ .

In addition, more people with high school or lower education agreed with the statement *'I would benefit more from smoking than suffering from withdrawal symptoms due to quitting'*, compared to the higher educated at  $p < 0.05$ . When asked whether they *'tried nicotine replacement therapy to quit smoking'*, more Mandarin speaking smokers mentioned that they had tried this aid to quit smoking compared to Cantonese speaking smokers and the difference was statistically significant at  $p = 0.008$ .

Many older participants mentioned that they had limited exposure to public sources of information on cessation services, developed in their native language. A few older smokers had received advice and information about the health issues attributed to smoking from their physicians. In general, participants indicated that they were not getting adequate support from their community, nor were aware of the resources that could have helped them quit, therefore lacked the decision making tools helping them to succeed their attempt.

### DISCUSSION

The main aim of this study was to gain insight into the psychosocial factors and the perceptions associated with smoking and smoking cessation among Chinese Cantonese and Mandarin speaking current smokers, taking into account culturally specific beliefs and practices. The

1  
2  
3 results have implications for the development of smoking cessation programs and educational  
4  
5 interventions for these immigrant groups.  
6  
7  
8  
9

10 Several participants in this study indicated their desire to quit and attempted to do so many times,  
11  
12 many of which did it relying on their own willpower and a few tried to quit due to health related  
13  
14 issues, mainly among older smokers. They mentioned that a better communication with primary  
15  
16 care providers and ease of access to culturally and linguistically appropriate smoking cessation  
17  
18 resources would promote smoking cessation in their communities. Similar findings were reported  
19  
20 in many immigrant communities in Canada who tried to quit smoking, as shown in different  
21  
22 local studies.[24-26] In addition to elucidating these barriers to smoking cessation and despite  
23  
24 continued smoking, participants showed being knowledgeable in health related and other  
25  
26 negative aspects of smoking. Firstly, most participants were not ignorant of the dangers of  
27  
28 smoking, with the vast majority recognizing that smoking posed risks to their own health and the  
29  
30 health of those around them. This knowledge is much higher than that of Chinese smokers who  
31  
32 were surveyed in China back to 2011, where only 36% of participants believed smoking can  
33  
34 cause lung cancer and only 4% of whom associated cigarettes with heart disease.[27] Secondly,  
35  
36 many of the smokers in our study already accepted limitations on the use of cigarettes in Canada,  
37  
38 and many supported restrictions on indoor smoking and also mentioned not smoking at home or  
39  
40 where children are presented. This practice is extremely important to reduce the risk of second-  
41  
42 hand and third-hand smoking and related health issues among young children and other non-  
43  
44 smoker family members.  
45  
46  
47  
48  
49  
50  
51  
52  
53  
54  
55  
56



1  
2  
3 In terms of reasons to continue smoking, perceived advantages of smoking such as ‘smoking  
4 does make me feel more comfortable’ and ‘smoking helps me to be stress-free when I have  
5 problems’ appeared to be more important factors to promote smoking continuation among our  
6 study participants than perceived disadvantages around ‘health issues’ and ‘money’ which shown  
7 to be strong motivators in quitting smoking in some studies.[28-30] For instance, health  
8 consequences and costs of smoking were not perceived as strong motivators to quit smoking  
9 among young participants. The disadvantages of quitting were perceived to outweigh its  
10 advantages were the main motives for continuing to smoke among older smokers, most of which  
11 showed low self-efficacy on being able to quit. Some reasons mentioned by older participants  
12 were: the addiction aspect of nicotine, being too late to quit, and their body needed nicotine. In  
13 other studies among mainstream populations, self-efficacy expectations and advantages of  
14 smoking cessation appeared to be the most important associates of quitting smoking among older  
15 smokers.[31,32] Therefore, this issue should be revisited in future studies with ethno-cultural  
16 communities. The results of this study suggest that understanding health beliefs and perceptions  
17 around smoking and improving self-efficacy are useful tools in promoting smoking cessation  
18 among smokers in Chinese immigrant communities.

### 43 **Limitations**

44 Some limitations need to be considered. First, this study used a convenience sample, so it may  
45 not reflect the actual smoking prevalence and patterns among Mandarin and Cantonese  
46 immigrants in the GVA. We could not explore the effect of acculturation on smoking habit and  
47 pattern. There was no previous data on smoking pattern among Chinese immigrants in Canada,  
48 and attempting a community based assessment would have been inherently difficult for an  
49  
50  
51  
52  
53  
54  
55  
56

1  
2  
3 exploratory study. Therefore the findings of this study cannot be generalized to larger Mandarin  
4 and Cantonese speaking communities residing in the GVA. The main aim was to explore the  
5 links to smoking cessation among Mandarin and Cantonese populations in order to gain insight  
6 into the need to adapt smoking cessation programs in these groups. In future research, a  
7 longitudinal design in which our results can be tested is recommended. A second limitation is the  
8 fact that all responses were by self-report and validation of smoking behaviour or reasons to quit  
9 or continue smoking was not possible with a cross-sectional design. A third limitation is the  
10 absence of a native mainstream (English-speaking) reference group, due to lack of resources.  
11 This could be a problem for interpreting the additional 'culturally specific' beliefs, because these  
12 were not elicited from mainstream population group. Nevertheless, to assess whether the beliefs  
13 we identified in this study are really 'culturally specific', a cohort study with all significant  
14 beliefs for main ethnic groups in the GVA, including mainstream population, might be useful.  
15  
16  
17  
18  
19  
20  
21  
22  
23  
24  
25  
26  
27  
28  
29  
30  
31  
32  
33

## 34 CONCLUSION

35  
36 The results of our study suggest that an effective anti-smoking campaign in the Chinese  
37 community should go beyond traditional English language efforts, utilize Chinese resources, and  
38 build upon existing cultural attitudes (such as the belief that smoking is inappropriate for young  
39 people) and knowledge (such as health risks) about smoking. Particular attention should be paid  
40 to differences between female and male smokers, an important issue that our sample size was not  
41 large enough to address. Also, future interventions can prove the applicability of a risk  
42 perception model on smoking cessation among Mandarin and Cantonese speaking smokers.  
43  
44  
45  
46  
47  
48  
49  
50  
51  
52  
53  
54  
55  
56  
57  
58  
59  
60

1  
2  
3 clients the importance of smoking prevention and cessation. Our study provides evidence that  
4 attitudes and beliefs of cigarette smoking differ between language, age, and gender groups. The  
5 differences with regard to tobacco smoking appear to be related to attitudes or knowledge. The  
6 findings build a window of opportunity to promote tailored cessation interventions incorporating  
7 cultural beliefs, perceptions, and practices for Chinese immigrant communities.  
8  
9  
10  
11  
12  
13  
14

### 17 **Practical Implications**

19 Despite the above mentioned limitations, the study has great significance in attracting the  
20 attention to the health disparities that Chinese immigrants in the GVA that have been in terms of  
21 higher prevalence of tobacco use in their homeland and diminished access to culturally and  
22 linguistically appropriate cessation aids. Interventions should take into consideration the specific  
23 profiles that Mandarin and Cantonese immigrants have in terms of the knowledge, attitudes, and  
24 beliefs on their smoking habits and patterns. Given the results of this study, we can conduct  
25 further research to assess the applicability of a risk perception model to the smoking behavior of  
26 routine smokers in the target immigrant communities. The model has been shown effective in  
27 terms of modifying risk-taking behaviours, promoting positive perceptions, and improving self-  
28 efficacy that have been applied for changing smoking habits/behaviour among participants in  
29 different studies.[33-35]  
30  
31  
32  
33  
34  
35  
36  
37  
38  
39  
40  
41  
42  
43  
44  
45  
46  
47  
48  
49  
50  
51  
52  
53  
54  
55  
56  
57

## ACKNOWLEDGEMENTS

We would like to thank the community members, facilitators, ethno-cultural serving agencies (SUCCESS), and key-informants from the Mandarin and Cantonese communities in the Greater Vancouver Area who helped us since the initial steps of this research.

## FUNDING

This project was funded by a community grant from The Vancouver Foundation, Vancouver, Canada.

## COMPETING INTERESTS

We declare that there is no conflict of interest in terms of ownership of shares, consultancy, speaker's honoraria or research grants from commercial companies or professional or governmental organizations with an interest in the topic of the paper (the ICMJE form for Disclosure of Potential Conflicts of Interest from the Corresponding Author is also attached to this submission).

## CONTRIBUTOR STATEMENT

JMF and IP planned the conception and study design. IP prepared the proposal draft to the funding agency and applied for the ethics approval. JS coordinated the study, recruited participants, and facilitated the community involvement. IP analyzed and interpreted the study data. IP and JS drafted the manuscript for important intellectual content.

## DATA SHARING STATEMENT

No additional data available.

1  
2  
3  
4  
5  
6  
7  
8  
9  
10  
11  
12  
13  
14  
15  
16  
17  
18  
19  
20  
21  
22  
23  
24  
25  
26  
27  
28  
29  
30  
31  
32  
33  
34  
35  
36  
37  
38  
39  
40  
41  
42  
43  
44  
45  
46  
47  
48  
49  
50  
51  
52  
53  
54  
55  
56  
57  
58  
59  
60  
**REFERENCE LIST**

1. Centers for Disease Control and Prevention. Tobacco Use. 2012. Available from:  
<http://www.cdc.gov/chronicdisease/resources/publications/aag/osh.htm> Accessed on June 20, 2014.
2. World Health Organization. Tobacco Free Initiative (TFI). 2014. Available from:  
[http://www.who.int/tobacco/health\\_priority/en/](http://www.who.int/tobacco/health_priority/en/) Accessed on June 18, 2014.
3. Haddad L, El-Shahawy O, Shishani K, et al. Cigarette use attitudes and effects of acculturation among Arab immigrants in USA: A preliminary study. *Health* 2012;4(10):785-793.
4. Robles GI, Singh-Franco D, & Ghin HL. A review of the efficacy of smoking-cessation pharmacotherapies in nonwhite populations. *Clin Ther* 2008;30(5):800-12.
5. Okuyemi K, Nollen N, & Ahluwalia J. Interventions to Facilitate Smoking Cessation. *Am Fam Physician* 2006;74(2):262-271.
6. Health Canada. Canadian Tobacco Use Monitoring Survey (CTUMS) 2010. 2010. Available at [http://www.hc-sc.gc.ca/hc-ps/tobac-tabac/research-recherche/stat/ctums-esutc\\_2010\\_graph-eng.php](http://www.hc-sc.gc.ca/hc-ps/tobac-tabac/research-recherche/stat/ctums-esutc_2010_graph-eng.php) Accessed on July 2, 2014.
7. Yan J, Xiao S, Ouyang D, et al. Smoking behavior, knowledge, attitudes and practice among health care providers in Changsha city, China. *Nicotine Tob Res* 2008; 10: 737-744.
8. Wu D, Ma GX, Zhou K, et al. The effect of a culturally tailored smoking cessation for Chinese American smokers. *Nicotine Tob Res* 2009;11(12):1448-1457.
9. Chen W. *Susceptibility to Smoking Among Chinese-Canadian Non-smoking Adolescents*. Doctoral Dissertation, University of British Columbia. 2008. Available at

1  
2  
3 [https://circle.ubc.ca/bitstream/handle/2429/942/ubc\\_2008\\_fall\\_chen\\_weihong.pdf?sequence=1](https://circle.ubc.ca/bitstream/handle/2429/942/ubc_2008_fall_chen_weihong.pdf?sequence=1) Accessed on July 2, 2014.  
4  
5  
6  
7

- 8 **10.** Yang G, Ma J, Liu N, et al. Smoking and passive smoking in Chinese - 2002.  
9  
10 *Zhonghua Liu Xing Bing Xue Za Zhi* 2005;26:77-83.  
11  
12 **11.** Ksal H, Sayg A, Sarıman N, et al. Evaluation of Clinical and Functional Parameters in  
13 Female Subjects With Biomass Smoke Exposure. *Respir Care* 2013;58(3):424-430.  
14  
15 **12.** Statistics Canada. Some facts about the demographic and ethnocultural composition of  
16 the population. 2008. Available at [http://www.statcan.gc.ca/pub/91-003-](http://www.statcan.gc.ca/pub/91-003-x/2007001/4129904-eng.htm#2)  
17 [x/2007001/4129904-eng.htm#2](http://www.statcan.gc.ca/pub/91-003-x/2007001/4129904-eng.htm#2) Accessed on July 2, 2014.  
18  
19  
20  
21  
22  
23 **13.** BC Statistics. Population Estimates - Total Populations. 2010. Available at:  
24 <http://www.bcstats.gov.bc.ca/data/pop/pop/estspop.asp#totpop> Accessed on July 2, 2014.  
25  
26  
27  
28 **14.** Zeng XX, Chiu CH, Sun J, et al. A Phone-Counseling Smoking-Cessation Intervention  
29 for Male Chinese Restaurant Workers. *J Commun Health* 2010(3):1-12.  
30  
31  
32  
33 **15.** Gallup World. Three in 10 Chinese Adults Smoke. 2012. Available at:  
34 <http://www.gallup.com/poll/152546/three-chinese-adults-smoke.aspx> Accessed on July 2,  
35  
36  
37  
38  
39  
40  
41  
42  
43  
44  
45  
46  
47  
48  
49  
50  
51  
52  
53  
54  
55  
56  
57  
58  
59  
60
- 
17. Poureslami I, Doyle-Waters MMR, Nimmon L, et al. Hearing the community voice: methodological issues in developing asthma self-management educational materials for immigrant communities. In Agyemang C, Airhihenbuwa CO, de-Graft Aikins A (eds.),

1  
2  
3  
4  
5  
6  
7  
8  
9  
10  
11  
12  
13  
14  
15  
16  
17  
18  
19  
20  
21  
22  
23  
24  
25  
26  
27  
28  
29  
30  
31  
32  
33  
34  
35  
36  
37  
38  
39  
40  
41  
42  
43  
44  
45  
46  
47  
48  
49  
50  
51  
52  
53  
54  
55  
56  
57  
58  
59  
60

*Ethnicity: Theories, International Perspectives and Challenges*. Hauppauge NY: Nova Publishers 2014:125-156.

18. Faridi Z, Grunbaum JA, Gray BS, et al. 2007. Community-based participatory research: necessary next steps. *Prev Chronic Dis*. Available at: [http://www.cdc.gov/pcd/issues/2007/jul/06\\_0182.htm](http://www.cdc.gov/pcd/issues/2007/jul/06_0182.htm) Accessed on June 21, 2014.
19. Israel BA, Schulz AJ, Parker EA, et al. Review of community-based research: assessing partnership approaches to improve public. *Annu.Rev.Public Health*.1998;19:173–202.
20. Poureslami I, Shum J, Cheng N, et al. Does Culture or Illness Change a Smoker’s Perspective on Cessation? *Am J Health Behav* 2014;38(5):33-39.
21. Poureslami I, Shum J, & FitzGerald JM. Differences in attitudes and beliefs about smoking among smoker and ex-smoker COPD patients. *J Health Care Poor* 2014 (Under review).
22. Poureslami I, Rootman I, Doyle-Water MMR, et al. Health literacy, language, and ethnicity-related factors in newcomer asthma patients to Canada: a qualitative study. *J Immigr Minor Health*.2011;13(2):315-322.
23. Klassen AF, Gulati S, Watt L, et al. Immigrant to Canada, newcomer to childhood cancer: a qualitative study of challenges faced by immigrant parents. *Psycho-oncol* 2012;21(5):558-562.
24. Dawson AP, Cargo M, Stewart H, et al. Aboriginal Health Workers experience multilevel barriers to quitting smoking: a qualitative study. *Int J Equity Health* 2012;11: 27.
25. North American Quitline Consortium (NAQC). The Use of Quitlines among Priority

1  
2  
3 Populations in the U.S.: Lessons from the Scientific Evidence. 2011. Available at:  
4  
5 [http://c.ymcdn.com/sites/www.naquitline.org/resource/resmgr/Issue\\_Papers/IssuePaperT](http://c.ymcdn.com/sites/www.naquitline.org/resource/resmgr/Issue_Papers/IssuePaperTheUseofQuitlinesA.pdf)  
6  
7 [heUseofQuitlinesA.pdf](http://c.ymcdn.com/sites/www.naquitline.org/resource/resmgr/Issue_Papers/IssuePaperTheUseofQuitlinesA.pdf) Accessed on July 15, 2014.  
8  
9

10 **26.** Maryland Department of Health and Mental Hygiene. Exploring cultural, psychosocial,  
11 and environmental factors influencing tobacco use among Asian Americans, Hispanics,  
12 African Americans and American Indians in Maryland. Cigarette Restitution Fund's  
13 Tobacco Use Prevention and Cessation Program. 2008. Available at:  
14  
15 [https://sph.umd.edu/epib/cultural\\_competency/Exploring%20cultural,%20psychosocial,](https://sph.umd.edu/epib/cultural_competency/Exploring%20cultural,%20psychosocial,%20and%20environmental%20factors%20influencing%20tobacco%20use%20among%20Asian%20Americans,%20Hispanics,%20African%20Americans%20and%20American%20Indians%20in%20Maryland.pdf)  
16  
17 [%20and%20environmental%20factors%20influencing%20tobacco%20use%20among%2](https://sph.umd.edu/epib/cultural_competency/Exploring%20cultural,%20psychosocial,%20and%20environmental%20factors%20influencing%20tobacco%20use%20among%20Asian%20Americans,%20Hispanics,%20African%20Americans%20and%20American%20Indians%20in%20Maryland.pdf)  
18  
19 [0Asian%20Americans,%20Hispanics,%20African%20Americans%20and%20American](https://sph.umd.edu/epib/cultural_competency/Exploring%20cultural,%20psychosocial,%20and%20environmental%20factors%20influencing%20tobacco%20use%20among%20Asian%20Americans,%20Hispanics,%20African%20Americans%20and%20American%20Indians%20in%20Maryland.pdf)  
20  
21 [%20Indians%20in%20Maryland.pdf](https://sph.umd.edu/epib/cultural_competency/Exploring%20cultural,%20psychosocial,%20and%20environmental%20factors%20influencing%20tobacco%20use%20among%20Asian%20Americans,%20Hispanics,%20African%20Americans%20and%20American%20Indians%20in%20Maryland.pdf) Accessed on July 15, 2014.  
22  
23  
24  
25  
26  
27  
28

29 **27.** Yang J, Hammond D, Driezen P, et al. Health knowledge and perception of risks among  
30 Chinese smokers and non-smokers: Findings from the Wave 1 ITC China Survey. *Tob*  
31  
32 *Control* 2010;19(Supplement 2):i18-i23.  
33  
34  
35

36 **28.** Roddy E, Antoniak M, Britton J, et al. Barriers and motivators to gaining access to  
37 smoking cessation services amongst deprived smokers – a qualitative study. *BMC Health*  
38  
39 *Services Research* 2006;6:147-154.  
40  
41  
42

43 **29.** Litmus research organization. Quitting Motivations and Barriers Qualitative Research.  
44 The Quit Group. 2005. Available at:  
45  
46 [http://www.quit.org.nz/file/research/FINAL%20Litmus%20report-](http://www.quit.org.nz/file/research/FINAL%20Litmus%20report-Quitting%20Motivations%20and%20Barriers.pdf)  
47  
48 [Quitting%20Motivations%20and%20Barriers.pdf](http://www.quit.org.nz/file/research/FINAL%20Litmus%20report-Quitting%20Motivations%20and%20Barriers.pdf) Accessed on July 15, 2014.  
49  
50  
51  
52

53 **30.** Richardson K. Smoking, Low Income and Health Inequalities: Thematic Discussion  
54 Document. Action on Smoking and Health and the Health Development Agency. 2001.  
55  
56



1  
2  
3 Available at: [http://www.ash.org.uk/files/documents/ASH\\_86.pdf](http://www.ash.org.uk/files/documents/ASH_86.pdf) Accessed on July 15,  
4  
5  
6 2014.

- 7  
8 **31.** Gwaltney CJ, Metrik J, Kahler CW, Shiffman S. Self-Efficacy and Smoking Cessation: A  
9  
10 Meta-Analysis. *Psychol Addict Behav* 2009;23(1):1-20.  
11  
12 **32.** Dijkstra A, & De Vries H. Self-efficacy expectations with regard to different tasks in  
13  
14 smoking cessation. *Psychol Health* 2000;15(4):501-511.  
15  
16  
17 **33.** Song AV, Morrell HE, Cornell JL, et al. Perceptions of Smoking-Related Risks and  
18  
19 Benefits as Predictors of Adolescent Smoking Initiation. *Am J Public Health*  
20  
21 2009;99(3):487-492.  
22  
23  
24 **34.** Aryal UR, Petzold M, & Krettek A. Perceived risks and benefits of cigarette smoking  
25  
26 among Nepalese adolescents: a population-based cross-sectional study. *BMC Public*  
27  
28 *Health* 2013,13:187-196.  
29  
30  
31 **35.** Harris JK, Karamelic-Muratovic A, Herbers SH, et al. Perceptions of Personal Risk  
32  
33 About Smoking and Health Among Bosnian Refugees Living in The United States. *J*  
34  
35 *Immigrant Minority Health* 2012;14(3):413-919.  
36  
37  
38  
39  
40  
41  
42  
43  
44  
45  
46  
47  
48  
49  
50  
51  
52  
53  
54  
55  
56  
57  
58  
59  
60

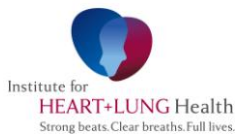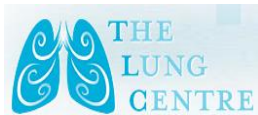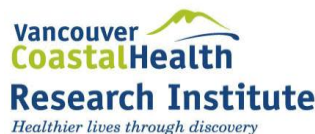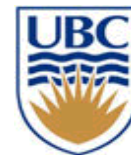

**The effect of a multi-dimensional smoking cessation intervention on Mandarin and Cantonese-speaking immigrants residing in the Greater Vancouver Area: A community-based program**

Please respond to the following questions:

**A. All about you**

**1. What is your gender?**

- Male  Female

**2. What is your age?**

- 21-25 years old  
 26-35 years old  
 36-45 years old  
 46-55 years old  
 56 years old and above

**3. Which language(s) do you speak most with your friends, family, or co-workers?**

- Mandarin  
 Cantonese  
 English  
 Others, please specify \_\_\_\_\_

**4. What is your marital status?**

- Single, never married  
 Married  
 Living under common-law  
 Divorced  
 Widowed/Living alone

**5. What is your highest level of education?**

- Never attended school  
 Elementary school  
 High school  
 University degree  
 University degree and above  
 Others, please specify \_\_\_\_\_

**6. What is your current employment status?**

- I am a student  
 I am employed  
 I am self-employed  
 I am unemployed  
 I am retired

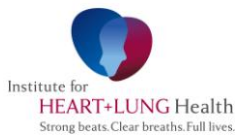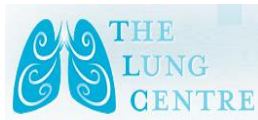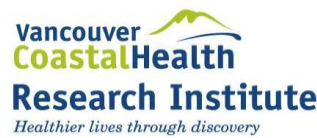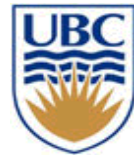

## B. Smoking onset questions

### 1. At what age did you start smoking?

- Under 18 years old  
 19-25 years old  
 26-39 years old  
 40 years old and older

### 2. Why did you start smoking? (Choose all that are applicable to you and explain)

- Social factors, please specify \_\_\_\_\_

- Emotional factors, please specify \_\_\_\_\_

- Environmental factors, please specify \_\_\_\_\_

- Others, please specify \_\_\_\_\_

### 3. At the time you started smoking, did somebody in your social network smoke?

(Choose all that are applicable to you)

- None or Not applicable  
 Family, who, please specify \_\_\_\_\_  
 Colleagues, from where, please specify \_\_\_\_\_  
 Friends  
 Classmates, at what age, please specify \_\_\_\_\_  
 Others, please specify \_\_\_\_\_

### 4. At the time you started smoking, did somebody tell you about the health problems smoking a cigarette can cause?

(Choose all that are applicable to you)

- None or Not applicable  
 Family, who, please specify \_\_\_\_\_  
 Colleagues  
 Friends  
 Classmates, at what age, please specify \_\_\_\_\_  
 Media  
 Health professionals  
 Others, please specify \_\_\_\_\_

### 5. At the time you started smoking, did you know the side effects of smoking?

- Yes       No

**If yes, which one(s) did you know?**

- Makes teeth yellow  
 Causes wrinkles

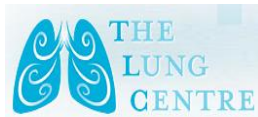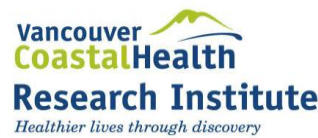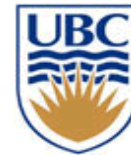

- Makes smokers smell bad
- Causes more phlegm
- Shortness of breath
- Causes bad breath
- Cough
- Increased risk of lung cancer
- Greater risk of heart disease
- Others, please specify \_\_\_\_\_

**6. Why did you become a regular smoker?**

**(Choose all that are applicable to you)**

- I have never been a regular smoker (**After choosing, please skip to question 7**)
- I craved cigarettes if I didn't smoke regularly
- I was around smokers a lot of time
- I found smoking pleasurable
- I enjoy the taste
- Smoking relaxed me
- Smoking helped me focus and concentrate better
- Smoking helped me feel less stressed
- I smoke to fit in with other people
- I like the image of a smoker
- Smoking helped me control my weight
- Since others in my family smoked, it was easy to see myself as a smoker too
- Others, please specify \_\_\_\_\_

**7. If you are not a regular smoker, why didn't you become a regular smoker?**

**(Choose all that are applicable to you)**

- I did not enjoy smoking
- Smoking cigarettes made me feel sick
- I did not like the taste and/ or the smell of cigarettes
- I did not want to become addicted to cigarettes
- I was concerned about the effects of smoking on my health
- I was concerned about the effects of smoking on the health of the people around me
- I don't hang out with people who are smokers that often
- I was encouraged to stop smoking by my friends
- I was encouraged to stop smoking by an adult such as my parents/ guardians, a teacher, or a doctor
- I did not like the image of being a smoker
- It was hard for me to obtain cigarettes
- Cigarettes are expensive
- I had trouble finding places to smoke
- Since I grew up in a non-smoking family, I just could not see myself as a smoker
- I don't want people to know that I smoke
- Others, please specify \_\_\_\_\_

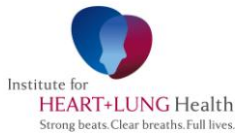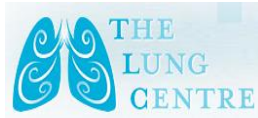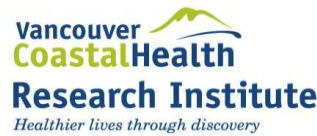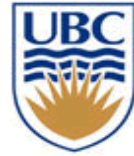

**C. Which characteristic best describes you as a smoker?**

**1. How much do you smoke now per day?**

# Packs \_\_\_\_\_ or # Cigarettes \_\_\_\_\_

**2. How much do you spend weekly on buying cigarettes?**

- Under \$25/week  
 \$25-50/week  
 \$50-75/week  
 \$75-100/week  
 \$101+/week

**3. I have a smoking routine/pattern.**

- True     False     Not sure

**4. I smoke**

**(Choose all that are applicable to you)**

- When I am bored  
 When I am upset  
 When I am having a break  
 When I am partying  
 When I am driving  
 When I am under stress  
 When I am with friends  
 When I am alone  
 When I am in a social gathering  
 Mostly at home  
 At work or at school  
 When I have alcohol  
 First thing when I wake up  
 Mostly in the morning  
 Mostly in the afternoon  
 At night before I head to bed  
 After every meal  
 After every tea or coffee  
 During every phone conversation  
 Before I go to the washroom  
 Before I head to work on an assignment/task  
 After I finish an assignment/task  
 When I want to relax  
 Others, please specify \_\_\_\_\_

**5. There is a different feeling when comparing times I smoke and don't smoke.**

- True     False     Not sure     Depends on the situation, please explain \_\_\_\_\_

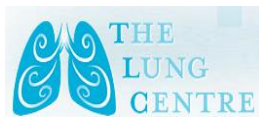

1  
2  
3  
4  
5  
6  
7  
8  
9  
10  
11  
12  
13  
14  
15  
16  
17  
18  
19  
20  
21  
22  
23  
24  
25  
26  
27  
28  
29  
30  
31  
32  
33  
34  
35  
36  
37  
38  
39  
40  
41  
42  
43  
44  
45  
46  
47  
48  
49  
50  
51  
52  
53  
54  
55  
56  
57  
58  
59  
60

**6. What are the things you like about smoking?**

**(Choose all that are applicable to you)**

- It helps me to relax
- It helps to break up my working time
- It helps me to cope with stress
- It keeps me busy when I am bored
- I just enjoy it
- It is something I have in common with my friends or family
- It stops me from putting on weight

**7. What are the things you don't like about your smoking?**

- I don't have anything that I dislike about smoking
- It is expensive
- It affects my health
- I don't like feeling dependent on cigarettes
- It makes my clothes and breath smell
- It is a bad example for children
- It is unpleasant for people near me
- It makes me less fit
- People put a negative image on me
- It is bad for the health of people near me

**8. Certain situations trigger me to smoke**

- True     False     Not sure

**If true, what are the situations?**

- Happiness/ Joy
- Relaxed
- Social gathering
- Receive bad news
- Receive good news
- Stress
- Frustration
- Boredom
- Loneliness
- Anger
- Sadness
- Lost concentration
- Wanting to be like others (e.g., friends, members of my group)
- Other, please specify \_\_\_\_\_

**9. Where do you smoke mostly?**

- Indoors
- Porch/outside of home
- Outside
- Workplace
- In the car
- Others, please specify \_\_\_\_\_

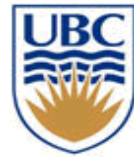

#### D. Your perception about the following statement

**1. Smoking kills germs and bacteria.**

True     False     Not sure

**2. My body needs nicotine.**

True     False     Not sure

**3. Smoking is an addiction.**

True     False     Not sure

**4. Smoking is cool.**

True     False     Not sure

**5. Smoking has changed my daily routine (work, study, exercise, food intake, and sleep).**

True     False     Not sure

**If true, how has it changed your daily routine?**

---

**6. Smoking has affected my health (i.e., lung disease, coughing, phlegm, cancer, shortness of breath, heart disease, blood pressure, energy, wrinkles, asthma)?**

True     False     Not sure

**If true, how has it affected your health?**

---

**7. There are health-related problems I'm worried about while I smoke.**

True     False     Not sure

**If true, what are they?**

Lung disease

Shortness of breath

Cough

Cancer

Heart disease

Change in blood pressure

Less energized

Dependence on medication intake

Decrease in oxygen intake

Wrinkles

Early death

Others, please specify \_\_\_\_\_

**8. What do you think are the advantages of you smoking cigarettes?**

---

**9. What do you think are the disadvantages of you smoking cigarettes?**

---

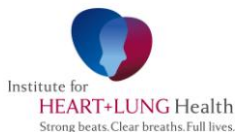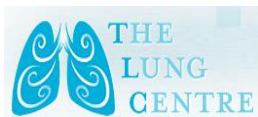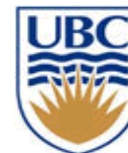

1  
2  
3  
4  
5  
6  
7  
8  
9  
10  
11  
12  
13  
14  
15  
16  
17  
18  
19  
20  
21  
22  
23  
24  
25  
26  
27  
28  
29  
30  
31  
32  
33  
34  
35  
36  
37  
38  
39  
40  
41  
42  
43  
44  
45  
46  
47  
48  
49  
50  
51  
52  
53  
54  
55  
56  
57  
58  
59  
60

**10. Do you have any other feelings about you smoking cigarettes?**

---

**E. Your experience and thoughts on quitting and quitting methods**

**1. I was nagged by someone to quit smoking.**

True  False

**If true, who nagged you?**

---

**2. I have gone to the doctor for symptoms related to my lungs.**

True  False  Not related to my smoking

**3. I have had a lung examination at the physician's office or hospital.**

True  False  Not related to my smoking

**4. I have tried to quit before.**

True  False

**If true, how many times have you tried?** \_\_\_\_\_

**What methods did you try?**

---

**What was the longest duration you were able to quit for?**

---

**Why couldn't you quit?**

---

**5. Where have you received or heard of smoking cessation methods?**

**(Choose all that are applicable to you)**

- I never heard about or received any information  
 Family or friends  
 Hospitals/clinics  
 Pharmacy  
 Media  
 Others, please specify \_\_\_\_\_

**6. I have thought about cutting down my cigarette intake before.**

True  False  Not sure

**If true, what was your reason to cut down?**

---

**If true, has your intake of cigarettes cut down now?**  Yes  No

**7. I have tried nicotine replacement therapy.**

True  False  Not sure what nicotine is

**If true, did it work? Why or why not?**

---



---



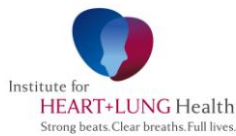

**8. I have thought about (intention) quitting before.**

- True     False     Not sure

**If true, what was your reason for quitting?**

---

**If false, what was the reason for not quitting?**

---

**9. I have met difficulty in quitting before.**

- True     False     Not applicable

**If true, what was your difficulty?**

- I enjoy smoking too much  
 I don't think I have enough willpower  
 I think I would put on weight  
 I would be too stressed  
 I think I am too addicted to cigarettes  
 My partner smokes  
 My best friend smoke  
 I would miss smoking with friends  
 I don't really want to stop  
 I would be bored  
 I would miss smoking breaks at work  
 Others, please specify \_\_\_\_\_

**10. In your opinion, what are the withdrawal symptoms due to quitting?**

- 
- I don't know what the withdrawal symptoms are.

**11. I would benefit more from smoking than suffering from withdrawal symptoms due to quitting.**

- True     False     Not sure

**If true, why is it?**

---

**12. There are people that support me for quitting.**

- True     False     Not sure     Not applicable

**If true, who supports you?**

---

**If true, what kinds of support did they provide you?**

---

**13. I would consider quitting in the future.**

- True     False     Not sure

**If true, what would be your reason for quitting in the future?**

---

**If true, what immediate reward would you like to get?**

---

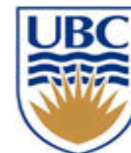

1  
2  
3  
4  
5  
6  
7  
8  
9  
10  
11  
12  
13  
14  
15  
16  
17  
18  
19  
20  
21  
22  
23  
24  
25  
26  
27  
28  
29  
30  
31  
32  
33  
34  
35  
36  
37  
38  
39  
40  
41  
42  
43  
44  
45  
46  
47  
48  
49  
50  
51  
52  
53  
54  
55  
56  
57  
58  
59  
60

14. I would quit smoking if people I spend time with quit also.

True     False     Not sure

If true, why?

---

15. I will be able to quit whenever I want.

True     False     Not sure

16. If you were to quit, what would be the most influential motivation?

---

17. What positive feelings would most help you in becoming a non-smoker?  
(Choose all that are applicable to you)

Confidence

Determination

Calm

Relaxation

Caring about myself

Caring about others

Others, please specify \_\_\_\_\_

18. Imagine that you are now a former smoker:

a) What could you do with the money you save?

---

b) How would your medication be different, if you are currently taking medication?

---

c) What would be your energy level?

---

d) What would be the quality of your life?

---

e) How would you be feeling physically as a non-smoker?

---

#### F. Your relationship with others

1. My smoking behaviour has changed my relationship with others. (Family, co-workers, classmates, and friends)

True     False     Not sure

If true, how has it changed your relationship with others?

---

2. Which people, or organization that you know, would approve of you smoking cigarettes?

---

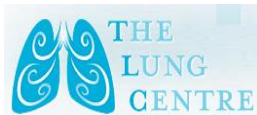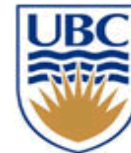

1  
2  
3  
4  
5  
6  
7  
8  
9  
10  
11  
12  
13  
14  
15  
16  
17  
18  
19  
20  
21  
22  
23  
24  
25  
26  
27  
28  
29  
30  
31  
32  
33  
34  
35  
36  
37  
38  
39  
40  
41  
42  
43  
44  
45  
46  
47  
48  
49  
50  
51  
52  
53  
54  
55  
56  
57  
58  
59  
60

3. Which people, or organization that you know, would disapprove of you smoking cigarettes?

---

4. I would encourage others (Family, co-workers, classmates, and friends) to smoke.

True     False     Not sure

If true, why would you encourage others to smoke?

---

If false, why would you not encourage others to smoke?

---

5. I would encourage others to quit.

True     False     Not sure

If true, what do you think is the best model to encourage people in your age group to quit?

---

6. I mind smoking in front of non-smokers.

True     False     Not sure

If true, why would you not smoke in front of non-smokers?

---

7. I mind smoking in front of young children.

True     False     Not sure

If true, why would you not smoke in front of young children?

---

8. I think second and third hand smoke is not as harmful as first hand smoke.

True     False     I don't know what third hand smoke is

#### G. Cultural and environmental influences for your desire to smoke or to quit

1. Media such as visual warnings on cigarette packages has influenced me to quit smoking.

True     False     Not sure     Not applicable

2. Living in Canada has influenced my smoking habits or desire to quit.

True     False     Not sure

If true, how has it influenced your smoking habits or desire to quit?

---



1  
2  
3  
4  
5  
6  
7  
8  
9  
10  
11  
12  
13  
14  
15  
16  
17  
18  
19  
20  
21  
22  
23  
24  
25  
26  
27  
28  
29  
30  
31  
32  
33  
34  
35  
36  
37  
38  
39  
40  
41  
42  
43  
44  
45  
46  
47  
48  
49  
50  
51  
52  
53  
54  
55  
56  
57  
58  
59  
60

3. The different social norms in Canada have influenced my smoking behaviour in comparison to my native country.

True  False  Not sure

If true, how has it influenced your smoking behaviour in comparison to your native country?

---

4. In your culture, smoking is a behaviour that one gender engages in more than other.

True  False  Not sure

If true, which gender?

Male  Female

5. In your culture, smoking is a behaviour that a certain career profession engages in more than other.

True  False  Not sure

If true, which career profession?

---

6. People do not accept the smoking habit in my culture.

True  False  Not sure

If true, why do they not accept the smoking habit?

---

7. Most people in my culture smoke.

True  False  Not sure

8. What is your image of a smoker? Do you think it is a positive or negative image?

Positive image  Negative image  Not sure

Why? Please explain.

---

9. In your opinion, how can a smoker harm or benefit the society?

---

10. In your opinion, what would be a good enforcement to stop the younger generation from smoking?

---

11. In your opinion, what should be the role of mass media?

---

12. What do you know about a cigarette? What does it do to the human body?

---

## STROBE Statement—checklist of items that should be included in reports of observational studies

|                              | Item No | Recommendation                                                                                                                                                                                                                                                                                                                                                                                                                                                                                                                                                                                                                                                                                   |
|------------------------------|---------|--------------------------------------------------------------------------------------------------------------------------------------------------------------------------------------------------------------------------------------------------------------------------------------------------------------------------------------------------------------------------------------------------------------------------------------------------------------------------------------------------------------------------------------------------------------------------------------------------------------------------------------------------------------------------------------------------|
| <b>Title and abstract</b>    | 1       | (a) Indicate the study's design with a commonly used term in the title or the abstract<br>(b) Provide in the abstract an informative and balanced summary of what was done and what was found                                                                                                                                                                                                                                                                                                                                                                                                                                                                                                    |
| <b>Introduction</b>          |         |                                                                                                                                                                                                                                                                                                                                                                                                                                                                                                                                                                                                                                                                                                  |
| Background/rationale         | 2       | Explain the scientific background and rationale for the investigation being reported                                                                                                                                                                                                                                                                                                                                                                                                                                                                                                                                                                                                             |
| Objectives                   | 3       | State specific objectives, including any prespecified hypotheses                                                                                                                                                                                                                                                                                                                                                                                                                                                                                                                                                                                                                                 |
| <b>Methods</b>               |         |                                                                                                                                                                                                                                                                                                                                                                                                                                                                                                                                                                                                                                                                                                  |
| Study design                 | 4       | Present key elements of study design early in the paper                                                                                                                                                                                                                                                                                                                                                                                                                                                                                                                                                                                                                                          |
| Setting                      | 5       | Describe the setting, locations, and relevant dates, including periods of recruitment, exposure, follow-up, and data collection                                                                                                                                                                                                                                                                                                                                                                                                                                                                                                                                                                  |
| Participants                 | 6       | (a) <i>Cohort study</i> —Give the eligibility criteria, and the sources and methods of selection of participants. Describe methods of follow-up<br><i>Case-control study</i> —Give the eligibility criteria, and the sources and methods of case ascertainment and control selection. Give the rationale for the choice of cases and controls<br><i>Cross-sectional study</i> —Give the eligibility criteria, and the sources and methods of selection of participants<br>(b) <i>Cohort study</i> —For matched studies, give matching criteria and number of exposed and unexposed<br><i>Case-control study</i> —For matched studies, give matching criteria and the number of controls per case |
| Variables                    | 7       | Clearly define all outcomes, exposures, predictors, potential confounders, and effect modifiers. Give diagnostic criteria, if applicable                                                                                                                                                                                                                                                                                                                                                                                                                                                                                                                                                         |
| Data sources/<br>measurement | 8*      | For each variable of interest, give sources of data and details of methods of assessment (measurement). Describe comparability of assessment methods if there is more than one group                                                                                                                                                                                                                                                                                                                                                                                                                                                                                                             |
| Bias                         | 9       | Describe any efforts to address potential sources of bias                                                                                                                                                                                                                                                                                                                                                                                                                                                                                                                                                                                                                                        |
| Study size                   | 10      | Explain how the study size was arrived at                                                                                                                                                                                                                                                                                                                                                                                                                                                                                                                                                                                                                                                        |
| Quantitative variables       | 11      | Explain how quantitative variables were handled in the analyses. If applicable, describe which groupings were chosen and why                                                                                                                                                                                                                                                                                                                                                                                                                                                                                                                                                                     |
| Statistical methods          | 12      | (a) Describe all statistical methods, including those used to control for confounding<br>(b) Describe any methods used to examine subgroups and interactions<br>(c) Explain how missing data were addressed<br>(d) <i>Cohort study</i> —If applicable, explain how loss to follow-up was addressed<br><i>Case-control study</i> —If applicable, explain how matching of cases and controls was addressed<br><i>Cross-sectional study</i> —If applicable, describe analytical methods taking account of sampling strategy<br>(e) Describe any sensitivity analyses                                                                                                                                |

Continued on next page

**Results**

|                  |     |                                                                                                                                                                                                                                                                                                                                                                                                               |
|------------------|-----|---------------------------------------------------------------------------------------------------------------------------------------------------------------------------------------------------------------------------------------------------------------------------------------------------------------------------------------------------------------------------------------------------------------|
| Participants     | 13* | (a) Report numbers of individuals at each stage of study—eg numbers potentially eligible, examined for eligibility, confirmed eligible, included in the study, completing follow-up, and analysed<br>(b) Give reasons for non-participation at each stage<br>(c) Consider use of a flow diagram                                                                                                               |
| Descriptive data | 14* | (a) Give characteristics of study participants (eg demographic, clinical, social) and information on exposures and potential confounders<br>(b) Indicate number of participants with missing data for each variable of interest<br>(c) <i>Cohort study</i> —Summarise follow-up time (eg, average and total amount)                                                                                           |
| Outcome data     | 15* | <i>Cohort study</i> —Report numbers of outcome events or summary measures over time<br><i>Case-control study</i> —Report numbers in each exposure category, or summary measures of exposure<br><i>Cross-sectional study</i> —Report numbers of outcome events or summary measures                                                                                                                             |
| Main results     | 16  | (a) Give unadjusted estimates and, if applicable, confounder-adjusted estimates and their precision (eg, 95% confidence interval). Make clear which confounders were adjusted for and why they were included<br>(b) Report category boundaries when continuous variables were categorized<br>(c) If relevant, consider translating estimates of relative risk into absolute risk for a meaningful time period |
| Other analyses   | 17  | Report other analyses done—eg analyses of subgroups and interactions, and sensitivity analyses                                                                                                                                                                                                                                                                                                                |

**Discussion**

|                  |    |                                                                                                                                                                            |
|------------------|----|----------------------------------------------------------------------------------------------------------------------------------------------------------------------------|
| Key results      | 18 | Summarise key results with reference to study objectives                                                                                                                   |
| Limitations      | 19 | Discuss limitations of the study, taking into account sources of potential bias or imprecision. Discuss both direction and magnitude of any potential bias                 |
| Interpretation   | 20 | Give a cautious overall interpretation of results considering objectives, limitations, multiplicity of analyses, results from similar studies, and other relevant evidence |
| Generalisability | 21 | Discuss the generalisability (external validity) of the study results                                                                                                      |

**Other information**

|         |    |                                                                                                                                                               |
|---------|----|---------------------------------------------------------------------------------------------------------------------------------------------------------------|
| Funding | 22 | Give the source of funding and the role of the funders for the present study and, if applicable, for the original study on which the present article is based |
|---------|----|---------------------------------------------------------------------------------------------------------------------------------------------------------------|

\*Give information separately for cases and controls in case-control studies and, if applicable, for exposed and unexposed groups in cohort and cross-sectional studies.

**Note:** An Explanation and Elaboration article discusses each checklist item and gives methodological background and published examples of transparent reporting. The STROBE checklist is best used in conjunction with this article (freely available on the Web sites of PLoS Medicine at <http://www.plosmedicine.org/>, Annals of Internal Medicine at <http://www.annals.org/>, and Epidemiology at <http://www.epidem.com/>). Information on the STROBE Initiative is available at [www.strobe-statement.org](http://www.strobe-statement.org).

# BMJ Open

## Assessing beliefs and risk perceptions on smoking and smoking cessation in immigrant Chinese adult smokers residing in Vancouver, Canada: a cross-sectional study

|                                 |                                                                                                                                                                                                                                                      |
|---------------------------------|------------------------------------------------------------------------------------------------------------------------------------------------------------------------------------------------------------------------------------------------------|
| Journal:                        | <i>BMJ Open</i>                                                                                                                                                                                                                                      |
| Manuscript ID:                  | bmjopen-2014-006435.R1                                                                                                                                                                                                                               |
| Article Type:                   | Research                                                                                                                                                                                                                                             |
| Date Submitted by the Author:   | 26-Nov-2014                                                                                                                                                                                                                                          |
| Complete List of Authors:       | Poureslami, Iraj; University of British Columbia, Respiratory Medicine Division<br>Shum, Jessica; University of British Columbia, Respiratory Medicine Division<br>FitzGerald, J Mark; University of British Columbia, Respiratory Medicine Division |
| <b>Primary Subject Heading</b>: | Smoking and tobacco                                                                                                                                                                                                                                  |
| Secondary Subject Heading:      | Smoking and tobacco                                                                                                                                                                                                                                  |
| Keywords:                       | Change management < HEALTH SERVICES ADMINISTRATION & MANAGEMENT, Organisation of health services < HEALTH SERVICES ADMINISTRATION & MANAGEMENT, Risk management < HEALTH SERVICES ADMINISTRATION & MANAGEMENT                                        |
|                                 |                                                                                                                                                                                                                                                      |

SCHOLARONE™  
Manuscripts

Only

1  
2  
3 **Title: Assessing beliefs and risk perceptions on smoking and smoking cessation in**  
4 **immigrant Chinese adult smokers residing in Vancouver, Canada: a cross-sectional study**  
5  
6

7  
8 **Corresponding author:**

9 Dr. J. Mark FitzGerald  
10 The Lung Centre, 7<sup>th</sup> Floor  
11 Gordon and Leslie Diamond Health Care Centre  
12 2775 Laurel Street  
13 Vancouver, BC, Canada  
14 V5Z 1M9  
15 Email: [mark.fitzgerald@vch.ca](mailto:mark.fitzgerald@vch.ca)  
16  
17 Phone: 604-875-4122  
18  
19  
20  
21

22  
23 **Co-authors:**

24 Dr. Iraj Poureslami  
25 UBC, Faculty of Medicine, Respiratory Medicine Division  
26 Centre for Clinical Epidemiology and Evaluation (C2E2)  
27 Vancouver General Hospital – Research Pavilion  
28 716-828 West 10<sup>th</sup> Avenue  
29 Vancouver, BC, Canada  
30 V5Z 1M9  
31  
32  
33  
34

35  
36 Jessica Shum  
37 UBC, Faculty of Medicine, Respiratory Medicine Division  
38 Centre for Clinical Epidemiology and Evaluation (C2E2)  
39 Vancouver General Hospital – Research Pavilion  
40 828 West 10<sup>th</sup> Avenue  
41 Vancouver, BC, Canada  
42 V5Z 1M9  
43  
44  
45  
46  
47

48 **Keywords:** smoking, Chinese communities, beliefs, risk perceptions, smoking cessation  
49

50  
51 **Word count: 4722**

52  
53 **Abstract: 299**  
54  
55  
56



**What this paper adds:**

1. Understanding the beliefs, perceptions, and practice of Chinese Mandarin and Cantonese communities about smoking and smoking cessation creates opportunities to tailor smoking cessation interventions according to the needs of these communities.
2. Previously, most studies have applied an identical risk perception model on smoking behaviour assessments among young vs. old and male vs. female smokers. However, our study identified that risk perception about smoking and smoking consequences differ in the smoking population group based on their age and gender. Therefore, a different model of risk perception should be designed and applied considering the age and gender of participants.
3. Despite existing knowledge that Chinese communities are heterogeneous, our study found that smoking habit, perceptions, beliefs, and practice differ in Mandarin speaking compared to Cantonese speaking Chinese.

**ABSTRACT**

**Objectives:** We aimed to conduct culturally based participatory research to assess cultural and belief contexts for smoking behaviours within Mandarin and Cantonese communities. Outcome variables were smoking-related knowledge, smoking patterns, attitudes and beliefs, and perceived barriers and facilitators to successful cessation.

**Design:** A community-based approach was applied involving smokers, community key-informants, and professionals in study design and implementation. Initially, focus groups were conducted and findings were used to develop study instrument. Participants responded once to study questionnaire after informed consent.

**Setting:** Community based in the Greater Vancouver Area, Canada.

**Participants:** 16 Chinese smokers participated in focus groups and subsequently, 167 current Chinese immigrant (137 males and 30 females) smokers from Mandarin and Cantonese communities, recruited with the help of community agencies and collaborating physicians, were enrolled in a cross-sectional study.

**Results:** We found that a majority believed smoking was harmful on their health. Younger smokers (<35 years of age) did not mind smoking in front of young children compared to older smokers ( $\geq 35$  years of age) ( $p < 0.001$ ). People with high school or lower levels of education believed that they would benefit more from smoking than suffering from withdrawal symptoms compared to better educated smokers ( $p < 0.05$ ). Mandarin smokers were significantly more likely to encourage others to quit than Cantonese smokers ( $p < 0.05$ ). Many indicated not receiving adequate support from care providers and lack of access to culturally and linguistically appropriate cessation programs impacted on their ability to quit smoking.

1  
2  
3 **Conclusion:** Our study highlighted the importance of tobacco beliefs among Mandarin and  
4  
5 Cantonese speaking immigrants with limited access to healthcare information and for younger  
6  
7 smokers whose attention to health consequences of smoking may be limited as well. Study  
8  
9 participants were generally aware of the health risks and were willing to quit. Access to  
10  
11 appropriate cessation programs would fulfill their willingness.  
12  
13  
14  
15  
16  
17  
18  
19  
20  
21  
22  
23  
24  
25  
26  
27  
28  
29  
30  
31  
32  
33  
34  
35  
36  
37  
38  
39  
40  
41  
42  
43  
44  
45  
46  
47  
48  
49  
50  
51  
52  
53  
54  
55  
56  
57  
58  
59  
60

For peer review only

## Article Summary

### Strengths and Limitations of this study

- We undertook a community-based participatory approach, with community key-informants and healthcare providers were heavily involved in all aspects of the study such as design, instrument development, implementation, community outreach, and dissemination. These key-stakeholders are important allies in developing culturally and linguistically appropriate smoking cessation interventions.
- Our study provides evidence that attitudes and beliefs of cigarette smoking differ between language, age, and gender groups. The differences with regards to tobacco smoking appear to be related to attitudes or knowledge.
- The results build a window of opportunity to promote tailored cessation interventions incorporating cultural beliefs, perceptions, and practices for Chinese immigrant communities.
- We used a convenience sampling method, which may not reflect the actual smoking prevalence and patterns of Chinese Mandarin and Cantonese immigrants in the Greater Vancouver Area.
- All responses were by self-report and validation of smoking behaviour or reasons to quit or continue smoking was not possible with a cross-sectional design.

## BACKGROUND

Tobacco use remains the leading cause of preventable morbidity and mortality in the world.[1-3]

In Canada, its use has been declining slower than expected in spite of increased taxation on cigarettes and more stringent tobacco policies put into place.[3] In order to accomplish the goal of reducing the rate of smokers among Canadian adults, smoking has to be addressed among all sub-populations, especially those with a higher smoking prevalence than the general population. Global studies have shown that those who stop smoking greatly reduce their risk of developing cardio pulmonary disease and that in general the longer the period of cessation, the greater is the reduction in risk.[4,5] Minority and immigrant communities in Canada may be at greater risk of smoking-related illnesses.[6] Reasons include lack of knowledge and awareness about the link between smoking and lung disease;[7] limited access to smoking cessation programs due to cultural, language, and systemic barriers; [8] and smoking behaviour.[9,10] In addition, many immigrants from low-and-middle-income countries have had prior significant exposure to biomass and bio-fuel as well as smoking which further increases their risk.[11] This is particularly true among immigrants from Mandarin and Cantonese speaking communities (the largest immigrant minority groups living in the BC and Canada)[12,13] where smoking rates remains high.[9,10] Such extensive tobacco use among immigrants may be due to the fact that smoking is a largely integrated into the Chinese male culture.[14] Nearly two of every three adult men in China are smokers.[15,16] It is, therefore, empirically relevant to try to understand this immigrant group's smoking knowledge, behaviours, and habits and develop culturally appropriate educational and counselling services to improve tobacco prevention attempts and promote cessation. Maximizing tobacco control for newcomers requires a special understanding of smoking pattern and beliefs of new immigrant populations. The objectives of this study were:

1  
2  
3 1) to explore smoking use patterns, smoking-related knowledge, beliefs and attitudes, and  
4  
5 perceived barriers and facilitators to smoking cessation among Mandarin and Cantonese  
6  
7 speaking communities living in the Greater Vancouver Area (GVA), and 2) to assess the  
8  
9 effectiveness of socio-cultural and environmental factors which influenced the onset of smoking  
10  
11 and smoking habits (continued smoking) among the study participants. We were also interested  
12  
13 to identify differences in above mentioned variables between males and females, Mandarin and  
14  
15 Cantonese, and between age and education level groups. The identification of tobacco use and  
16  
17 other related patterns may help facilitate the development of community-based culturally  
18  
19 appropriate interventions targeting tobacco use and would be helpful for Chinese immigrants in  
20  
21 future research.  
22  
23  
24  
25  
26  
27  
28

## 29 **METHODS**

### 30 **Project Design**

31  
32 This multi-stage cross-sectional study employed both qualitative and quantitative components  
33  
34 within an over-arching community-based participatory framework. The first stage comprised the  
35  
36 development and testing of a measurement instrument for the survey study. The second stage  
37  
38 was a quantitative study assessing the outcome variables including smokers' awareness of  
39  
40 smoking and its cessation, attitudes and beliefs about smoking harms and benefits, and cultural  
41  
42 norms of smoking in their community.  
43  
44  
45  
46  
47

48 The study was conducted between January 2013 and June 2014, allowing for participation and  
49  
50 collaboration between members of the Mandarin and Cantonese communities and other key-  
51  
52 stakeholders such as professionals and researchers in the research process.[17-19] Connections  
53  
54 and networking were built with community key-informants and community agencies (e.g.,  
55  
56  
57

1  
2  
3 SUCCESS (United Chinese Community Enrichment Services Society), Vancouver Coastal  
4  
5 Health community organizations, etc.) supporting active involvement and contribution in study  
6  
7 design, development and implementation. Community collaborators provided assistance with  
8  
9 recruitment of Mandarin and Cantonese smokers as well as input and suggestions on the  
10  
11 development of focus group and interview questions. They recruited two males and two females  
12  
13 who were members of the community, fluent in Mandarin and Cantonese, to work in alliance  
14  
15 with 4 female bilingual Chinese research assistants. All community facilitators and research  
16  
17 assistants received necessary training prior the study. The training included approaches on how  
18  
19 to best recruit study participants, understanding of the project's aims and objectives, how to  
20  
21 conduct focus groups and individual interviews with smokers from their own communities, and  
22  
23 ideas on how the team could work together effectively in collection of the best information  
24  
25 possible on Chinese smokers' knowledge, beliefs and attitudes about harms and benefits of  
26  
27 smoking, and socio-cultural and environmental factors affecting smoking and smoking cessation.  
28  
29 The community researchers transcribed and translated focus group and interview discussions and  
30  
31 we applied the collected information in the development of a study measurement tool and  
32  
33 conceptual framework. In addition, findings from our previous qualitative smoking study  
34  
35 (conducted with smokers from the same communities) were used in the development of the study  
36  
37 design and measurement tool.[20]  
38  
39  
40  
41  
42  
43  
44  
45  
46  
47

## 48 **Ethics**

49  
50 Ethics approval was obtained for this study from the University of British Columbia Research  
51  
52 Ethics Board. All participants signed a written consent form in their preferred written language  
53  
54 (Chinese Simplified, Chinese Traditional, or English) translated by the bilingual researchers who  
55  
56

---

1  
2  
3 clearly explained the study rationale, goals and objectives, and how their involvement would be  
4  
5 like prior to the study.  
6  
7  
8  
9

### 10 **Study Measurement Tool**

11  
12 We initially developed the study measurement tool by determining whether any English or  
13  
14 Chinese language questionnaires were currently in use to assess attitudes and beliefs re smoking  
15  
16 in Chinese community. A literature search and an informal survey of immigrant-serving  
17  
18 community agencies did not find any such instrument. Given the absence of a validated  
19  
20 assessment questionnaire in the target languages, a new measurement tool was developed over a  
21  
22 4-month period. Development of the study measurement tool began with information collected  
23  
24 from initial focus group session participants (n=14) and individual interviews (n=2), review of  
25  
26 relevant literature that addressed knowledge of, attitudes to, and behaviors in relation to tobacco  
27  
28 use, and also our previous smoking-related qualitative studies with Mandarin and Cantonese  
29  
30 current and ex-smokers.[20,21] Moreover, a professional measurement tool developer (a PhD in  
31  
32 the socio-psychology research and evaluation field from University of British Columbia) with  
33  
34 expertise in developing mixed open-ended and closed-format questionnaires was involved in the  
35  
36 face and content validation and finalization of the measurement tool. The team and the  
37  
38 measurement developer have the expertise to identify and differentiate between beliefs, attitudes  
39  
40 and perceptions, as well as the socio-cultural and environmental aspects of smoking and its  
41  
42 cessation. Each set of variables were identified and separated by heading-title in the  
43  
44 questionnaire. The internal consistency of the data was checked by test-retesting reliability,  
45  
46 where the study questionnaire was administered to 5 smokers and tested again a week after and  
47  
48  
49  
50  
51  
52  
53  
54  
55  
56  
57



1  
2  
3 the results of the initial assessment and retest were compared. Also, more advanced process was  
4  
5 applied by calculating Cronbach Alpha and a coefficient was (.89).  
6  
7  
8  
9

10 The final questionnaire covered current smoking knowledge, beliefs, and attitudes about  
11  
12 smoking and its cessation, and socio-cultural and environmental factors that promote or prevent  
13  
14 smoking onset and continuation. The tool included 70 questions covering demographics and  
15  
16 concepts on smoking onset, smoking characteristics, perceptions, experience in quitting, social  
17  
18 relationships, and cultural and environmental influences and were in the format of yes/no,  
19  
20 true/false, multiple choice, and open-ended questions (The study measurement tool can be found as  
21  
22 Supplementary File 1). The questionnaire was also reviewed by a number of key-informants and health  
23  
24 practitioners (n=9) from the target communities who provided feedback and comments re the  
25  
26 questionnaire and checked its face and content validity. The bilingual Chinese research assistants  
27  
28 worked collaboratively together translating the study measurement tool to Chinese Simplified  
29  
30 and Traditional formats. The translations were reviewed by secondary (back-up) translators from  
31  
32 the target communities who were introduced by the collaborating immigrant agencies for  
33  
34 accuracy and correctness. The tool was then reviewed by the community key-informants and  
35  
36 professionals for further crosschecking. Finally we pilot tested the questionnaire with selected  
37  
38 smokers and ex-smokers from the Chinese communities (n=5) to confirm validation of the  
39  
40 measurement tool and for cultural relevance and clarification, as well as translation purposes  
41  
42 including understandability, acceptability, and applicability. Suggestions were integrated into a  
43  
44 revised version.  
45  
46  
47  
48  
49  
50  
51  
52  
53  
54  
55  
56

## Participant Recruitment

Eligibility criteria for participants were adults ( $\geq 21$  years old) who were current smokers (defined by having smoked at least 5 cigarettes per day during the past 30 days), Chinese descent (either Mandarin or Cantonese speaking) and be immigrants to Canada or children of Chinese immigrants. Participants were recruited from within the communities using a variety of outreach methods such as posting flyers and referral applied from previous studies and through network with community agency collaborators.[17,22,23] In total, 16 Chinese smokers participated in initial focus groups and interviews and subsequently 167 (137 males and 30 females) were interviewed, from which 93 were Mandarin speaking and 74 were Cantonese speaking. In terms of age category, 90 participants were  $< 35$  years of age and 76 were  $\geq 35$  years of age. Our intended sample size was 150 Chinese smokers aiming to identify mean differences in knowledge, beliefs, attitudes, and practices related to smoking and experience in smoking cessation between age, gender, education, and ethnicity groups.

## Data Collection

Data was collected through administration of study questionnaire and individual interviews. Interview sessions were conducted at places and times of convenience for participants: e.g., participants' homes, community centres, and our research centre. Printed consent forms were explained and signed preceding the interview. Modest honoraria were paid to cover time, travel, and parking expenses. Community research assistants conducted the interviews in Mandarin or Cantonese and the participants filled in a self reported Chinese Simplified or Chinese Traditional questionnaire while the research assistant were available to answer any questions that they would have had, or ask the responders to elaborate the given information in the open-ended questions.

1  
2  
3 Each interview was conducted by two interviewers: one with an academic perspective (a  
4 research assistant), and one from community who acted as a facilitator. The two interviewers  
5  
6 took notes during interviews including verbal and non-verbal communication by the participants  
7  
8 and reviewed their notes at the end of each interview aiming to improve the accuracy of the  
9  
10 information, capturing smokers' smoking beliefs, perceptions, and also their comments about  
11  
12 cultural images of smoking and its cessation. In some instances (e.g., old smokers or low literate  
13  
14 people), the research assistants assisted by administered the study questionnaire verbally while  
15  
16 taking notes throughout the entire interview.  
17  
18  
19  
20  
21  
22  
23

### 24 **Data analysis**

25  
26 SPSS v20 (2012) was used for all statistical tests. Descriptive statistical tests were used and the  
27  
28 results were presented in tables and graphs. Relevant inferential statistics were calculated for the  
29  
30 entire sample and stratified according to age, gender, level of education, language of origin, and  
31  
32 smoking patterns. The data were not normally distributed, and non-parametric tests were  
33  
34 therefore used; e.g., chi-square test for nominal data, Mann–Whitney test for ordinal data with  
35  
36 two groups, and Kruskal–Wallis test for more than two groups with ordinal data. Binary logistic  
37  
38 regression was used to determine the effects of demographics on the outcome variables. All data  
39  
40 were examined regarding distributions and trends in the data, and the level of significance was  
41  
42 set at the  $P < 0.05$  level.  
43  
44  
45  
46  
47  
48  
49

### 50 **Sample Size Calculation**

51  
52 With a total sample size of 167 subjects for the cross-sectional study, we estimated that we could  
53  
54 identify mean differences between different age, gender, language and education level groups  
55  
56

---

and with an effect size of 0.45 with 80% statistical power and a two-sided significance level of  $P < 0.05$ .

## FINDINGS

Between May 2013 and April 2014, we recruited and enrolled 167 current smokers. **Table 1** describes characteristics of the study sample for both Mandarin (55.7%, n=93) and Cantonese (44.3%, n=74). The participants included predominately males (82%, n=137). The median age was 35 and we used this cut off point for younger/older groups, as used previously from our qualitative studies conducted with Chinese community smokers,[20] allowing us to identify these differences in perspective.

**Table 1. Participant characteristics**

|                             | N   | %    |
|-----------------------------|-----|------|
| <b>Gender</b>               |     |      |
| Male                        | 137 | 82   |
| Female                      | 30  | 18   |
| <b>Language</b>             |     |      |
| Mandarin                    | 93  | 55.7 |
| Cantonese                   | 74  | 44.3 |
| <b>Age</b>                  |     |      |
| <35                         | 105 | 63   |
| ≥35                         | 62  | 37   |
| <b>Education Level</b>      |     |      |
| High school under           | 87  | 52   |
| University degree and above | 80  | 48   |

### Smoking-related knowledge and reasons for starting smoking

Knowledge of smoking consequences is an important factor to consider when designing smoking cessation programs or implementing health promotion interventions, especially to prevent onset of smoking among young people.[2,8] Almost an equal number (23%) of Mandarin and Cantonese smokers indicated that they were not aware of smoking side effects when they started smoking. Table 2 provides the breakdown of smoking-related knowledge by gender, age, and education level.

**Table 2.** ‘At the time you started smoking, did you know the side effects of smoking?’

|                             | Yes |    | No |    |
|-----------------------------|-----|----|----|----|
|                             | N   | %  | N  | %  |
| <b>Gender</b>               |     |    |    |    |
| Male                        | 105 | 77 | 32 | 23 |
| Female                      | 22  | 73 | 8  | 27 |
| <b>Age</b>                  |     |    |    |    |
| <35                         | 90  | 86 | 15 | 14 |
| ≥35                         | 38  | 62 | 24 | 39 |
| <b>Education Level</b>      |     |    |    |    |
| High school under           | 61  | 70 | 26 | 30 |
| University degree and above | 67  | 84 | 13 | 16 |

We also aimed to determine the *socio-cultural and environmental* factors which influenced the onset of smoking among the study participants.[24] In this study, we defined social factors as smoking during the gatherings, being offered cigarettes by peers (a cultural norm in this community), smoking to feel being accepted, etc. On average for 45% (n=75) of participants, ‘social factors’ were a trigger to start smoking, while it was the number one trigger for male smokers and smokers with who were 35 years or over with an equal rate of 53%. Although 50% of females mentioned ‘emotional factors’ as a contributor to starting smoking, only 22% (on average) of males cited these as factors for them. Likewise, ‘environmental factors’ were considered by only 20% of participants as a factor in starting to smoke, while 50% of Mandarin smokers mentioned environmental factors as a major trigger for them to start smoking. A

1  
2  
3 smoking friend was mentioned by most of participants (66.3%) as someone in their social  
4 network when starting smoking, compared to classmate (48.5%), family (29%), and work-related  
5 colleagues (28%). An interesting observation was that 50% of female smokers in the study  
6 identified having a family member who smoked when they first started smoking.  
7  
8  
9  
10  
11  
12

### 13 **Smoking beliefs, perceptions, and attitudes**

14  
15 For more than 60% of smokers, the main reasons to smoke regularly were the beliefs that  
16 smoking '*relaxed them*' and '*helped them feel less stress*': while 59% (n=81) of male smokers  
17 selected these factors, only 47% (n=14) of female smokers said so. Multiple factors affected  
18 males to become regular smokers. Mandarin and Cantonese speaking smokers equally chose  
19 relaxation (54%), with more Mandarin believing that smoking helped them to cope with stress  
20 (67%) compared to Cantonese smokers (54%), the differences were not statistically significant.  
21 Moreover, over 60% of the participants said they smoke when they '*are having a break*' and  
22 finally, less than 12% of the participants believed that smoking helped them to '*fit in with other*  
23 *people*'. This rate was 20% among females (n=6) and 19% (n=15) among highly educated  
24 smokers. Table 3 provides the breakdown of the triggers to smoke.  
25  
26  
27  
28  
29  
30  
31  
32  
33  
34  
35  
36  
37  
38  
39  
40

41 **Table 3.** '*Smoking relaxes me and makes me feel less stress.*'

|                             | Relaxation |    | Less stress |      |
|-----------------------------|------------|----|-------------|------|
|                             | N          | %  | N           | %    |
| <b>Gender</b>               |            |    |             |      |
| Female                      | 22         | 73 | 21          | 70   |
| Male                        | 82         | 60 | 81          | 59   |
| <b>Age</b>                  |            |    |             |      |
| <35                         | 73         | 70 | 71          | 68   |
| ≥35                         | 31         | 51 | 31          | 51   |
| <b>Education Level</b>      |            |    |             |      |
| High school under           | 50         | 58 | 45          | 52   |
| University degree and above | 55         | 69 | 50          | 62.5 |

1  
2  
3  
4  
5  
6 We were also interested to identify the *social and cultural* aspects of smoking habits (continued  
7  
8 smoking). When asked the question of whether ‘*most people in my culture smoke*’ to assess  
9  
10 participants’ perceived commonality of smoking in their communities, there was a significant  
11  
12 difference between male and female participants ( $\chi^2 = 5.424$ ,  $df = 1$ ,  $P < 0.05$ ) ; more males  
13  
14 (n=46, 34%) believed that smoking was a cultural habit in their community than females (n=17,  
15  
16 57%) did. Similar findings were observed between Mandarin and Cantonese ( $\chi^2 = 5.182$ ,  $df = 1$ ,  
17  
18  $P < 0.05$ ); more Mandarin (n=65) answered yes to the question than Cantonese smokers (n=39).  
19  
20 Many participants (61%) indicated they normally smoked when they were ‘with friends’; with  
21  
22 the highest proportion reported among the <35 years old participants (82%) and male  
23  
24 participants (70%). Remarkably, 70% of the <35 years old participants indicated they smoked  
25  
26 when they had alcohol. The rate was 60% among female participants, 57% among males, and  
27  
28 57% among both Mandarin and Cantonese smokers. In terms of attitudes towards exposing  
29  
30 others to second or third-hand smoke, we asked participants ‘*do you mind smoking in front of*  
31  
32 *non-smokers*’? Younger smokers (<35 years of age) were more likely (n=72) to mention that  
33  
34 they did not mind smoking in front of non-smokers compared to older smokers ( $\geq 35$  years of  
35  
36 age) (n=52). The mean difference was significant ( $\chi^2 = 7.133$ ,  $df = 1$ ,  $P < 0.01$ ). Also, when the  
37  
38 participants were asked whether they minded smoking in front of young children, similarly, more  
39  
40 younger smokers (<35 years of age) (n=97) mentioned that they ‘*did not mind smoking in front*  
41  
42 *of young children*’ than the older smokers (n=55) and the difference was significant ( $\chi^2 = 5.123$ ,  
43  
44  $df = 1$ ,  $P < 0.05$ ). We also aimed to assess smokers’ viewpoints regarding second hand smoking  
45  
46 and its harm. We asked whether ‘*second and third hand smoke was as harmful as first hand*  
47  
48 *smoke*’, again, relatively more males said ‘no’ when compared to female smokers (n= 40 and n=  
49  
50  
51  
52  
53  
54  
55  
56  
57  
58  
59  
60

1  
2  
3 10, respectively) and the difference was significant ( $\chi^2 = 4.736$ ,  $df = 1$ ,  $P < 0.05$ ). Finally, we  
4  
5 assessed smokers' beliefs about their own smoking pattern with a self-reported question of '*I*  
6  
7 *have a smoking routine/pattern*'. No significant differences were identified between gender, age,  
8  
9 and language groups. However, we found that more people with high school education or less  
10  
11 mentioned they didn't have a routine/pattern (n=30) compared to people with higher education  
12  
13 (n=12) and the difference was significant ( $\chi^2 = 7.156$ ,  $df = 1$ ,  $P < 0.01$ ).  
14  
15  
16  
17  
18  
19

### 20 **Perceptions about smoking**

21  
22 We assessed smokers' perceived *enjoyable feeling* that they may have due to smoking by asking  
23  
24 whether '*there is a different feeling when comparing times I smoke and don't smoke*' and found a  
25  
26 statistically significant difference between male and female participants ( $\chi^2 = 4.237$ ;  $df = 1$ ,  
27  
28  $P < 0.05$ ). Significantly more males (n=47) mentioned experiencing a different feeling when they  
29  
30 smoked compared to not smoking than female smokers (n=15). In addition, younger smokers  
31  
32 (<35 years of age) as well claimed to have a different feeling when comparing times smoking  
33  
34 and not smoking (n=46) compared to older smokers (n=16), and the differences were statistically  
35  
36 significant ( $\chi^2 = 3.889$ ,  $df = 1$ ,  $P < 0.05$ ). Likewise, more Mandarin smokers (n=41) than  
37  
38 Cantonese smokers (n=20) reported having a different feeling when they smoke compared to  
39  
40 when they were not smoking ( $\chi^2 = 5.188$ ,  $df = 1$ ,  $P < 0.05$ ). For this outcome there was no  
41  
42 significant differences between highly educated (college/university and above) and lower  
43  
44 educated (high school or lower).  
45  
46  
47  
48  
49

50  
51 Additionally, we assessed smokers' perceptions about *helpfulness* of smoking to alleviate their  
52  
53 anxiety and stress. We noticed that 77% of female smokers, 69% of younger smokers (aged 34  
54  
55 years or younger), and 52% of older smokers (age 35 or older) smoked to reduce their sense of  
56  
57



1  
2  
3 helpfulness. Male smokers perceived that smoking helped them to minimize the feeling of being  
4 bored (80%) and made them more connected to their group of friends (69%).  
5  
6  
7  
8  
9

### 10 11 12 **Smoking cessation**

13  
14 We aimed to identify willingness to quit smoking and *perceived barriers and facilitators* to  
15 cessation. The majority of participants, in particular young male and female smokers, mentioned  
16 their desire to quit and attempted to several times, before giving up and smoking again. A few  
17 people mentioned using medications or seeking professional advice to quit smoking but mainly  
18 relied on their own willpower to quit. Also, older participants indicated trying to quit due to  
19 health related issues such as heart disease or cancer. We were also interested to find out whether  
20 participants were under pressure by someone close to them to quit smoking. When asked '*I was*  
21 *nagged by someone to quit smoking*', no statistically significant differences were identified in  
22 different gender, age, language, and education groups. However, when we asked whether they  
23 '*would encourage others to quit*', more Mandarin speaking smokers answered yes to (n=45) than  
24 Cantonese speaking smokers (n=23) ( $\chi^2 = 5.172$ ,  $df = 1$ ,  $P < 0.05$ ). No significant differences were  
25 identified based on age, gender, and level of education. In addition, most participants (87%) said  
26 "No" to the question: "*Would you encourage non-smokers to smoke?*" Furthermore, we also  
27 asked whether living in a smoking restricted society like Canada would encourage smokers to  
28 quit or cut down on their smoking. More Mandarin speaking smokers (n=56, 60%) mentioned  
29 that '*living in Canada influenced their smoking habits or desire to quit*', compared to Cantonese  
30 speaking smokers (n=30, 41%) ( $\chi^2 = 6.424$ ,  $df = 1$ ,  $P = 0.011$ ).  
31  
32  
33  
34  
35  
36  
37  
38  
39  
40  
41  
42  
43  
44  
45  
46  
47  
48  
49  
50  
51  
52  
53  
54  
55  
56  
57  
58  
59  
60

1  
2  
3 More people with high school or lower education (n=34) agreed with the statement '*I would*  
4 *benefit more from smoking than suffering from withdrawal symptoms due to quitting*', compared  
5  
6 to the more educated smokers (n=12) ( $\chi^2 = 6.102$ , df = 1,  $P < 0.05$ ). When asked whether they  
7  
8 '*tried nicotine replacement therapy to quit smoking*', more Mandarin speaking smokers (n=32)  
9  
10 mentioned that they had tried this aid to quit smoking compared to Cantonese speaking smokers  
11  
12 (n=12) ( $\chi^2 = 7.275$ , df = 1,  $P = 0.007$ ).  
13  
14  
15  
16  
17  
18  
19

20 In general, participants identified language and literacy issues as barriers to accessing smoking  
21  
22 cessation information as well as lack of useful information in a social media format. For  
23  
24 instance, older participants mentioned that they had limited exposure to public sources of  
25  
26 information on cessation services that were developed in their native language. A small minority  
27  
28 of these smokers had received advice and information about the health issues attributed to  
29  
30 smoking from their physicians. Younger smokers mentioned the lack of disseminating smoking  
31  
32 cessation messages through social media such as text messaging to promote quitting services in  
33  
34 their native language.  
35  
36  
37  
38  
39  
40

41 Our synthesis of the interview data identified seven barriers to the participants' cessation which  
42  
43 are summarized in Table 4.  
44  
45

46 **Table 4.** *Barriers to Smoking Cessation identified by the participants*  
47

| Barriers                                                                                           |
|----------------------------------------------------------------------------------------------------|
| (a) the problems of managing their lives in a highly stressful environment                         |
| (b) their isolation and the limited support systems in their community or work/school environments |

- 1  
2  
3  
4 (c) the availability of smoking as a social-connection to their peers and limited resources for  
5  
6 pleasure  
7  
8 (d) perceived minimal health risks of smoking, (e) the commonality of smoking in their  
9  
10 community  
11  
12 (e) the commonality of smoking in their community  
13  
14 (f) the scarce or non-existent information about how to stop smoking  
15  
16  
17 (g) the belief that all they can quit on their own whenever they decide to  
18  
19

## 20 21 22 **DISCUSSION**

23  
24 The main goal of this study was to gain insight on the beliefs and perceptions associated with  
25 smoking behaviours and smoking cessation among Chinese Cantonese and Mandarin speaking  
26 current smokers, taking into account culturally specific knowledge and practices. The results  
27 have implications for the development of appropriate smoking cessation programs and  
28 educational interventions to prevent and control tobacco-related health issues among the target  
29 communities. Such interventions may have policy implications in health promotion programs to  
30 prevent smoking onset among younger population groups in the immigrant communities.  
31  
32  
33  
34  
35  
36  
37  
38  
39  
40  
41  
42

43 Several participants in this study indicated their desire to quit and attempted to do so many times,  
44 many of whom did it relying on their own willpower. Only a few, mainly among older smokers,  
45 tried to quit due to health related issues. They mentioned that a better communication with  
46 primary care providers and ease of access to culturally and linguistically appropriate smoking  
47 cessation resources would promote smoking cessation in their communities. Similar findings  
48 have been reported in studies done in other countries as well as among many immigrant  
49  
50  
51  
52  
53  
54  
55  
56  
57

1  
2  
3 communities in Canada who tried to quit smoking.[25-28] In addition to elucidating these  
4  
5 barriers to smoking cessation and despite continued smoking, participants showed being  
6  
7 knowledgeable in health related and other negative aspects of smoking as on average, 70% of the  
8  
9 participants indicated they were aware of the health consequences of smoking. This finding has  
10  
11 been confirmed in other studies. [28] In our study, we found that higher education, better  
12  
13 knowledge, and smoking regulations contributed to having a greater intent to quit smoking. For  
14  
15 instance, we found that most participants were not ignorant of the dangers of smoking, with the  
16  
17 vast majority recognizing that smoking posed risks to their own health and the health of those  
18  
19 around them. This knowledge is much higher than that of Chinese smokers who were previously  
20  
21 surveyed in China back to 2011, where only 36% of participants believed smoking can cause  
22  
23 lung cancer and only 4% were aware of the relationship of smoking to heart disease.[29] In  
24  
25 addition, many of the smokers in our study already accepted limitations on the use of cigarettes  
26  
27 in Canada, and many, mostly younger smokers, supported restrictions on indoor smoking and  
28  
29 also mentioned not smoking at home or where children are present. This could be attributed to  
30  
31 the smoking restriction rules as well as the strong anti-smoking educational campaigns in  
32  
33 Canada. For example, since 2001, Health Canada has spent more than \$480 million for a 5-year  
34  
35 program to encourage tobacco cessation programs for all Canadians.[30] These regulations might  
36  
37 be important to reduce the risk of second-hand and third-hand smoking and related health issues  
38  
39 among young children and other non-smoker family members.  
40  
41  
42  
43  
44  
45  
46  
47  
48  
49  
50

51 In terms of reasons to continue smoking, perceived advantages of smoking such as ‘smoking  
52  
53 does make me feel more comfortable’ and ‘smoking helps me to be stress-free when I have  
54  
55 problems’ appeared to be more important factors to promote smoking continuation among our  
56

---

1  
2  
3 study participants than perceived disadvantages around 'health issues' and 'money' which shown  
4  
5 to be strong motivators in quitting smoking in some studies. Some studies found that smokers  
6  
7 may not be aware of the diseases caused by smoking and therefore, they may perceive  
8  
9 themselves less susceptible to the risks of smoking.[30-34] For instance, health consequences  
10  
11 and costs of smoking were not perceived as strong motivators to quit smoking among young  
12  
13 participants. They reported the stimulating and anti-stress effects of smoking (smoking may  
14  
15 actually made them feel happier, more alert, etc), the feelings that may reinforce their tobacco  
16  
17 use and have associated these feelings with being around other smokers. In older smokers, most  
18  
19 of which showed low self-efficacy on being able to quit, the rationale for continuing to smoke  
20  
21 was different. For instance, for over 16% of smokers in this age group the disadvantages of  
22  
23 quitting were perceived to outweigh its advantages. Some reasons mentioned by older  
24  
25 participants were: the addiction aspect of nicotine, being too late to quit, and their body needed  
26  
27 nicotine. In other studies among mainstream populations, self-efficacy expectations and  
28  
29 advantages of smoking cessation appeared to be the most important associates of quitting  
30  
31 smoking among older smokers.[35,36] Therefore, this issue should be revisited in future studies  
32  
33 with ethno-cultural communities. The results of this study suggest that understanding health  
34  
35 beliefs and perceptions around smoking and improving self-efficacy are useful tools in  
36  
37 promoting smoking cessation among smokers in Chinese immigrant communities.  
38  
39  
40  
41  
42  
43  
44  
45  
46  
47

### 48 **Limitations**

49  
50 Some limitations need to be considered. First, this study used a convenience sample, so it may  
51  
52 not reflect the actual smoking prevalence and patterns among Mandarin and Cantonese  
53  
54 immigrants in the GVA. We could not explore the effect of acculturation on smoking habit and  
55  
56

---

1  
2  
3 pattern. There was no previous data on smoking pattern among Chinese immigrants in Canada,  
4  
5 and attempting a community based assessment would have been inherently difficult for an  
6  
7 exploratory study. Therefore the findings of this study cannot be generalized to larger Mandarin  
8  
9 and Cantonese speaking communities residing in the GVA. The goal was to explore the links to  
10  
11 smoking cessation among Mandarin and Cantonese populations in order to gain insight into the  
12  
13 need to adapt smoking cessation programs in these groups. In future research, a longitudinal  
14  
15 design in which our results can be tested is recommended. A second limitation is the fact that all  
16  
17 responses were by self-report and validation of smoking behaviour or reasons to quit or continue  
18  
19 smoking was not possible with a cross-sectional design. A third limitation is the absence of a  
20  
21 native mainstream (English-speaking) reference group, due to lack of resources. This could be a  
22  
23 problem for interpreting the additional ‘culturally specific’ beliefs, because these were not  
24  
25 elicited from mainstream population group. Nevertheless, to assess whether the beliefs we  
26  
27 identified in this study are really ‘culturally specific’, a cohort study with all significant beliefs  
28  
29 for main ethnic groups in the GVA, including mainstream population, might be useful.  
30  
31  
32  
33  
34  
35  
36  
37  
38

## 39 CONCLUSION

40  
41 The results of our study suggest that an effective anti-smoking campaign in the Chinese  
42  
43 community should go beyond traditional English language efforts, utilize Chinese resources, and  
44  
45 build upon existing cultural attitudes (such as the belief that smoking is inappropriate for young  
46  
47 people) and knowledge (such as health risks) about smoking. Particular attention should be paid  
48  
49 to differences between female and male smokers, and between younger and older smokers  
50  
51 related to their knowledge, beliefs and attitudes about smoking, and perceived barriers and  
52  
53 facilitators to smoking cessation. We also identified different beliefs and perceptions about the  
54  
55  
56

---

1  
2  
3 harms and benefits of smoking, based on language, age, and gender group. The findings indicate  
4  
5 the importance of addressing risk perceptions about the immediate and long-term consequences  
6  
7 of smoking. Therefore, future interventions can prove the applicability of a risk perception model  
8  
9 on smoking cessation among Mandarin and Cantonese speaking smokers. Despite finding  
10  
11 significant differences between the genders, educational level, ethnicity and age groups in our  
12  
13 study, we believe a larger sample size is needed to address this issue. The findings build a  
14  
15 window of opportunity to promote tailored cessation interventions incorporating cultural beliefs,  
16  
17 perceptions, and practices for Chinese immigrant communities.  
18  
19  
20  
21  
22  
23

### 24 **Practical Implications**

25  
26  
27 Our study identified the health beliefs and perceptions about smoking and its cessation among  
28  
29 Mandarin and Cantonese immigrants that could be considered by healthcare decision makers to  
30  
31 develop health promotion programs preventing smoking onset among younger population groups  
32  
33 in Chinese community. Interventions should take account of the specific profiles that Mandarin  
34  
35 and Cantonese immigrants in terms of knowledge, attitudes, beliefs and perceptions on their  
36  
37 smoking habits and patterns. Given the results of this study, we plan to conduct further research  
38  
39 to assess the applicability of a risk perception model to the smoking behavior of routine smokers  
40  
41 in the target immigrant communities. The model has been shown effective in terms of modifying  
42  
43 risk-taking behaviors, promoting positive perceptions, and improving self-efficacy that have  
44  
45 been applied for changing smoking habits/behavior .[37-39]  
46  
47  
48  
49  
50  
51  
52  
53  
54

### 55 **ACKNOWLEDGEMENTS**

1  
2  
3 We would like to thank the community members, facilitators, ethno-cultural serving agencies  
4 (SUCCESS), and key-informants from the Mandarin and Cantonese communities in the Greater  
5  
6 Vancouver Area who helped us since the initial steps of this research.  
7  
8

### 9 10 **FUNDING**

11  
12 This project was funded by a community grant from The Vancouver Foundation, Vancouver,  
13  
14 Canada.  
15

### 16 17 **COMPETING INTERESTS**

18  
19 We declare that there is no conflict of interest in terms of ownership of shares, consultancy,  
20  
21 speaker's honoraria or research grants from commercial companies or professional or  
22  
23 governmental organizations with an interest in the topic of the paper (the ICMJE form for  
24  
25 Disclosure of Potential Conflicts of Interest from the Corresponding Author is also attached to  
26  
27 this submission).  
28  
29

### 30 31 **CONTRIBUTOR STATEMENT**

32  
33 JMF and IP planned the conception and study design. IP prepared the proposal draft to the  
34  
35 funding agency and applied for the ethics approval. JS coordinated the study, recruited  
36  
37 participants, and facilitated the community involvement. IP analyzed and interpreted the study  
38  
39 data. IP and JS drafted the manuscript for important intellectual content.  
40  
41  
42

### 43 44 **DATA SHARING STATEMENT**

45  
46 No additional data available.  
47  
48  
49  
50  
51  
52  
53  
54

### 55 56 **REFERENCE LIST**



- 1  
2  
3  
4  
5  
6  
7  
8  
9  
10  
11  
12  
13  
14  
15  
16  
17  
18  
19  
20  
21  
22  
23  
24  
25  
26  
27  
28  
29  
30  
31  
32  
33  
34  
35  
36  
37  
38  
39  
40  
41  
42  
43  
44  
45  
46  
47  
48  
49  
50  
51  
52  
53  
54  
55  
56  
57  
58  
59  
60
1. Centers for Disease Control and Prevention. Tobacco Use. 2012. Available from:  
<http://www.cdc.gov/chronicdisease/resources/publications/aag/osh.htm> Accessed on June 20, 2014.
2. World Health Organization. Tobacco Free Initiative (TFI). 2014. Available from:  
[http://www.who.int/tobacco/health\\_priority/en/](http://www.who.int/tobacco/health_priority/en/) Accessed on June 18, 2014.
3. Haddad L, El-Shahawy O, Shishani K, et al. Cigarette use attitudes and effects of acculturation among Arab immigrants in USA: A preliminary study. *Health* 2012;4(10):785-793.
4. Robles GI, Singh-Franco D, & Ghin HL. A review of the efficacy of smoking-cessation pharmacotherapies in nonwhite populations. *Clin Ther* 2008;30(5):800-12.
5. Okuyemi K, Nollen N, & Ahluwalia J. Interventions to Facilitate Smoking Cessation. *Am Fam Physician* 2006;74(2):2620271.
6. Health Canada. Canadian Tobacco Use Monitoring Survey (CTUMS) 2010. 2010. Available at [http://www.hc-sc.gc.ca/hc-ps/tobac-tabac/research-recherche/stat/ctums-esutc\\_2010\\_graph-eng.php](http://www.hc-sc.gc.ca/hc-ps/tobac-tabac/research-recherche/stat/ctums-esutc_2010_graph-eng.php) Accessed on July 2, 2014.
7. Yan J, Xiao S, Ouyang D, et al. Smoking behavior, knowledge, attitudes and practice among health care providers in Changsha city, China. *Nicotine Tob Res* 2008; 10: 737-744.
8. Wu D, Ma GX, Zhou K, et al. The effect of a culturally tailored smoking cessation for Chinese American smokers. *Nicotine Tob Res* 2009;11(12):1448–1457.
9. Chen W. *Susceptibility to Smoking among Chinese-Canadian Non-smoking Adolescents*. Doctoral Dissertation, University of British Columbia. 2008. Available at

1  
2  
3  
4  
5  
6  
7  
8  
9  
10  
11  
12  
13  
14  
15  
16  
17  
18  
19  
20  
21  
22  
23  
24  
25  
26  
27  
28  
29  
30  
31  
32  
33  
34  
35  
36  
37  
38  
39  
40  
41  
42  
43  
44  
45  
46  
47  
48  
49  
50  
51  
52  
53  
54  
55  
56  
57  
58  
59  
60

[https://circle.ubc.ca/bitstream/handle/2429/942/ubc\\_2008\\_fall\\_chen\\_weihong.pdf?sequence=1](https://circle.ubc.ca/bitstream/handle/2429/942/ubc_2008_fall_chen_weihong.pdf?sequence=1) Accessed on July 2, 2014.

10. Yang G, Ma J, Liu N, et al. Smoking and passive smoking in Chinese - 2002. *Zhonghua Liu Xing Bing Xue Za Zhi* 2005;26:77-83.
11. Ksal H, Sayg A, Sarıman N, et al. Evaluation of Clinical and Functional Parameters in Female Subjects With Biomass Smoke Exposure. *Respir Care* 2013;58(3):424-430.
12. Statistics Canada. Some facts about the demographic and ethnocultural composition of the population. 2008. Available at <http://www.statcan.gc.ca/pub/91-003-x/2007001/4129904-eng.htm#2> Accessed on July 2, 2014.
13. BC Statistics. Population Estimates - Total Populations. 2010. Available at: <http://www.bcstats.gov.bc.ca/data/pop/pop/estspop.asp#totpop> Accessed on July 2, 2014.
14. Zeng XX, Chiu CH, Sun J, et al. A Phone-Counseling Smoking-Cessation Intervention for Male Chinese Restaurant Workers. *J Commun Health* 2010(3):1-12.
15. Gallup World. Three in 10 Chinese Adults Smoke. 2012. Available at: <http://www.gallup.com/poll/152546/three-chinese-adults-smoke.aspx> Accessed on July 2, 2014.
16. World Health Organization. Tobacco in China. Western Pacific Region. 2014. Available at: <http://www.wpro.who.int/china/mediacentre/factsheets/tobacco/en/> Accessed on June 20, 2014.
17. Poureslami I, Doyle-Waters MMR, Nimmon L, et al. Hearing the community voice: methodological issues in developing asthma self-management educational materials for immigrant communities. In Agyemang C, Airhihenbuwa CO, de-Graft Aikins A (eds.),

1  
2  
3  
4  
5  
6  
7  
8  
9  
10  
11  
12  
13  
14  
15  
16  
17  
18  
19  
20  
21  
22  
23  
24  
25  
26  
27  
28  
29  
30  
31  
32  
33  
34  
35  
36  
37  
38  
39  
40  
41  
42  
43  
44  
45  
46  
47  
48  
49  
50  
51  
52  
53  
54  
55  
56  
57  
58  
59  
60

*Ethnicity: Theories, International Perspectives and Challenges*. Hauppauge NY: Nova Publishers 2014:125-156.

18. Faridi Z, Grunbaum JA, Gray BS, et al. 2007. Community-based participatory research: necessary next steps. *Prev Chronic Dis*. Available at: [http://www.cdc.gov/pcd/issues/2007/jul/06\\_0182.htm](http://www.cdc.gov/pcd/issues/2007/jul/06_0182.htm) Accessed on June 21, 2014.
19. Israel BA, Schulz AJ, Parker EA, et al. Review of community-based research: assessing partnership approaches to improve public. *Annu.Rev.Public Health*.1998;19:173–202.
20. Poureslami I, Shum J, Cheng N, et al. Does Culture or Illness Change a Smoker’s Perspective on Cessation? *Am J Health Behav* 2014;38(5):33-39.
21. Poureslami I, Shum J, & FitzGerald JM. Differences in attitudes and beliefs about smoking among smoker and ex-smoker COPD patients. *J Health Care Poor* 2014 (Under review).
22. Poureslami I, Rootman I, Doyle-Water MMR, et al. Health literacy, language, and ethnicity-related factors in newcomer asthma patients to Canada: a qualitative study. *J Immigr Minor Health*.2011;13(2):315-322.
23. Klassen AF, Gulati S, Watt L, et al. Immigrant to Canada, newcomer to childhood cancer: a qualitative study of challenges faced by immigrant parents. *Psycho-oncol* 2012;21(5):558-562.
24. Scarinci IC, Silveira AF, Figueiredo dos Santos D, Beech BM. Sociocultural factors associated with cigarette smoking among women in Brazilian worksites: a qualitative study. *Health Promot. Int.* (2007) 22 (2): 146-154.

- 1  
2  
3  
4  
5  
6  
7  
8  
9  
10  
11  
12  
13  
14  
15  
16  
17  
18  
19  
20  
21  
22  
23  
24  
25  
26  
27  
28  
29  
30  
31  
32  
33  
34  
35  
36  
37  
38  
39  
40  
41  
42  
43  
44  
45  
46  
47  
48  
49  
50  
51  
52  
53  
54  
55  
56  
57  
58  
59  
60
25. Dawson AP, Cargo M, Stewart H, et al. Aboriginal Health Workers experience multilevel barriers to quitting smoking: a qualitative study. *Int J Equity Health* 2012;11: 27.
26. North American Quitline Consortium (NAQC). The Use of Quitlines among Priority Populations in the U.S.: Lessons from the Scientific Evidence. 2011. Available at: [http://c.ymcdn.com/sites/www.naquitline.org/resource/resmgr/Issue\\_Papers/IssuePaperTheUseofQuitlinesA.pdf](http://c.ymcdn.com/sites/www.naquitline.org/resource/resmgr/Issue_Papers/IssuePaperTheUseofQuitlinesA.pdf) Accessed on July 15, 2014.
27. Maryland Department of Health and Mental Hygiene. Exploring cultural, psychosocial, and environmental factors influencing tobacco use among Asian Americans, Hispanics, African Americans and American Indians in Maryland. Cigarette Restitution Fund's Tobacco Use Prevention and Cessation Program. 2008. Available at: [https://sph.umd.edu/epib/cultural\\_competency/Exploring%20cultural,%20psychosocial,%20and%20environmental%20factors%20influencing%20tobacco%20use%20among%20Asian%20Americans,%20Hispanics,%20African%20Americans%20and%20American%20Indians%20in%20Maryland.pdf](https://sph.umd.edu/epib/cultural_competency/Exploring%20cultural,%20psychosocial,%20and%20environmental%20factors%20influencing%20tobacco%20use%20among%20Asian%20Americans,%20Hispanics,%20African%20Americans%20and%20American%20Indians%20in%20Maryland.pdf) Accessed on July 15, 2014.
28. Binnal A, Rajesh G, Ahmed J, et al. Insights into Smoking and its Cessation among Current Smokers in India. *Asian Pacific J Cancer Prev.* 2013; 14 (5): 2811-2818.

- 1  
2  
3  
4  
5  
6  
7  
8  
9  
10  
11  
12  
13  
14  
15  
16  
17  
18  
19  
20  
21  
22  
23  
24  
25  
26  
27  
28  
29  
30  
31  
32  
33  
34  
35  
36  
37  
38  
39  
40  
41  
42  
43  
44  
45  
46  
47  
48  
49  
50  
51  
52  
53  
54  
55  
56  
57  
58  
59  
60
29. Yang J, Hammond D, Driezen P, et al. Health knowledge and perception of risks among Chinese smokers and non-smokers: Findings from the Wave 1 ITC China Survey. *Tob Control* 2010;19(Supplement 2):i18-i23.
30. Siahpush M, McNeill A, Hammond D, Fong GT. Socioeconomic and country variations in knowledge of health risks of tobacco smoking and toxic constituents of smoke: results from the 2002 International Tobacco Control (ITC) Four Country Survey. *Tobacco Control* 2006; 15(Suppl III):iii65–iii70. doi: 10.1136/tc.2005.013276.
31. Oncken C, McKee S, Krishnan-Sarin S, et al. Knowledge and perceived risk of smoking-related conditions: a survey of cigarette smokers. *Preventive Medicine*. 2005; 40: 779–784.
32. Roddy E, Antoniak M, Britton J, et al. Barriers and motivators to gaining access to smoking cessation services amongst deprived smokers – a qualitative study. *BMC Health Services Research* 2006;6:147-154.
33. Litmus research organization. Quitting Motivations and Barriers Qualitative Research. The Quit Group. 2005. Available at:  
<http://www.quit.org.nz/file/research/FINAL%20Litmus%20report-Quitting%20Motivations%20and%20Barriers.pdf> Accessed on July 15, 2014.

- 1  
2  
3  
4  
5  
6  
7  
8  
9  
10  
11  
12  
13  
14  
15  
16  
17  
18  
19  
20  
21  
22  
23  
24  
25  
26  
27  
28  
29  
30  
31  
32  
33  
34  
35  
36  
37  
38  
39  
40  
41  
42  
43  
44  
45  
46  
47  
48  
49  
50  
51  
52  
53  
54  
55  
56  
57  
58  
59  
60
- 34.** Richardson K. Smoking, Low Income and Health Inequalities: Thematic Discussion Document. Action on Smoking and Health and the Health Development Agency. 2001. Available at: [http://www.ash.org.uk/files/documents/ASH\\_86.pdf](http://www.ash.org.uk/files/documents/ASH_86.pdf) Accessed on July 15, 2014.
- 35.** Gwaltney CJ, Metrik J, Kahler CW, Shiffman S. Self-Efficacy and Smoking Cessation: A Meta-Analysis. *Psychol Addict Behav* 2009;23(1):1-20.
- 36.** Dijkstra A, & De Vries H. Self-efficacy expectations with regard to different tasks in smoking cessation. *Psychol Health* 2000;15(4):501-511.
- 37.** Song AV, Morrell HE, Cornell JL, et al. Perceptions of Smoking-Related Risks and Benefits as Predictors of Adolescent Smoking Initiation. *Am J Public Health* 2009;99(3):487-492.
- 38.** Aryal UR, Petzold M, & Krettek A. Perceived risks and benefits of cigarette smoking among Nepalese adolescents: a population-based cross-sectional study. *BMC Public Health* 2013,13:187-196.
- 39.** Harris JK, Karamelic-Muratovic A, Herbers SH, et al. Perceptions of Personal Risk About Smoking and Health Among Bosnian Refugees Living in The United States. *J Immigrant Minority Health* 2012;14(3):413-919.

1  
2  
3  
4  
5  
6  
7  
8  
9 **Title: Assessment of beliefs and risk perceptions on about smoking and smoking**  
10 **cessation in Mandarin and Cantonese immigrant Chinesespeaking adult smokers residing**  
11 **in Vancouver, Canada: Implications for intervention models a cross-sectional study**  
12

13  
14 **Corresponding author:**

15 Dr. J. Mark FitzGerald  
16 The Lung Centre, 7<sup>th</sup> Floor  
17 Gordon and Leslie Diamond Health Care Centre  
18 2775 Laurel Street  
19 Vancouver, BC, Canada  
20 V5Z 1M9  
21 Email: [mark.fitzgerald@vch.ca](mailto:mark.fitzgerald@vch.ca)  
22 Phone: 604-875-4122  
23  
24

25  
26 **Co-authors:**

27 Dr. Iraj Poureslami  
28 UBC, Faculty of Medicine, Respiratory Medicine Division  
29 Centre for Clinical Epidemiology and Evaluation (C2E2)  
30 Vancouver General Hospital – Research Pavilion  
31 716-828 West 10<sup>th</sup> Avenue  
32 Vancouver, BC, Canada  
33 V5Z 1M9  
34

35  
36 Jessica Shum  
37 UBC, Faculty of Medicine, Respiratory Medicine Division  
38 Centre for Clinical Epidemiology and Evaluation (C2E2)  
39 Vancouver General Hospital – Research Pavilion  
40 828 West 10<sup>th</sup> Avenue  
41 Vancouver, BC, Canada  
42 V5Z 1M9  
43  
44

45  
46 **Keywords:** smoking, Chinese communities, beliefs, risk perceptions, smoking cessation  
47

48 **Word count:** 4722

49 **Abstract:** 2993255  
50  
51

1  
2  
3  
4  
5  
6  
7  
8  
9  
10  
11  
12  
13  
14  
15  
16  
17  
18  
19  
20  
21  
22  
23  
24  
25  
26  
27  
28  
29  
30  
31  
32  
33  
34  
35  
36  
37  
38  
39  
40  
41  
42  
43  
44  
45  
46  
47  
48  
49  
50  
51  
52  
53  
54  
55  
56  
57  
58  
59  
60

**What this paper adds:**

1. Understanding the beliefs, perceptions, and practice of Chinese Mandarin and Cantonese communities about smoking and smoking cessation creates opportunities to tailor smoking cessation interventions according to the needs of these communities.
2. Previously, most studies have applied an identical risk perception model on smoking behaviour assessments among young vs. old and male vs. female smokers. However, our study identified that risk perception about smoking and smoking consequences differ in the smoking population group based on their age and gender. Therefore, a different model of risk perception should be designed and applied considering the age and gender of participants.
3. Despite existing knowledge that Chinese communities are heterogeneous, our study found that smoking habit, perceptions, beliefs, and practice differ in Mandarin speaking compared to Cantonese speaking Chinese.



**ABSTRACT**

**Objectives:** We aimed to conduct culturally based participatory research to assess cultural and belief contexts for smoking behaviours within Mandarin and Cantonese communities. Outcome variables were smoking-related knowledge, smoking patterns, attitudes and beliefs, and perceived barriers and facilitators to successful cessation. We explored cultural and belief contexts for smoking habits within Mandarin and Cantonese speaking communities. The aim was to identify their perceived barriers and facilitators to successful cessation. We attempted to translate existing knowledge and our previous experience in designing a conceptual framework to conduct culturally based participatory research.

**Design:** A community-based approach was applied involving smokers, community key-informants, and professionals in study design and implementation. Initially, focus groups were conducted and findings were used to develop study instrument. Participants responded once to study questionnaire after informed consent.

**Methods:** A mixed qualitative and quantitative approach was applied, involving community members, key informants, and professionals in the design and implementation of the cross-sectional research. Three focus groups were conducted with 16 smokers from the target communities to assess their viewpoints on study framework and measurement tool.

**Setting:** Community based in the Greater Vancouver Area, Canada.

**Participants:** 16 Chinese smokers participated in focus groups and subsequently, 167 current Chinese immigrant (137 males and 30 females) smokers from Mandarin and Cantonese communities, recruited with the help of community agencies and collaborating physicians, were enrolled in a cross-sectional study.

1  
2  
3  
4  
5  
6  
7  
8  
9  
10  
11  
12  
13  
14  
15  
16  
17  
18  
19  
20  
21  
22  
23  
24  
25  
26  
27  
28  
29  
30  
31  
32  
33  
34  
35  
36  
37  
38  
39  
40  
41  
42  
43  
44  
45  
46  
47  
48  
49  
50  
51  
52  
53  
54  
55  
56  
57  
58  
59  
60

**Results:** We found that a majority believed smoking was harmful on their health. Younger smokers (<35 years of age) did not mind smoking in front of young children compared to older smokers (>35 years of age) (p<0.001). People with high school or lower levels of education believed that they would benefit more from smoking than suffering from withdrawal symptoms compared to better educated smokers (p<0.05). Mandarin smokers were significantly more likely to encourage others to quit than Cantonese smokers (p<0.05). Many indicated not receiving adequate support from care providers and lack of access to culturally and linguistically appropriate cessation programs impacted on their ability to quit smoking.

Participants were 167 current smokers, (137 males and 30 females) recruited with the help of community agencies and collaborating physicians. We assessed smoking patterns, beliefs, and perceptions and found a majority believed that smoking was harmful on their health. Younger smokers (<35 years of age) were more likely to not mind smoking in front of young children compared to older smokers (≥35 years of age) (p<0.001). People with high school or lower levels of education believed that they would benefit more from smoking than suffering from withdrawal symptoms compared to the higher educated smokers (p<0.05). Mandarin speaking smokers were significantly more likely to encourage others to quit than Cantonese speaking smokers (p<0.05). In addition, many indicated not receiving adequate support from their care providers and lack of access to culturally and linguistically appropriate cessation programs preventing their attempt to quit smoking.

**Conclusion:** Our study highlighted the importance of tobacco beliefs among control regulations ~~for~~ Mandarin and Cantonese speaking immigrants with limited access to healthcare information and for younger smokers whose attention to health consequences of smoking may be limited as well. Study

1  
2  
3  
4  
5  
6  
7  
8  
9  
10  
11  
12  
13  
14  
15  
16  
17  
18  
19  
20  
21  
22  
23  
24  
25  
26  
27  
28  
29  
30  
31  
32  
33  
34  
35  
36  
37  
38  
39  
40  
41  
42  
43  
44  
45  
46  
47  
48  
49  
50  
51  
52  
53  
54  
55  
56  
57  
58  
59  
60

Participants ~~of this study~~ were generally aware of the health risks and were willing to quit.

Access to appropriate cessation programs would fulfill their willingness.

For peer review only

## Article Summary

### Strengths and Limitations of this study

- We undertook a community-based participatory approach, with community key-informants and healthcare providers were heavily involved in all aspects of the study such as design, instrument development, implementation, community outreach, and dissemination. These key-stakeholders are important allies in developing culturally and linguistically appropriate smoking cessation interventions.
- Our study provides evidence that attitudes and beliefs of cigarette smoking differ between language, age, and gender groups. The differences with regards to tobacco smoking appear to be related to attitudes or knowledge.
- The results build a window of opportunity to promote tailored cessation interventions incorporating cultural beliefs, perceptions, and practices for Chinese immigrant communities.
- We used a convenience sampling method, which may not reflect the actual smoking prevalence and patterns of Chinese Mandarin and Cantonese immigrants in the Greater Vancouver Area.
- All responses were by self-report and validation of smoking behaviour or reasons to quit or continue smoking was not possible with a cross-sectional design.

## BACKGROUND

Tobacco use remains the leading cause of preventable morbidity and mortality in the world.[1-3] In Canada, its use has been declining slower than expected in spite of increased taxation on cigarettes and more stringent tobacco policies put into place.[3] In order to accomplish the goal of reducing the rate of smokers among Canadian adults, smoking has to be addressed among all sub-populations, especially those with a higher smoking prevalence than the general population. Global studies have shown that those who stop smoking greatly reduce their risk of developing cardio pulmonary disease and that in general the longer the period of cessation, the greater is the reduction in risk.[4,5] Minority and immigrant communities in Canada may be at greater risk of smoking-related illnesses.[6] Reasons include lack of knowledge and awareness about the link between smoking and lung disease;[7] limited access to smoking cessation programs due to cultural, language, and systemic barriers; [8] and smoking behaviour.[9,10] In addition, many immigrants from low-and-middle-income countries have [had prior](#) significant exposure to biomass and bio-fuel as well as smoking which further increases their risk.[11] This is particularly true among immigrants from Mandarin and Cantonese speaking communities (the largest immigrant minority groups living in the BC and Canada)[12,13] where smoking rates remains high.[9,10] Such extensive tobacco use among immigrants may be due to the fact that smoking is a largely integrated into the Chinese male culture.[14] Nearly two of every three adult men in China are smokers.[15,16] It is, therefore, empirically relevant to try to understand this immigrant group's smoking knowledge, behaviours, and habits and develop culturally appropriate educational and counselling services to improve tobacco prevention attempts and promote cessation. Maximizing tobacco control for newcomers requires a special understanding of smoking pattern and beliefs of new immigrant populations. [The objectives of this study were:](#)

1  
2  
3  
4  
5  
6  
7  
8  
9  
10  
11  
12  
13  
14  
15  
16  
17  
18  
19  
20  
21  
22  
23  
24  
25  
26  
27  
28  
29  
30  
31  
32  
33  
34  
35  
36  
37  
38  
39  
40  
41  
42  
43  
44  
45  
46  
47  
48  
49  
50  
51  
52  
53  
54  
55  
56  
57  
58  
59  
60

1) to explore smoking use patterns, smoking-related knowledge, beliefs and attitudes, and perceived barriers and facilitators to smoking cessation among Mandarin and Cantonese speaking communities living in the Greater Vancouver Area (GVA), and 2) to assess the effectiveness of socio-cultural and environmental factors which influenced the onset of smoking and smoking habits (continued smoking) among the study participants. We were also interested to identify differences in above mentioned variables between males and females, Mandarin and Cantonese, and between age and education level groups. The purpose of this study was to explore smoking use patterns, including beliefs, attitudes and behaviour among Mandarin and Cantonese speaking communities living in the Greater Vancouver Area (GVA). We aimed to specifically identify and differentiate the smoking perspectives between males and females, Mandarin and Cantonese, and between age and education level groups. The identification of tobacco use and other related patterns ~~that would be identified here~~ may help facilitate the development of community-based culturally appropriate interventions targeting tobacco use and would be sensitive helpful for Chinese immigrants in future research.

## METHODS

### Project Design

This multi-stage ~~mixed methods~~cross-sectional study employed both qualitative and quantitative components within an over-arching community-based participatory framework. The first stage comprised the development and testing of a measurement instrument for the survey study. The second stage was a quantitative study assessing the outcome variables including smokers' awareness of smoking and its cessation, attitudes and beliefs about smoking harms and benefits, and cultural norms of smoking in their community.

1  
2  
3  
4  
5  
6  
7  
8  
9 ~~smokers' knowledge, attitudes, beliefs, and smoking pattern.~~

10  
11 The study was conducted between January 2013 and June 2014, allowing for participation and  
12 collaboration between members of the Mandarin and Cantonese communities and other key-  
13 stakeholders such as professionals and researchers in the research process.[17-19] Connections  
14 and networking were built with community key-informants and community agencies (e.g.,  
15 SUCCESS (United Chinese Community Enrichment Services Society), Vancouver Coastal  
16 Health community organizations, etc.) supporting active involvement and contribution in study  
17 design, development and implementation. Community collaborators provided assistance with  
18 recruitment of Mandarin and Cantonese smokers as well as input and suggestions on the  
19 development of focus group and interview questions. They recruited two males and two females  
20 who were members of the community, fluent in Mandarin and Cantonese, to work in alliance  
21 with 4 female bilingual Chinese research assistants. All community facilitators and research  
22 assistants received necessary training prior the study. The training included approaches on how  
23 to best recruit study participants, understanding of the project's aims and objectives, how to  
24 conduct focus groups and individual interviews with smokers from their own communities, and  
25 ideas on how the team could work together effectively in collection of the best information  
26 possible on Chinese smokers' knowledge, beliefs and attitudes about harms and benefits of

27  
28  
29  
30  
31  
32  
33  
34  
35  
36  
37  
38  
39 possible on Chinese smokers' knowledge, beliefs and attitudes about harms and benefits of  
40 smoking, and socio-cultural and environmental factors affecting smoking and smoking cessation.  
41 beliefs, attitudes, and perspectives regarding smoking and smoking cessation.

42  
43 ~~beliefs, attitudes, and perspectives regarding smoking and smoking cessation.~~The community  
44 researchers transcribed and translated focus group and interview discussions and we applied the  
45 collected information in the development of a study measurement tool and conceptual  
46 framework. In addition, findings from our previous qualitative smoking study (conducted with  
47  
48  
49  
50

Formatted: Font: Times New Roman, 12 pt

1  
2  
3  
4  
5  
6  
7  
8  
9  
10  
11  
12  
13  
14  
15  
16  
17  
18  
19  
20  
21  
22  
23  
24  
25  
26  
27  
28  
29  
30  
31  
32  
33  
34  
35  
36  
37  
38  
39  
40  
41  
42  
43  
44  
45  
46  
47  
48  
49  
50  
51  
52  
53  
54  
55  
56  
57  
58  
59  
60

smokers from the same communities) were used in the development of the study design and measurement tool.[20]

### Ethics

Ethics approval was obtained for this study from the University of British Columbia Research Ethics Board. All participants signed a written consent form in their preferred written language (Chinese Simplified, Chinese Traditional, or English) translated by the bilingual researchers who clearly explained the study information, rationale, aims, goals and objectives, and how their involvement would be like prior to the study.

### Study Measurement Tool

We initially developed the study measurement tool by determining whether any English or Chinese language questionnaires were currently in use to assess attitudes and beliefs re smoking in Chinese community. A literature search and an informal survey of immigrant-serving community agencies did not find any such instrument. Given the absence of a validated assessment questionnaire in the target languages, a new measurement tool was developed over a 4-month period. Development of the study measurement tool began with information collected from initial focus group session participants (n=143) and individual interviews (n=2), review of relevant literature that addressed knowledge of, attitudes to, and behaviors in relation to tobacco use, and also our previous smoking-related qualitative studies with Mandarin and Cantonese current and ex-smokers.[20,21] Moreover, a professional measurement tool developer (a PhD in the socio-psychology-research and evaluation field from University of British Columbia) with expertise in developing mixed open-ended and closed-format questionnaires was involved in the



1  
2  
3  
4  
5  
6  
7  
8  
9 face and content validation and finalization of the measurement tool. The team and the  
10 measurement developer have the expertise to identify and differentiate between beliefs, attitudes  
11 and perceptions, as well as the socio-cultural and environmental aspects of smoking and its  
12 cessation. Each set of variables were identified and separated by heading-title in the  
13 questionnaire. The internal consistency of the data was checked by test-retesting reliability,  
14 where the study questionnaire was administered to 5 smokers and tested again a week after and  
15 the results of the initial assessment and retest were compared. Also, more advanced process was  
16 applied by calculating Cronbach Alpha and a coefficient was (.89).  
17  
18  
19  
20  
21  
22  
23  
24  
25  
26  
27

28 The final questionnaire covered current smoking knowledge, beliefs, and attitudes about  
29 smoking and its cessation~~egarettes~~, and ~~exposure to smoking cessation aids~~socio-cultural and  
30 environmental factors that promote or prevent smoking onset and continuation. The tool included  
31  
32 70 questions covering demographics and concepts on smoking onset, smoking characteristics,  
33  
34 perceptions, experience in quitting, social relationships, and cultural and environmental  
35  
36 influences and were in the format of yes/no, true/false, multiple choice, and open-ended  
37  
38 questions (The study measurement tool ~~can may~~ be found as Supplementary File 1 in the Appendix). The questionnaire  
39  
40 was also reviewed by a number of key-informants and health practitioners (n=9) from the target  
41  
42 communities who provided feedback and comments re the questionnaire and checked its face  
43  
44 and content validity. The bilingual Chinese research assistants worked collaboratively together  
45  
46 translating the study measurement tool to Chinese Simplified and Traditional formats. The  
47  
48 translations were reviewed by secondary (back-up) translators from the target communities who  
49  
50 were introduced by the collaborating immigrant agencies for accuracy and correctness. The tool  
51  
52

1  
2  
3  
4  
5  
6  
7  
8  
9 was then reviewed by the community key-informants and professionals for further  
10 crosschecking. Finally we pilot tested the questionnaire with selected smokers and ex-smokers  
11 from the Chinese communities (n=5) to confirm validation of the measurement tool and for  
12 cultural relevance and clarification, as well as translation purposes including understandability,  
13 acceptability, and applicability. Suggestions were integrated into a revised version.  
14 ~~and it was then pilot tested with selected smokers and ex-smokers from the Chinese~~  
15 ~~communities (n=5) to further validate the measurement tool and for cultural relevance and~~  
16 ~~clarification, as well as translation purposes including understandability, acceptability, and~~  
17 ~~applicability, and suggestions were revised accordingly.~~

## 27 **Participant Recruitment**

28  
29 Eligibility criteria for participants were adults ( $\geq 21$  years old) who were current smokers  
30 (defined by having smoked at least 5 cigarettes per day during the past 30 days), Chinese descent  
31 (either Mandarin or Cantonese speaking) and be immigrants to Canada or children of Chinese  
32 immigrants. Participants were recruited from within the communities using a variety of outreach  
33 methods such as posting flyers and referral applied from previous studies and through network  
34 with community agency collaborators.[17,22,23] In total, 16 Chinese smokers participated in  
35 initial focus groups and interviews and subsequently 167 (137 males and 30 females) were  
36 interviewed, from which 93 were Mandarin speaking and ~~74~~ 73 were Cantonese speaking.

37 In terms of age category, 90 participants were <35 years of age and 76 were  $\geq 35$  years of age.

38 Our intended sample size was 150 Chinese smokers aiming to identify mean differences in  
39 knowledge, beliefs, attitudes, and practices related to smoking and experience in smoking  
40 cessation between age, gender, education, and ethnicity groups.

90 participants were <35 years of age and 76 were ≥35 years of age. Our targeted goal and objective was to assess variations in 150 Chinese smokers' knowledge, beliefs, attitudes, and practices related to smoking and experience in smoking cessation and we exceeded this aim.

### Data Collection

Data was collected through administration of study questionnaire and individual interviews.

Interview sessions were conducted at places and times of convenience for participants: e.g., participants' homes, community centres, and our research centre. Printed consent forms were

explained and signed preceding the interview. ~~Data were collected from May 2013 through April~~

~~2014.~~ Modest honoraria were paid to cover time, travel, and parking expenses. Community

research assistants conducted the interviews in Mandarin, ~~Cantonese or Cantonese, or English~~

and the participants filled in a self reported Chinese Simplified ~~or Chinese Traditional, or~~

~~English questionnaire Traditional questionnaire~~ while the research assistant ~~were~~ available to

answer any questions that they would have had, ~~or ask the responders to elaborate the given~~

~~information in the open-ended questions. Each interview was conducted by two interviewers:~~

~~one with an academic perspective (a research assistant), and one from community who acted as a~~

~~facilitator. The two interviewers took notes during interviews including verbal and non-verbal~~

~~communication by the participants and reviewed their notes at the end of each interview aiming~~

~~to improve the accuracy of the information, capturing smokers' smoking beliefs, perceptions,~~

~~and also their comments about cultural images of smoking and its cessation.~~ In some instances

(e.g., old smokers or low literate people), the research assistants ~~assisted by~~ administered the

study questionnaire verbally while taking notes throughout the entire interview.

1  
2  
3  
4  
5  
6  
7  
8  
9  
10  
11  
12  
13  
14  
15  
16  
17  
18  
19  
20  
21  
22  
23  
24  
25  
26  
27  
28  
29  
30  
31  
32  
33  
34  
35  
36  
37  
38  
39  
40  
41  
42  
43  
44  
45  
46  
47  
48  
49  
50  
51  
52  
53  
54  
55  
56  
57  
58  
59  
60

### Data analysis

SPSS v20 (2012) was used for all statistical tests. Descriptive statistical tests were used and the results were presented in tables and graphs. Relevant inferential statistics were calculated for the entire sample and stratified according to age, gender, level of education, language of origin, and smoking patterns. The data were not normally distributed, and non-parametric tests were therefore used: e.g. (chi-square) test for nominal data, Mann–Whitney test for ordinal data with two groups, and Kruskal–Wallis test for more than two groups with ordinal data. Binary logistic regression was used to determine the effects of demographic s variables on beliefs, attitudes, knowledge and behaviour the outcome variables. All data were examined regarding distributions and trends in the data, and the level of significance was set at the  $P < 0.05$  level.

### Sample Size Calculation

With a total sample size of 167 subjects for the cross-sectional study, we estimated that we could identify mean differences between different age, gender, language and education level groups and with an effect size of 0.45 with 80% statistical power and a two-sided significance level of  $P < 0.05$ .

### FINDINGS

Between May 2013 and April 2014, wWe recruited and enrolled 167 current smokers in the GVA. **Table 1** describes characteristics of the study sample for both Mandarin (55.7%, n=93) and Cantonese (44.3%, n=74). The participants included predominately males (82%, n=137).

The median age was 35 and we used this cut off point for younger/older groups, as used

previously from our qualitative studies conducted with Chinese community smokers,[20]

allowing us to identify these differences in perspective. ~~90 participants on the study were <35 years of age and 76 were 35 and older.~~

**Table 1. Participant characteristics**

|                             | N                            | %                           |
|-----------------------------|------------------------------|-----------------------------|
| <b>Gender</b>               |                              |                             |
| Male                        | 137                          | 82                          |
| Female                      | 30                           | 18                          |
| <b>Language</b>             |                              |                             |
| Mandarin                    | 93                           | 55.7                        |
| Cantonese                   | 74                           | 44.3                        |
| <b>Age</b>                  |                              |                             |
| <35                         | <del>105</del> <sup>90</sup> | <del>63</del> <sup>54</sup> |
| ≥35                         | <del>62</del> <sup>76</sup>  | <del>37</del> <sup>46</sup> |
| <b>Education Level</b>      |                              |                             |
| High school under           | 87                           | 52                          |
| University degree and above | 80                           | 48                          |

### Smoking-related knowledge and reasons for starting smoking

Knowledge of smoking consequences is an important factor to consider when designing smoking cessation programs or implementing health promotion interventions, especially to prevent onset of smoking among young people.[2,8] Almost an equal number (23%) of Mandarin and Cantonese smokers indicated that they were not aware of smoking side effects when they started smoking. Table 2 provides the breakdown of smoking-related knowledge by gender, age, and education level.

**Table 2. 'At the time you started smoking, did you know the side effects of smoking?'**

|               | <b>Yes</b> |   | <b>No</b> |   |
|---------------|------------|---|-----------|---|
|               | N          | % | N         | % |
| <b>Gender</b> |            |   |           |   |

1  
2  
3  
4  
5  
6  
7  
8  
9  
10  
11  
12  
13  
14  
15  
16  
17  
18  
19  
20  
21  
22  
23  
24  
25  
26  
27  
28  
29  
30  
31  
32  
33  
34  
35  
36  
37  
38  
39  
40  
41  
42  
43  
44  
45  
46  
47  
48  
49  
50  
51  
52  
53  
54  
55  
56  
57  
58  
59  
60

|                             |     |    |    |    |
|-----------------------------|-----|----|----|----|
| Male                        | 105 | 77 | 32 | 23 |
| Female                      | 22  | 73 | 8  | 27 |
| <b>Age</b>                  |     |    |    |    |
| <35                         | 90  | 86 | 15 | 14 |
| ≥35                         | 38  | 62 | 24 | 39 |
| <b>Education Level</b>      |     |    |    |    |
| High school under           | 61  | 70 | 26 | 30 |
| University degree and above | 67  | 84 | 13 | 16 |

We also aimed to determine the *socio-cultural and environmental* factors which influenced the onset of smoking among the study participants.[24] In this study, we defined social factors as smoking during the gatherings, being offered cigarettes by peers (a cultural norm in this community), smoking to feel being accepted, etc. On average for 45% (n=75) of participants, 'social factors' were a trigger to start smoking, while it was the number one trigger for male smokers and smokers with who were 35 years or over with an equal rate of 53%. Although 50% of females mentioned 'emotional factors' as a contributor to starting smoking, only 22% (on average) of males cited these as factors for them. Likewise, 'environmental factors' were considered by only 20% of participants as a factor in starting to smoke, while 50% of Mandarin smokers mentioned environmental factors as a major trigger for them to start smoking. A smoking friend was mentioned by most of participants (66.3%) as someone in their social network when starting smoking, compared to classmate (48.5%), family (29%), and work-related colleagues (28%). An interesting observation was that 50% of female smokers in the study identified having a family member who smoked when they first started smoking.

#### Smoking beliefs, perceptions, and attitudes

For more than 60% of smokers, the main reasons to smoke regularly were the beliefs that smoking 'relaxed them' and 'helped them feel less stress': while 59% (n=81) of male smokers

selected these factors, only 47% (n=14) of female smokers said so. Multiple factors affected males to become regular smokers. Mandarin and Cantonese speaking smokers equally chose relaxation (54%), with more Mandarin believing that smoking helped them to cope with stress (67%) compared to Cantonese smokers (54%), the differences were not statistically significant. Moreover, over 60% of the participants said they smoke when they 'are having a break' and finally, less than 12% of the participants believed that smoking helped them to 'fit in with other people'. This rate was 20% among females (n=6) and 19% (n=15) among highly educated smokers. Table 3 provides the breakdown of the triggers to smoke.

**Table 3.** 'Smoking relaxes me and makes me feel less stress.'

|                             | Relaxation |    | Less stress |      |
|-----------------------------|------------|----|-------------|------|
|                             | N          | %  | N           | %    |
| <b>Gender</b>               |            |    |             |      |
| Female                      | 22         | 73 | 21          | 70   |
| Male                        | 82         | 60 | 81          | 59   |
| <b>Age</b>                  |            |    |             |      |
| <35                         | 73         | 70 | 71          | 68   |
| ≥35                         | 31         | 51 | 31          | 51   |
| <b>Education Level</b>      |            |    |             |      |
| High school under           | 50         | 58 | 45          | 52   |
| University degree and above | 55         | 69 | 50          | 62.5 |

We were also interested to identify the *social and cultural* aspects of smoking habits (continued smoking). When asked the question of whether 'most people in my culture smoke' to assess participants' perceived commonality of smoking in their communities, there was a significant difference between male and female participants ( $\chi^2 = 5.424$ ,  $df = 1$ ,  $P < 0.05$ ); more males (n=46, 34%) believed that smoking was a cultural habit in their community than females (n=17, 57%) did. Similar findings were observed between Mandarin and Cantonese ( $\chi^2 = 5.182$ ,  $df = 1$ ,  $P < 0.05$ ); more Mandarin (n=65) answered yes to the question than Cantonese smokers (n=39).

1  
2  
3  
4  
5  
6  
7  
8  
9 Many participants (61%) indicated they normally smoked when they were 'with friends'; with  
10 the highest proportion reported among the <35 years old participants (82%) and male  
11 participants (70%). Remarkably, 70% of the <35 years old participants indicated they smoked  
12 when they had alcohol. The rate was 60% among female participants, 57% among males, and  
13 57% among both Mandarin and Cantonese smokers. In terms of attitudes towards exposing  
14 others to second or third-hand smoke, we asked participants 'do you mind smoking in front of  
15 non-smokers' ? Younger smokers (<35 years of age) were more likely (n=72) to mention that  
16 they did not mind smoking in front of non-smokers compared to older smokers (>35 years of  
17 age) (n=52). The mean difference was significant ( $\chi^2 = 7.133$ ,  $df = 1$ ,  $P < 0.01$ ). Also, when the  
18 participants were asked whether they minded smoking in front of young children, similarly, more  
19 younger smokers (<35 years of age) (n=97) mentioned that they 'did not mind smoking in front  
20 of young children' than the older smokers (n=55) and the difference was significant ( $\chi^2 = 5.123$ ,  
21 df = 1,  $P < 0.05$ ). We also aimed to assess smokers' viewpoints regarding second hand smoking  
22 and its harm. We asked whether 'second and third hand smoke was as harmful as first hand  
23 smoke', again, relatively more males said 'no' when compared to female smokers (n= 40 and n=  
24 10, respectively) and the difference was significant ( $\chi^2 = 4.736$ ,  $df = 1$ ,  $P < 0.05$ ). Finally, we  
25 assessed smokers' beliefs about their own smoking pattern with a self-reported question of 'I  
26 have a smoking routine/pattern'. No significant differences were identified between gender, age,  
27 and language groups. However, we found that more people with high school education or less  
28 mentioned they didn't have a routine/pattern (n=30) compared to people with higher education  
29 (n=12) and the difference was significant ( $\chi^2 = 7.156$ ,  $df = 1$ ,  $P < 0.01$ ).  
30 When asked the question of whether 'most people in my culture smoke', there was a significant  
31 difference at  $p < 0.05$  level between male and female participants; more males believed that  
32  
33  
34  
35  
36  
37  
38  
39  
40  
41  
42  
43  
44  
45  
46  
47  
48  
49  
50  
51



1  
2  
3  
4  
5  
6  
7  
8  
9 smoking was a cultural habit in their community than females did. Similar findings were  
10 observed between Mandarin and Cantonese at  $p < 0.05$ ; more Mandarin said answered yes to the  
11 question. Younger smokers ( $< 35$  years of age) were more likely to mention that they '*did not*  
12 *mind smoking in front of non smokers*' compared to older smokers ( $\geq 35$  years of age). The mean  
13 difference was significant at  $p < 0.05$ . When asked whether they minded smoking in front of  
14 young children, similarly, younger smokers ( $< 35$  years of age) mentioned that they '*did not mind*  
15 *smoking in front of young children*' and the significant difference was at  $p = 0.005$ . When we  
16 asked whether '*second and third hand smoke was as harmful as first hand smoke*', again,  
17 relatively more younger smokers ( $< 35$  years of age) compared to older smokers said no when  
18 compared to older smokers ( $\geq 35$  years of age). The difference was significant at  $p < 0.05$ . We also  
19 asked whether participants '*had a smoking routine/pattern*' and found that people with high  
20 school or lower education mentioned they didn't have a routine/pattern compared to people with  
21 higher education level at  $p < 0.05$ .  
22  
23  
24  
25  
26  
27  
28  
29  
30  
31  
32  
33  
34

### 35 **Perceptions about smoking**

36  
37 We assessed smokers' perceived *enjoyable feeling* that they may have due to smoking by asking  
38 whether '*there is a different feeling when comparing times I smoke and don't smoke*' and found a  
39 statistically significant difference between male and female participants ( $\chi^2 = 4.237$ ;  $df = 1$ ,  
40  $P < 0.05$ ). Significantly more males ( $n = 47$ ) mentioned experiencing a different feeling when they  
41 smoked compared to not smoking than female smokers ( $n = 15$ ). In addition, younger smokers  
42 ( $< 35$  years of age) as well claimed to have a different feeling when comparing times smoking  
43 and not smoking ( $n = 46$ ) compared to older smokers ( $n = 16$ ), and the differences were statistically  
44 significant ( $\chi^2 = 3.889$ ,  $df = 1$ ,  $P < 0.05$ ). Likewise, more Mandarin smokers ( $n = 41$ ) than  
45  
46  
47  
48  
49  
50  
51  
52

1  
2  
3  
4  
5  
6  
7  
8  
9  
10  
11  
12  
13  
14  
15  
16  
17  
18  
19  
20  
21  
22  
23  
24  
25  
26  
27  
28  
29  
30  
31  
32  
33  
34  
35  
36  
37  
38  
39  
40  
41  
42  
43  
44  
45  
46  
47  
48  
49  
50  
51  
52  
53  
54  
55  
56  
57  
58  
59  
60

Cantonese smokers (n=20) reported having a different feeling when they smoke compared to when they were not smoking ( $\chi^2 = 5.188, df = 1, P < 0.05$ ). For this outcome there was no significant differences between highly educated (college/university and above) and lower educated (high school or lower).

Additionally, we assessed smokers' perceptions about *helpfulness* of smoking to alleviate their anxiety and stress. We noticed that 77% of female smokers, 69% of younger smokers (aged 34 years or younger), and 52% of older smokers (age 35 or older) smoked to reduce their sense of helpfulness. Male smokers perceived that smoking helped them to minimize the feeling of being bored (80%) and made them more connected to their group of friends (69%).

### **Feeling when smoking**

~~We asked if 'there is a different feeling when comparing times I smoke and don't smoke', and found a statistically significant difference between male and female participants ( $\chi^2 = 4.237, df = 1, P < 0.05$ ). Significantly more males mentioned experiencing a different feeling when they smoked compared to not smoking. In addition, younger smokers (<35 years of age) as well claimed to have a different feeling when comparing times smoking and not smoking. The differences between younger (<35 years of age) and older ( $\geq 35$  years of age) was statistically significant ( $\chi^2 = 3.889, df = 1, P < 0.05$ ). No significant differences in this regard were identified between Mandarin and Cantonese and highly educated (college/university and above) and lower educated (high school or lower).~~

### **Smoking cessation**

1  
2  
3  
4  
5  
6  
7  
8  
9 We aimed to identify willingness to quit smoking and *perceived barriers and facilitators* to  
10 cessation. The majority of participants, in particular young male and female smokers, mentioned  
11 their desire to quit and attempted to several times, before giving up and smoking again. A few  
12 people mentioned using medications or seeking professional advice to quit smoking but mainly  
13 relied on their own willpower to quit. Also, older participants indicated trying to quit due to  
14 health related issues such as heart disease or cancer. We were also interested to find out whether  
15 participants were under pressure by someone close to them to quit smoking. When asked ‘I was  
16 nagged by someone to quit smoking’, no statistically significant differences were identified in  
17 different gender, age, language, and education groups. However, when we asked whether they  
18 ‘would encourage others to quit’, more Mandarin speaking smokers answered yes to (n=45) than  
19 Cantonese speaking smokers (n=23) ( $\chi^2 = 5.172$ ,  $df = 1$ ,  $P < 0.05$ ). No significant differences were  
20 identified based on age, gender, and level of education. In addition, most participants (87%) said  
21 “No” to the question: “Would you encourage non-smokers to smoke?” Furthermore, we also  
22 asked whether living in a smoking restricted society like Canada would encourage smokers to  
23 quit or cut down on their smoking. More Mandarin speaking smokers (n=56, 60%) mentioned  
24 that ‘living in Canada influenced their smoking habits or desire to quit’, compared to Cantonese  
25 speaking smokers (n=30, 41%) ( $\chi^2 = 6.424$ ,  $df = 1$ ,  $P = 0.011$ ).

26  
27  
28  
29  
30  
31  
32  
33  
34  
35  
36  
37  
38  
39  
40  
41  
42  
43 More people with high school or lower education (n=34) agreed with the statement ‘I would  
44 benefit more from smoking than suffering from withdrawal symptoms due to quitting’, compared  
45 to the more educated smokers (n=12) ( $\chi^2 = 6.102$ ,  $df = 1$ ,  $P < 0.05$ ). When asked whether they  
46 ‘tried nicotine replacement therapy to quit smoking’, more Mandarin speaking smokers (n=32)  
47  
48  
49  
50

1  
2  
3  
4  
5  
6  
7  
8  
9  
10  
11  
12  
13  
14  
15  
16  
17  
18  
19  
20  
21  
22  
23  
24  
25  
26  
27  
28  
29  
30  
31  
32  
33  
34  
35  
36  
37  
38  
39  
40  
41  
42  
43  
44  
45  
46  
47  
48  
49  
50  
51  
52  
53  
54  
55  
56  
57  
58  
59  
60

mentioned that they had tried this aid to quit smoking compared to Cantonese speaking smokers (n=12 ( $\chi^2 = 7.275$ , df = 1,  $P = 0.007$ ).

In general, participants identified language and literacy issues as barriers to accessing smoking cessation information as well as lack of useful information in a social media format. For instance, older participants mentioned that they had limited exposure to public sources of information on cessation services that were developed in their native language. A small minority of these smokers had received advice and information about the health issues attributed to smoking from their physicians. Younger smokers mentioned the lack of disseminating smoking cessation messages through social media such as text messaging to promote quitting services in their native language.

Our synthesis of the interview data identified seven barriers to the participants' cessation which are summarized in Table 4.

**Table 4. Barriers to Smoking Cessation identified by the participants**

**Barriers**

- (a) the problems of managing their lives in a highly stressful environment
- (b) their isolation and the limited support systems in their community or work/school environments
- (c) the availability of smoking as a social-connection to their peers and limited resources for pleasure
- (d) perceived minimal health risks of smoking, (e) the commonality of smoking in their community

1  
2  
3  
4  
5  
6  
7  
8  
9 (e) the commonality of smoking in their community

10 (f) the scarce or non-existent information about how to stop smoking

11 (g) the belief that all they can quit on their own whenever they decide to

12  
13  
14  
15 *More Mandarin speaking smokers answered yes to whether they 'would encourage others to*  
16 *quit', than Cantonese speaking smokers and the difference was significant at  $p < 0.05$ . As well,*  
17 *more Mandarin speaking smokers also mentioned that 'living in Canada influenced their*  
18 *smoking habits or desire to quit', compared to Cantonese speaking smokers at  $p < 0.05$ .*  
19  
20 *In addition, more people with high school or lower education agreed with the statement 'I would*  
21 *benefit more from smoking than suffering from withdrawal symptoms due to quitting', compared*  
22 *to the higher educated at  $p < 0.05$ . When asked whether they 'tried nicotine replacement therapy*  
23 *to quit smoking', more Mandarin speaking smokers mentioned that they had tried this aid to quit*  
24 *smoking compared to Cantonese speaking smokers and the difference was statistically*  
25 *significant at  $p = 0.008$ .*

26  
27  
28  
29  
30  
31  
32  
33  
34  
35 *Many older participants mentioned that they had limited exposure to public sources of*  
36 *information on cessation services, developed in their native language. A few older smokers had*  
37 *received advice and information about the health issues attributed to smoking from their*  
38 *physicians. In general, participants indicated that they were not getting adequate support from*  
39 *their community, nor were aware of the resources that could have helped them quit, therefore*  
40 *lacked the decision making tools helping them to succeed their attempt.*

## 41 42 43 44 45 46 47 48 **DISCUSSION**

1  
2  
3  
4  
5  
6  
7  
8  
9  
10  
11  
12  
13  
14  
15  
16  
17  
18  
19  
20  
21  
22  
23  
24  
25  
26  
27  
28  
29  
30  
31  
32  
33  
34  
35  
36  
37  
38  
39  
40  
41  
42  
43  
44  
45  
46  
47  
48  
49  
50  
51  
52  
53  
54  
55  
56  
57  
58  
59  
60

The main ~~goalaim~~ of this study was to gain insight on the beliefs and perceptions into the psychosocial factors and the perceptions associated with smoking behaviours and smoking cessation among Chinese Cantonese and Mandarin speaking current smokers, taking into account culturally specific beliefs-knowledge and practices. The results have implications for the development of appropriate smoking cessation programs and educational interventions to prevent and control tobacco-related health issues among the target communities, for these immigrant groups. Such interventions may have policy implications in health promotion programs to prevent smoking onset among younger population groups in the immigrant communities.

Several participants in this study indicated their desire to quit and attempted to do so many times, many of wh~~om~~<sup>ich</sup> did it relying on their own willpower. Only-and a few, mainly among older smokers, tried to quit due to health related issues, ~~mainly among older smokers~~. They mentioned that a better communication with primary care providers and ease of access to culturally and linguistically appropriate smoking cessation resources would promote smoking cessation in their communities. Similar findings have been~~were~~ reported in studies done in other countries as well as among many immigrant communities in Canada who tried to quit smoking, as shown in different local studies.<sup>[254-286]</sup> In addition to elucidating these barriers to smoking cessation and despite continued smoking, participants showed being knowledgeable in health related and other negative aspects of smoking as on average, 70% of the participants indicated they were aware of the health consequences of smoking. This finding has been confirmed in other studies.<sup>[28]</sup> In our study, we found that higher education, better knowledge, and smoking regulations contributed to having a greater intent to quit smoking. For instance, we found that most

1  
2  
3  
4  
5  
6  
7  
8  
9 participants were not ignorant of the dangers of smoking, with the vast majority recognizing that  
10 smoking posed risks to their own health and the health of those around them. In addition to  
11 elucidating these barriers to smoking cessation and despite continued smoking, participants  
12 showed being knowledgeable in health related and other negative aspects of smoking. Firstly,  
13 most participants were not ignorant of the dangers of smoking, with the vast majority  
14 recognizing that smoking posed risks to their own health and the health of those around them.

15  
16  
17  
18  
19  
20 This knowledge is much higher than that of Chinese smokers who were previously surveyed in  
21  
22 China back to 2011, where only 36% of participants believed smoking can cause lung cancer and  
23  
24 only 4% were aware of the relationship of smoking to of whom associated cigarettes with heart  
25  
26 disease.[279] Secondly In addition, many of the smokers in our study already accepted limitations  
27  
28 on the use of cigarettes in Canada, and many mostly younger smokers, supported restrictions on  
29  
30 indoor smoking and also mentioned not smoking at home or where children are presented. This  
31  
32 could be attributed to the smoking restriction rules as well as the strong anti-smoking educational  
33  
34 campaigns in Canada. For example, since 2001, Health Canada has spent more than \$480 million  
35  
36 for a 5-year program to encourage tobacco cessation programs for all Canadians.[30] These  
37  
38 regulations might be important to reduce the risk of second-hand and third-hand smoking and  
39  
40 related health issues among young children and other non-smoker family members.  
41  
42 This practice is extremely important to reduce the risk of second hand and third hand smoking  
43  
44 and related health issues among young children and other non-smoker family members.

45  
46  
47 In terms of reasons to continue smoking, perceived advantages of smoking such as ‘smoking  
48  
49 does make me feel more comfortable’ and ‘smoking helps me to be stress-free when I have  
50  
51 problems’ appeared to be more important factors to promote smoking continuation among our

1  
2  
3  
4  
5  
6  
7  
8  
9  
10  
11  
12  
13  
14  
15  
16  
17  
18  
19  
20  
21  
22  
23  
24  
25  
26  
27  
28  
29  
30  
31  
32  
33  
34  
35  
36  
37  
38  
39  
40  
41  
42  
43  
44  
45  
46  
47  
48  
49  
50  
51  
52  
53  
54  
55  
56  
57  
58  
59  
60

study participants than perceived disadvantages around ‘health issues’ and ‘money’ which shown

to be strong motivators in quitting smoking in some studies. ~~Some studies found that smokers~~

Formatted: Font: Not Bold

~~may not be aware of the diseases caused by smoking and therefore, they may perceive~~

~~themselves less susceptible to the risks of smoking.[30-34] [28-30]~~ For instance, health

consequences and costs of smoking were not perceived as strong motivators to quit smoking

among young participants. ~~They reported the stimulating and anti-stress effects of smoking~~

Formatted: Font: Not Bold

~~(smoking may actually made them feel happier, more alert, etc), the feelings that may reinforce~~

~~their tobacco use and have associated these feelings with being around other smokers. In older~~

~~smokers, most of which showed low self-efficacy on being able to quit, the rationale for~~

~~continuing to smoke was different. For instance, for over 16% of smokers in this age group the~~

~~disadvantages of quitting were perceived to outweigh its advantages. The disadvantages of~~

~~quitting were perceived to outweigh its advantages were the main motives for continuing to~~

~~smoke among older smokers, most of which showed low self-efficacy on being able to quit.~~

Some reasons mentioned by older participants were: the addiction aspect of nicotine, being too

late to quit, and their body needed nicotine. In other studies among mainstream populations, self-

efficacy expectations and advantages of smoking cessation appeared to be the most important

associates of quitting smoking among older smokers.[35,36] Therefore, this issue should be

revisited in future studies with ethno-cultural communities. The results of this study suggest that

understanding health beliefs and perceptions around smoking and improving self-efficacy are

useful tools in promoting smoking cessation among smokers in Chinese immigrant communities.

## Limitations



1  
2  
3  
4  
5  
6  
7  
8  
9 Some limitations need to be considered. First, this study used a convenience sample, so it may  
10 not reflect the actual smoking prevalence and patterns among Mandarin and Cantonese  
11 immigrants in the GVA. We could not explore the effect of acculturation on smoking habit and  
12 pattern. There was no previous data on smoking pattern among Chinese immigrants in Canada,  
13 and attempting a community based assessment would have been inherently difficult for an  
14 exploratory study. Therefore the findings of this study cannot be generalized to larger Mandarin  
15 and Cantonese speaking communities residing in the GVA. The ~~goal~~~~main aim~~ was to explore the  
16 links to smoking cessation among Mandarin and Cantonese populations in order to gain insight  
17 into the need to adapt smoking cessation programs in these groups. In future research, a  
18 longitudinal design in which our results can be tested is recommended. A second limitation is the  
19 fact that all responses were by self-report and validation of smoking behaviour or reasons to quit  
20 or continue smoking was not possible with a cross-sectional design. A third limitation is the  
21 absence of a native mainstream (English-speaking) reference group, due to lack of resources.  
22 This could be a problem for interpreting the additional ‘culturally specific’ beliefs, because these  
23 were not elicited from mainstream population group. Nevertheless, to assess whether the beliefs  
24 we identified in this study are really ‘culturally specific’, a cohort study with all significant  
25 beliefs for main ethnic groups in the GVA, including mainstream population, might be useful.  
26  
27  
28  
29  
30  
31  
32  
33  
34  
35  
36  
37  
38  
39  
40  
41  
42

## 43 CONCLUSION

44 The results of our study suggest that an effective anti-smoking campaign in the Chinese  
45 community should go beyond traditional English language efforts, utilize Chinese resources, and  
46 build upon existing cultural attitudes (such as the belief that smoking is inappropriate for young  
47 people) and knowledge (such as health risks) about smoking. Particular attention should be paid  
48  
49  
50  
51

---

1  
2  
3  
4  
5  
6  
7  
8  
9 to differences between female and male smokers, and between younger and older smokers  
10 related to their knowledge, beliefs and attitudes about smoking, and perceived barriers and  
11 facilitators to smoking cessation. -We also identified different beliefs and perceptions about the  
12 harms and benefits of smoking, based on language, age, and gender group. The findings indicate  
13 the importance of addressing risk perceptions about the immediate and long-term consequences  
14 of smoking. Therefore, future interventions can prove the applicability of a risk perception model  
15 on smoking cessation among Mandarin and Cantonese speaking smokers. Despite finding  
16 significant differences between the genders, educational level, ethnicity and age groups in our  
17 study, we believe a larger sample size is needed to address this issue. The findings build a  
18 window of opportunity to promote tailored cessation interventions incorporating cultural beliefs,  
19 perceptions, and practices for Chinese immigrant communities.  
20  
21 an important issue that our sample size was not large enough to address. Also, future  
22 interventions can prove the applicability of a risk perception model on smoking cessation among  
23 Mandarin and Cantonese speaking smokers. Community key informants and healthcare  
24 providers are important allies in developing culturally and linguistically appropriate smoking  
25 cessation promotional programs and reinforcing to their clients the importance of smoking  
26 prevention and cessation. Our study provides evidence that attitudes and beliefs of cigarette  
27 smoking differ between language, age, and gender groups. The differences with regard to  
28 tobacco smoking appear to be related to attitudes or knowledge. The findings build a window of  
29 opportunity to promote tailored cessation interventions incorporating cultural beliefs,  
30 perceptions, and practices for Chinese immigrant communities.  
31  
32  
33  
34  
35  
36  
37  
38  
39  
40  
41  
42  
43  
44  
45  
46  
47  
48

## 50 Practical Implications

---

1  
2  
3  
4  
5  
6  
7  
8  
9 Our study identified the health beliefs and perceptions about smoking and its cessation among  
10 Mandarin and Cantonese immigrants that could be considered by healthcare decision makers to  
11 develop health promotion programs preventing smoking onset among younger population groups  
12 in Chinese community. Interventions should take account of the specific profiles that Mandarin  
13 and Cantonese immigrants in terms of knowledge, attitudes, beliefs and perceptions on their  
14 smoking habits and patterns. Given the results of this study, we plan to conduct further research  
15 to assess the applicability of a risk perception model to the smoking behavior of routine smokers  
16 in the target immigrant communities. The model has been shown effective in terms of modifying  
17 risk-taking behaviors, promoting positive perceptions, and improving self-efficacy that have  
18 been applied for changing smoking habits/behavior .[37-39]

19  
20  
21  
22  
23  
24  
25  
26  
27  
28 Despite the above mentioned limitations, the study has great significance in attracting the  
29 attention to the health disparities that Chinese immigrants in the GVA that have been in terms of  
30 higher prevalence of tobacco use in their homeland and diminished access to culturally and  
31 linguistically appropriate cessation aids. Interventions should take into consideration the specific  
32 profiles that Mandarin and Cantonese immigrants have in terms of the knowledge, attitudes, and  
33 beliefs on their smoking habits and patterns. Given the results of this study, we can conduct  
34 further research to assess the applicability of a risk perception model to the smoking behavior of  
35 routine smokers in the target immigrant communities. The model has been shown effective in  
36 terms of modifying risk taking behaviours, promoting positive perceptions, and improving self-  
37 efficacy that have been applied for changing smoking habits/behaviour among participants in  
38 different studies.[33-35]

1  
2  
3  
4  
5  
6  
7  
8  
9  
10  
11  
12  
13  
14  
15  
16  
17  
18  
19  
20  
21  
22  
23  
24  
25  
26  
27  
28  
29  
30  
31  
32  
33  
34  
35  
36  
37  
38  
39  
40  
41  
42  
43  
44  
45  
46  
47  
48  
49  
50  
51  
52  
53  
54  
55  
56  
57  
58  
59  
60**ACKNOWLEDGEMENTS**

We would like to thank the community members, facilitators, ethno-cultural serving agencies (SUCCESS), and key-informants from the Mandarin and Cantonese communities in the Greater Vancouver Area who helped us since the initial steps of this research.

**FUNDING**

This project was funded by a community grant from The Vancouver Foundation, Vancouver, Canada.

**COMPETING INTERESTS**

We declare that there is no conflict of interest in terms of ownership of shares, consultancy, speaker's honoraria or research grants from commercial companies or professional or governmental organizations with an interest in the topic of the paper (the ICMJE form for Disclosure of Potential Conflicts of Interest from the Corresponding Author is also attached to this submission).

**CONTRIBUTOR STATEMENT**

JMF and IP planned the conception and study design. IP prepared the proposal draft to the funding agency and applied for the ethics approval. JS coordinated the study, recruited participants, and facilitated the community involvement. IP analyzed and interpreted the study data. IP and JS drafted the manuscript for important intellectual content.

**DATA SHARING STATEMENT**

No additional data available.

## REFERENCE LIST

1. Centers for Disease Control and Prevention. Tobacco Use. 2012. Available from: <http://www.cdc.gov/chronicdisease/resources/publications/aag/osh.htm> Accessed on June 20, 2014.
2. World Health Organization. Tobacco Free Initiative (TFI). 2014. Available from: [http://www.who.int/tobacco/health\\_priority/en/](http://www.who.int/tobacco/health_priority/en/) Accessed on June 18, 2014.
3. Haddad L, El-Shahawy O, Shishani K, et al. Cigarette use attitudes and effects of acculturation among Arab immigrants in USA: A preliminary study. *Health* 2012;4(10):785-793.
4. Robles GI, Singh-Franco D, & Ghin HL. A review of the efficacy of smoking-cessation pharmacotherapies in nonwhite populations. *Clin Ther* 2008;30(5):800-12.
5. Okuyemi K, Nollen N, & Ahluwalia J. Interventions to Facilitate Smoking Cessation. *Am Fam Physician* 2006;74(2):262-271.
6. Health Canada. Canadian Tobacco Use Monitoring Survey (CTUMS) 2010. 2010. Available at [http://www.hc-sc.gc.ca/hc-ps/tobac-tabac/research-recherche/stat/ctums-esutc\\_2010\\_graph-eng.php](http://www.hc-sc.gc.ca/hc-ps/tobac-tabac/research-recherche/stat/ctums-esutc_2010_graph-eng.php) Accessed on July 2, 2014.
7. Yan J, Xiao S, Ouyang D, et al. Smoking behavior, knowledge, attitudes and practice among health care providers in Changsha city, China. *Nicotine Tob Res* 2008; 10: 737-744.
8. Wu D, Ma GX, Zhou K, et al. The effect of a culturally tailored smoking cessation for Chinese American smokers. *Nicotine Tob Res* 2009;11(12):1448-1457.
9. Chen W. *Susceptibility to Smoking among Chinese-Canadian Non-smoking Adolescents*. Doctoral Dissertation, University of British Columbia. 2008. Available at

- 1  
2  
3  
4  
5  
6  
7  
8  
9 [https://circle.ubc.ca/bitstream/handle/2429/942/ubc\\_2008\\_fall\\_chen\\_weihong.pdf?sequence=1](https://circle.ubc.ca/bitstream/handle/2429/942/ubc_2008_fall_chen_weihong.pdf?sequence=1) Accessed on July 2, 2014.
- 10  
11  
12  
13 **10.** Yang G, Ma J, Liu N, et al. Smoking and passive smoking in Chinese - 2002.  
14 *Zhonghua Liu Xing Bing Xue Za Zhi* 2005;26:77-83.
- 15  
16  
17 **11.** Ksal H, Sayg A, Sariman N, et al. Evaluation of Clinical and Functional Parameters in  
18 Female Subjects With Biomass Smoke Exposure. *Respir Care* 2013;58(3):424-430.
- 19  
20  
21 **12.** Statistics Canada. Some facts about the demographic and ethnocultural composition of  
22 the population. 2008. Available at [http://www.statcan.gc.ca/pub/91-003-](http://www.statcan.gc.ca/pub/91-003-x/2007001/4129904-eng.htm#2)  
23 [x/2007001/4129904-eng.htm#2](http://www.statcan.gc.ca/pub/91-003-x/2007001/4129904-eng.htm#2) Accessed on July 2, 2014.
- 24  
25  
26 **13.** BC Statistics. Population Estimates - Total Populations. 2010. Available at:  
27 <http://www.bcstats.gov.bc.ca/data/pop/pop/estspop.asp#totpop> Accessed on July 2, 2014.
- 28  
29  
30 **14.** Zeng XX, Chiu CH, Sun J, et al. A Phone-Counseling Smoking-Cessation Intervention  
31 for Male Chinese Restaurant Workers. *J Commun Health* 2010(3):1-12.
- 32  
33  
34 **15.** Gallup World. Three in 10 Chinese Adults Smoke. 2012. Available at:  
35 <http://www.gallup.com/poll/152546/three-chinese-adults-smoke.aspx> Accessed on July 2,  
36 2014.
- 37  
38  
39 **16.** World Health Organization. Tobacco in China. Western Pacific Region. 2014. Available  
40 at: <http://www.wpro.who.int/china/mediacentre/factsheets/tobacco/en/> Accessed on June  
41 20, 2014.
- 42  
43  
44  
45 **17.** Poureslami I, Doyle-Waters MMR, Nimmon L, et al. Hearing the community voice:  
46 methodological issues in developing asthma self-management educational materials for  
47 immigrant communities. In Agyemang C, Airhihenbuwa CO, de-Graft Aikins A (eds.),  
48  
49  
50

1  
2  
3  
4  
5  
6  
7  
8  
9  
10  
11  
12  
13  
14  
15  
16  
17  
18  
19  
20  
21  
22  
23  
24  
25  
26  
27  
28  
29  
30  
31  
32  
33  
34  
35  
36  
37  
38  
39  
40  
41  
42  
43  
44  
45  
46  
47  
48  
49  
50  
51  
52  
53  
54  
55  
56  
57  
58  
59  
60

*Ethnicity: Theories, International Perspectives and Challenges*. Hauppauge NY: Nova Publishers 2014:125-156.

**18.** Faridi Z, Grunbaum JA, Gray BS, et al. 2007. Community-based participatory research: necessary next steps. *Prev Chronic Dis*. Available at: [http://www.cdc.gov/pcd/issues/2007/jul/06\\_0182.htm](http://www.cdc.gov/pcd/issues/2007/jul/06_0182.htm) Accessed on June 21, 2014.

**19.** Israel BA, Schulz AJ, Parker EA, et al. Review of community-based research: assessing partnership approaches to improve public. *Annu.Rev.Public Health*. 1998;19:173–202.

**20.** Poureslami I, Shum J, Cheng N, et al. Does Culture or Illness Change a Smoker's Perspective on Cessation? *Am J Health Behav* 2014;38(5):33-39.

**21.** Poureslami I, Shum J, & FitzGerald JM. Differences in attitudes and beliefs about smoking among smoker and ex-smoker COPD patients. *J Health Care Poor* 2014 (Under review).

**22.** Poureslami I, Rootman I, Doyle-Water MMR, et al. Health literacy, language, and ethnicity-related factors in newcomer asthma patients to Canada: a qualitative study. *J Immigr Minor Health*.2011;13(2):315-322.

**23.** Klassen AF, Gulati S, Watt L, et al. Immigrant to Canada, newcomer to childhood cancer: a qualitative study of challenges faced by immigrant parents. *Psycho-oncol* 2012;21(5):558-562.

**24.** Scarinci IC, Silveira AF, Figueiredo dos Santos D, Beech BM. Sociocultural factors associated with cigarette smoking among women in Brazilian worksites: a qualitative study. *Health Promot. Int.* (2007) 22 (2): 146-154.

- 1  
2  
3  
4  
5  
6  
7  
8  
9 25. Dawson AP, Cargo M, Stewart H, et al. Aboriginal Health Workers experience multilevel  
10 barriers to quitting smoking: a qualitative study. *Int J Equity Health* 2012;11: 27.  
11  
12  
13  
14 26. North American Quitline Consortium (NAQC). The Use of Quitlines among Priority  
15 Populations in the U.S.: Lessons from the Scientific Evidence. 2011. Available at:  
16 [http://c.ymcdn.com/sites/www\\_naquitline.org/resource/resmgr/Issue\\_Papers/IssuePaperT](http://c.ymcdn.com/sites/www_naquitline.org/resource/resmgr/Issue_Papers/IssuePaperTheUseofQuitlinesA.pdf)  
17 [heUseofQuitlinesA.pdf](http://c.ymcdn.com/sites/www_naquitline.org/resource/resmgr/Issue_Papers/IssuePaperTheUseofQuitlinesA.pdf) Accessed on July 15, 2014.  
18  
19  
20  
21  
22  
23  
24 27. Maryland Department of Health and Mental Hygiene. Exploring cultural, psychosocial,  
25 and environmental factors influencing tobacco use among Asian Americans, Hispanics,  
26 African Americans and American Indians in Maryland. Cigarette Restitution Fund's  
27 Tobacco Use Prevention and Cessation Program. 2008. Available at:  
28 [https://sph.umd.edu/epib/cultural\\_competency/Exploring%20cultural,%20psychosocial,](https://sph.umd.edu/epib/cultural_competency/Exploring%20cultural,%20psychosocial,%20and%20environmental%20factors%20influencing%20tobacco%20use%20among%20Asian%20Americans,%20Hispanics,%20African%20Americans%20and%20American%20Indians%20in%20Maryland.pdf)  
29 [%20and%20environmental%20factors%20influencing%20tobacco%20use%20among%20](https://sph.umd.edu/epib/cultural_competency/Exploring%20cultural,%20psychosocial,%20and%20environmental%20factors%20influencing%20tobacco%20use%20among%20Asian%20Americans,%20Hispanics,%20African%20Americans%20and%20American%20Indians%20in%20Maryland.pdf)  
30 [0Asian%20Americans,%20Hispanics,%20African%20Americans%20and%20American](https://sph.umd.edu/epib/cultural_competency/Exploring%20cultural,%20psychosocial,%20and%20environmental%20factors%20influencing%20tobacco%20use%20among%20Asian%20Americans,%20Hispanics,%20African%20Americans%20and%20American%20Indians%20in%20Maryland.pdf)  
31 [%20Indians%20in%20Maryland.pdf](https://sph.umd.edu/epib/cultural_competency/Exploring%20cultural,%20psychosocial,%20and%20environmental%20factors%20influencing%20tobacco%20use%20among%20Asian%20Americans,%20Hispanics,%20African%20Americans%20and%20American%20Indians%20in%20Maryland.pdf) Accessed on July 15, 2014.  
32  
33  
34  
35  
36  
37  
38  
39  
40  
41 28. Binnal A, Rajesh G, Ahmed J, et al. Insights into Smoking and its Cessation among  
42 Current Smokers in India. *Asian Pacific J Cancer Prev.* 2013; 14 (5): 2811-2818.  
43  
44  
45  
46  
47  
48  
49  
50  
51



- 1  
2  
3  
4  
5  
6  
7  
8  
9 **29.** [Yang J, Hammond D, Driezen P, et al. Health knowledge and perception of risks among](#)  
10 [Chinese smokers and non-smokers: Findings from the Wave 1 ITC China Survey.](#) *Tob*  
11 [Control](#) 2010;19(Supplement 2):i18-i23.
- 12  
13  
14  
15  
16 **30.** [Siahpush M, McNeill A, Hammond D, Fong GT. Socioeconomic and country variations](#)  
17 [in knowledge of health risks of tobacco smoking and toxic constituents of smoke: results](#)  
18 [from the 2002 International Tobacco Control \(ITC\) Four Country Survey.](#) *Tobacco*  
19 [Control](#) 2006; 15(Suppl III):iii65–iii70. doi: 10.1136/tc.2005.013276.
- 20  
21  
22  
23  
24  
25  
26 **31.** [Oncken C, McKee S, Krishnan-Sarin S, et al. Knowledge and perceived risk of smoking-](#)  
27 [related conditions: a survey of cigarette smokers.](#) *Preventive Medicine.* 2005; 40: 779–  
28 [784.](#)
- 29  
30  
31  
32  
33  
34 **32.** [Roddy E, Antoniak M, Britton J, et al. Barriers and motivators to gaining access to](#)  
35 [smoking cessation services amongst deprived smokers – a qualitative study.](#) *BMC Health*  
36 [Services Research](#) 2006;6:147-154.
- 37  
38  
39  
40  
41 **33.** [Litmus research organization. Quitting Motivations and Barriers Qualitative Research.](#)  
42 [The Quit Group. 2005. Available at:](#)  
43 <http://www.quit.org.nz/file/research/FINAL%20Litmus%20report->  
44 [Quitting%20Motivations%20and%20Barriers.pdf](#) Accessed on July 15, 2014.
- 45  
46  
47  
48  
49  
50  
51

- 1  
2  
3  
4  
5  
6  
7  
8  
9 34. Richardson K. Smoking, Low Income and Health Inequalities: Thematic Discussion  
10 Document. Action on Smoking and Health and the Health Development Agency. 2001.  
11 Available at: [http://www.ash.org.uk/files/documents/ASH\\_86.pdf](http://www.ash.org.uk/files/documents/ASH_86.pdf) Accessed on July 15,  
12 2014.
- 13  
14  
15  
16  
17  
18 35. Gwaltney CJ, Metrik J, Kahler CW, Shiffman S. Self-Efficacy and Smoking Cessation: A  
19 Meta-Analysis. *Psychol Addict Behav* 2009;23(1):1-20.
- 20  
21  
22  
23  
24 36. Dijkstra A, & De Vries H. Self-efficacy expectations with regard to different tasks in  
25 smoking cessation. *Psychol Health* 2000;15(4):501-511.
- 26  
27  
28  
29  
30 37. Song AV, Morrell HE, Cornell JL, et al. Perceptions of Smoking-Related Risks and  
31 Benefits as Predictors of Adolescent Smoking Initiation. *Am J Public Health*  
32 2009;99(3):487-492.
- 33  
34  
35  
36  
37 38. Aryal UR, Petzold M, & Krettek A. Perceived risks and benefits of cigarette smoking  
38 among Nepalese adolescents: a population-based cross-sectional study. *BMC Public*  
39 *Health* 2013;13:187-196.
- 40  
41  
42  
43  
44 Harris JK, Karamehic-Muratovic A, Herbers SH, et al. Perceptions of Personal Risk About  
45 Smoking and Health Among Bosnian Refugees Living in The United States. *J Immigrant*  
46 *Minority Health* 2012;14(3):413-919.

#### REFERENCE LIST

Centers for Disease Control and Prevention. Tobacco Use. 2012. Available from:  
<http://www.cdc.gov/chronicdisease/resources/publications/aag/osh.htm> Accessed on June 20,  
2014.

World Health Organization. Tobacco Free Initiative (TFI). 2014. Available from:  
[http://www.who.int/tobacco/health\\_priority/en/](http://www.who.int/tobacco/health_priority/en/) Accessed on June 18, 2014.

Haddad L, El-Shahawy O, Shishani K, et al. Cigarette use attitudes and effects of acculturation  
among Arab immigrants in USA: A preliminary study. *Health* 2012;4(10):785-793.

Robles GI, Singh-Franco D, & Ghin HL. A review of the efficacy of smoking cessation  
pharmacotherapies in nonwhite populations. *Clin Ther* 2008;30(5):800-12.

Okuyemi K, Nollen N, & Ahluwalia J. Interventions to Facilitate Smoking Cessation. *Am Fam  
Physician* 2006;74(2):262-271.

Health Canada. Canadian Tobacco Use Monitoring Survey (CTUMS) 2010. 2010. Available at  
[http://www.hc-sc.gc.ca/hc-ps/tobac-tabac/research-recherche/stat/ctums-esute\\_2010\\_graph-  
eng.php](http://www.hc-sc.gc.ca/hc-ps/tobac-tabac/research-recherche/stat/ctums-esute_2010_graph-eng.php) Accessed on July 2, 2014.

Yan J, Xiao S, Ouyang D, et al. Smoking behavior, knowledge, attitudes and practice among  
health care providers in Changsha city, China. *Nicotine Tob Res*  
2008;10:737-744.

Wu D, Ma GX, Zhou K, et al. The effect of a culturally tailored smoking cessation for Chinese  
American smokers. *Nicotine Tob Res* 2009;11(12):1448-1457.

Chen W. *Susceptibility to Smoking Among Chinese-Canadian Non-smoking Adolescents*.  
Doctoral Dissertation, University of British Columbia. 2008. Available at  
[https://circle.ubc.ca/bitstream/handle/2429/942/ubc\\_2008\\_fall\\_chen\\_weihong.pdf?sequence=1](https://circle.ubc.ca/bitstream/handle/2429/942/ubc_2008_fall_chen_weihong.pdf?sequence=1)  
Accessed on July 2, 2014.

1  
2  
3  
4  
5  
6  
7  
8  
9 Yang G, Ma J, Liu N, et al. Smoking and passive smoking in Chinese—2002.  
10 *Zhonghua Liu Xing Bing Xue Za Zhi* 2005;26:77-83.  
11  
12 Ksal H, Sayg A, Sarman N, et al. Evaluation of Clinical and Functional Parameters in Female  
13 Subjects With Biomass Smoke Exposure. *Respir Care* 2013;58(3):424-430.  
14  
15 Statistics Canada. Some facts about the demographic and ethnocultural composition of the  
16 population. 2008. Available at [http://www.statean.gc.ca/pub/91-003-x/2007001/4129904-](http://www.statean.gc.ca/pub/91-003-x/2007001/4129904-eng.htm#2)  
17 [eng.htm#2](http://www.statean.gc.ca/pub/91-003-x/2007001/4129904-eng.htm#2) Accessed on July 2, 2014.  
18  
19 BC Statistics. Population Estimates—Total Populations. 2010. Available at:  
20 <http://www.bestats.gov.bc.ca/data/pop/pop/estspop.asp#totpop> Accessed on July 2, 2014.  
21  
22 Zeng XX, Chiu CH, Sun J, et al. A Phone Counseling Smoking Cessation Intervention for Male  
23 Chinese Restaurant Workers. *J Commun Health* 2010(3):1-12.  
24  
25 Gallup World. Three in 10 Chinese Adults Smoke. 2012. Available at:  
26 <http://www.gallup.com/poll/152546/three-chinese-adults-smoke.aspx> Accessed on July 2, 2014.  
27  
28 World Health Organization. Tobacco in China. Western Pacific Region. 2014. Available at:  
29 <http://www.wpro.who.int/china/mediacentre/factsheets/tobacco/en/> Accessed on June 20, 2014.  
30  
31 Poureslami I, Doyle Waters MMR, Nimmon L, et al. Hearing the community voice:  
32 methodological issues in developing asthma self-management educational materials for  
33 immigrant communities. In Agyemang C, Airhihenbuwa CO, de Graft Aikins A (eds.);  
34 *Ethnicity: Theories, International Perspectives and Challenges*. Hauppauge NY: Nova Publishers  
35 2014:125-156.  
36  
37 Faridi Z, Grunbaum JA, Gray BS, et al. 2007. Community-based participatory research:  
38 necessary next steps. *Prev Chronic Dis*. Available at: <http://www.cdc.gov/ped/>  
39 [issues/2007/jul/06\\_0182.htm](http://www.cdc.gov/ped/issues/2007/jul/06_0182.htm) Accessed on June 21, 2014.  
40  
41  
42  
43  
44  
45  
46  
47  
48  
49  
50  
51

1  
2  
3  
4  
5  
6  
7  
8  
9 Israel BA, Schulz AJ, Parker EA, et al. Review of community based research: assessing  
10 partnership approaches to improve public. *Annu.Rev.Public Health*.1998;19:173-202.  
11  
12 Poursalami I, Shum J, Cheng N, et al. Does Culture or Illness Change a Smoker's Perspective on  
13 Cessation? *Am J Health Behav* 2014;38(5):33-39.  
14  
15  
16 Poursalami I, Shum J, & FitzGerald JM. Differences in attitudes and beliefs about smoking  
17 among smoker and ex-smoker COPD patients. *J Health Care Poor* 2014 (Under review).  
18  
19 Poursalami I, Rootman I, Doyle-Water MMR, et al. Health literacy, language, and ethnicity-  
20 related factors in newcomer asthma patients to Canada: a qualitative study. *J Immigr Minor*  
21 *Health*.2011;13(2):315-322.  
22  
23  
24  
25 Klassen AF, Gulati S, Watt L, et al. Immigrant to Canada, newcomer to childhood cancer: a  
26 qualitative study of challenges faced by immigrant parents. *Psycho-oncol* 2012;21(5):558-562.  
27  
28 Dawson AP, Cargo M, Stewart H, et al. Aboriginal Health Workers experience multilevel  
29 barriers to quitting smoking: a qualitative study. *Int J Equity Health* 2012;11: 27.  
30  
31  
32 North American Quitline Consortium (NAQC). The Use of Quitlines among Priority  
33 Populations in the U.S.: Lessons from the Scientific Evidence. 2011. Available at:  
34 [http://e.ymedn.com/sites/www.naquitline.org/resource/resmgr/Issue\\_Papers/IssuePaperTheUseof](http://e.ymedn.com/sites/www.naquitline.org/resource/resmgr/Issue_Papers/IssuePaperTheUseof)  
35 [QuitlinesA.pdf](http://e.ymedn.com/sites/www.naquitline.org/resource/resmgr/Issue_Papers/IssuePaperTheUseof) Accessed on July 15, 2014.  
36  
37  
38 Maryland Department of Health and Mental Hygiene. Exploring cultural, psychosocial, and  
39 environmental factors influencing tobacco use among Asian Americans, Hispanics, African  
40 Americans and American Indians in Maryland. Cigarette Restitution Fund's Tobacco Use  
41 Prevention and Cessation Program. 2008. Available at:  
42 [https://sph.umd.edu/epib/cultural\\_competency/Exploring%20cultural,%20psychosocial,%20and](https://sph.umd.edu/epib/cultural_competency/Exploring%20cultural,%20psychosocial,%20and)  
43 [%20environmental%20factors%20influencing%20tobacco%20use%20among%20Asian%20Am](https://sph.umd.edu/epib/cultural_competency/Exploring%20cultural,%20psychosocial,%20and)  
44  
45  
46  
47  
48  
49  
50  
51

1  
2  
3  
4  
5  
6  
7  
8  
9  
10  
11  
12  
13  
14  
15  
16  
17  
18  
19  
20  
21  
22  
23  
24  
25  
26  
27  
28  
29  
30  
31  
32  
33  
34  
35  
36  
37  
38  
39  
40  
41  
42  
43  
44  
45  
46  
47  
48  
49  
50  
51  
52  
53  
54  
55  
56  
57  
58  
59  
60

ericans,%20Hispanics,%20African%20Americans%20and%20American%20Indians%20in%20  
Maryland.pdf Accessed on July 15, 2014.

Yang J, Hammond D, Driezen P, et al. Health knowledge and perception of risks among Chinese  
smokers and non-smokers: Findings from the Wave 1 ITC China Survey. *Tob Control*  
2010;19(Supplement 2):i18-i23.

Roddy E, Antoniak M, Britton J, et al. Barriers and motivators to gaining access to smoking  
cessation services amongst deprived smokers—a qualitative study. *BMC Health Services*  
*Research* 2006;6:147-154.

Litmus research organization. Quitting Motivations and Barriers Qualitative Research. The Quit  
Group. 2005. Available at: [http://www.quit.org.nz/file/research/FINAL%20Litmus%20report-  
Quitting%20Motivations%20and%20Barriers.pdf](http://www.quit.org.nz/file/research/FINAL%20Litmus%20report-Quitting%20Motivations%20and%20Barriers.pdf) Accessed on July 15, 2014.

Richardson K. Smoking, Low Income and Health Inequalities: Thematic Discussion Document.  
Action on Smoking and Health and the Health Development Agency. 2001. Available at:  
[http://www.ash.org.uk/files/documents/ASH\\_86.pdf](http://www.ash.org.uk/files/documents/ASH_86.pdf) Accessed on July 15, 2014.

Gwaltney CJ, Metrik J, Kahler CW, Shiffman S. Self-Efficacy and Smoking Cessation: A Meta-  
Analysis. *Psychol Addict Behav* 2009;23(1):1-20.

Dijkstra A, & De Vries H. Self efficacy expectations with regard to different tasks in smoking  
cessation. *Psychol Health* 2000;15(4):501-511.

Song AV, Morrell HE, Cornell JL, et al. Perceptions of Smoking-Related Risks and Benefits as  
Predictors of Adolescent Smoking Initiation. *Am J Public Health* 2009;99(3):487-492.

Aryal UR, Petzold M, & Krettek A. Perceived risks and benefits of cigarette smoking among  
Nepalese adolescents: a population-based cross-sectional study. *BMC Public Health*  
2013;13:187-196.

1  
2  
3  
4  
5  
6  
7  
8  
9 | [Harris JK, Karamelic Muratovic A, Herbers SH, et al. Perceptions of Personal Risk About](#)  
10 | [Smoking and Health Among Bosnian Refugees Living in The United States. \*J Immigrant\*](#)  
11 | [Minority Health 2012;14\(3\):413-919.](#)  
12  
13  
14  
15  
16  
17  
18  
19  
20  
21  
22  
23  
24  
25  
26  
27  
28  
29  
30  
31  
32  
33  
34  
35  
36  
37  
38  
39  
40  
41  
42  
43  
44  
45  
46  
47  
48  
49  
50  
51



**The effect of a multi-dimensional smoking cessation intervention on Mandarin and Cantonese-speaking immigrants residing in the Greater Vancouver Area: A community-based program**

Please respond to the following questions:

**A. All about you**

**1. What is your gender?**

- Male  Female

**2. What is your age?**

- 21-25 years old  
 26-35 years old  
 36-45 years old  
 46-55 years old  
 56 years old and above

**3. Which language(s) do you speak most with your friends, family, or co-workers?**

- Mandarin  
 Cantonese  
 English  
 Others, please specify \_\_\_\_\_

**4. What is your marital status?**

- Single, never married  
 Married  
 Living under common-law  
 Divorced  
 Widowed/Living alone

**5. What is your highest level of education?**

- Never attended school  
 Elementary school  
 High school  
 University degree  
 University degree and above  
 Others, please specify \_\_\_\_\_

**6. What is your current employment status?**

- I am a student  
 I am employed  
 I am self-employed  
 I am unemployed  
 I am retired





## B. Smoking onset questions

### 1. At what age did you start smoking?

- Under 18 years old  
 19-25 years old  
 26-39 years old  
 40 years old and older

### 2. Why did you start smoking? (Choose all that are applicable to you and explain)

- Social factors, please specify \_\_\_\_\_

- Emotional factors, please specify \_\_\_\_\_

- Environmental factors, please specify \_\_\_\_\_

- Others, please specify \_\_\_\_\_

### 3. At the time you started smoking, did somebody in your social network smoke?

(Choose all that are applicable to you)

- None or Not applicable  
 Family, who, please specify \_\_\_\_\_  
 Colleagues, from where, please specify \_\_\_\_\_  
 Friends  
 Classmates, at what age, please specify \_\_\_\_\_  
 Others, please specify \_\_\_\_\_

### 4. At the time you started smoking, did somebody tell you about the health problems smoking a cigarette can cause?

(Choose all that are applicable to you)

- None or Not applicable  
 Family, who, please specify \_\_\_\_\_  
 Colleagues  
 Friends  
 Classmates, at what age, please specify \_\_\_\_\_  
 Media  
 Health professionals  
 Others, please specify \_\_\_\_\_

### 5. At the time you started smoking, did you know the side effects of smoking?

- Yes       No

**If yes, which one(s) did you know?**

- Makes teeth yellow  
 Causes wrinkles



- Makes smokers smell bad
- Causes more phlegm
- Shortness of breath
- Causes bad breath
- Cough
- Increased risk of lung cancer
- Greater risk of heart disease
- Others, please specify \_\_\_\_\_

**6. Why did you become a regular smoker?**

**(Choose all that are applicable to you)**

- I have never been a regular smoker (**After choosing, please skip to question 7**)
- I craved cigarettes if I didn't smoke regularly
- I was around smokers a lot of time
- I found smoking pleasurable
- I enjoy the taste
- Smoking relaxed me
- Smoking helped me focus and concentrate better
- Smoking helped me feel less stressed
- I smoke to fit in with other people
- I like the image of a smoker
- Smoking helped me control my weight
- Since others in my family smoked, it was easy to see myself as a smoker too
- Others, please specify \_\_\_\_\_

**7. If you are not a regular smoker, why didn't you become a regular smoker?**

**(Choose all that are applicable to you)**

- I did not enjoy smoking
- Smoking cigarettes made me feel sick
- I did not like the taste and/ or the smell of cigarettes
- I did not want to become addicted to cigarettes
- I was concerned about the effects of smoking on my health
- I was concerned about the effects of smoking on the health of the people around me
- I don't hang out with people who are smokers that often
- I was encouraged to stop smoking by my friends
- I was encouraged to stop smoking by an adult such as my parents/ guardians, a teacher, or a doctor
- I did not like the image of being a smoker
- It was hard for me to obtain cigarettes
- Cigarettes are expensive
- I had trouble finding places to smoke
- Since I grew up in a non-smoking family, I just could not see myself as a smoker
- I don't want people to know that I smoke
- Others, please specify \_\_\_\_\_



**C. Which characteristic best describes you as a smoker?**

**1. How much do you smoke now per day?**

# Packs \_\_\_\_\_ or # Cigarettes \_\_\_\_\_

**2. How much do you spend weekly on buying cigarettes?**

- Under \$25/week  
 \$25-50/week  
 \$50-75/week  
 \$75-100/week  
 \$101+/week

**3. I have a smoking routine/pattern.**

- True     False     Not sure

**4. I smoke**

**(Choose all that are applicable to you)**

- When I am bored  
 When I am upset  
 When I am having a break  
 When I am partying  
 When I am driving  
 When I am under stress  
 When I am with friends  
 When I am alone  
 When I am in a social gathering  
 Mostly at home  
 At work or at school  
 When I have alcohol  
 First thing when I wake up  
 Mostly in the morning  
 Mostly in the afternoon  
 At night before I head to bed  
 After every meal  
 After every tea or coffee  
 During every phone conversation  
 Before I go to the washroom  
 Before I head to work on an assignment/task  
 After I finish an assignment/task  
 When I want to relax  
 Others, please specify \_\_\_\_\_

**5. There is a different feeling when comparing times I smoke and don't smoke.**

- True     False     Not sure     Depends on the situation, please explain \_\_\_\_\_

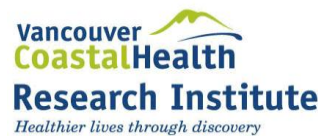

1  
2  
3  
4  
5  
6  
7  
8  
9  
10  
11  
12  
13  
14  
15  
16  
17  
18  
19  
20  
21  
22  
23  
24  
25  
26  
27  
28  
29  
30  
31  
32  
33  
34  
35  
36  
37  
38  
39  
40  
41  
42  
43  
44  
45  
46  
47  
48  
49  
50  
51  
52  
53  
54  
55  
56  
57  
58  
59  
60

**6. What are the things you like about smoking?**

**(Choose all that are applicable to you)**

- It helps me to relax
- It helps to break up my working time
- It helps me to cope with stress
- It keeps me busy when I am bored
- I just enjoy it
- It is something I have in common with my friends or family
- It stops me from putting on weight

**7. What are the things you don't like about your smoking?**

- I don't have anything that I dislike about smoking
- It is expensive
- It affects my health
- I don't like feeling dependent on cigarettes
- It makes my clothes and breath smell
- It is a bad example for children
- It is unpleasant for people near me
- It makes me less fit
- People put a negative image on me
- It is bad for the health of people near me

**8. Certain situations trigger me to smoke**

- True     False     Not sure

**If true, what are the situations?**

- Happiness/ Joy
- Relaxed
- Social gathering
- Receive bad news
- Receive good news
- Stress
- Frustration
- Boredom
- Loneliness
- Anger
- Sadness
- Lost concentration
- Wanting to be like others (e.g., friends, members of my group)
- Other, please specify \_\_\_\_\_

**9. Where do you smoke mostly?**

- Indoors
- Porch/outside of home
- Outside
- Workplace
- In the car
- Others, please specify \_\_\_\_\_

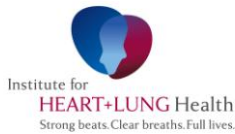

**D. Your perception about the following statement**

**1. Smoking kills germs and bacteria.**

True     False     Not sure

**2. My body needs nicotine.**

True     False     Not sure

**3. Smoking is an addiction.**

True     False     Not sure

**4. Smoking is cool.**

True     False     Not sure

**5. Smoking has changed my daily routine (work, study, exercise, food intake, and sleep).**

True     False     Not sure

**If true, how has it changed your daily routine?**

---

**6. Smoking has affected my health (i.e., lung disease, coughing, phlegm, cancer, shortness of breath, heart disease, blood pressure, energy, wrinkles, asthma)?**

True     False     Not sure

**If true, how has it affected your health?**

---

**7. There are health-related problems I'm worried about while I smoke.**

True     False     Not sure

**If true, what are they?**

Lung disease

Shortness of breath

Cough

Cancer

Heart disease

Change in blood pressure

Less energized

Dependence on medication intake

Decrease in oxygen intake

Wrinkles

Early death

Others, please specify \_\_\_\_\_

**8. What do you think are the advantages of you smoking cigarettes?**

---

**9. What do you think are the disadvantages of you smoking cigarettes?**

---



1  
2  
3  
4  
5  
6  
7  
8  
9  
10  
11  
12  
13  
14  
15  
16  
17  
18  
19  
20  
21  
22  
23  
24  
25  
26  
27  
28  
29  
30  
31  
32  
33  
34  
35  
36  
37  
38  
39  
40  
41  
42  
43  
44  
45  
46  
47  
48  
49  
50  
51  
52  
53  
54  
55  
56  
57  
58  
59  
60

**10. Do you have any other feelings about you smoking cigarettes?**

---

**E. Your experience and thoughts on quitting and quitting methods**

**1. I was nagged by someone to quit smoking.**

True  False

**If true, who nagged you?**

---

**2. I have gone to the doctor for symptoms related to my lungs.**

True  False  Not related to my smoking

**3. I have had a lung examination at the physician's office or hospital.**

True  False  Not related to my smoking

**4. I have tried to quit before.**

True  False

**If true, how many times have you tried?** \_\_\_\_\_

**What methods did you try?**

---

**What was the longest duration you were able to quit for?**

---

**Why couldn't you quit?**

---

**5. Where have you received or heard of smoking cessation methods?**

**(Choose all that are applicable to you)**

- I never heard about or received any information  
 Family or friends  
 Hospitals/clinics  
 Pharmacy  
 Media  
 Others, please specify \_\_\_\_\_

**6. I have thought about cutting down my cigarette intake before.**

True  False  Not sure

**If true, what was your reason to cut down?**

---

**If true, has your intake of cigarettes cut down now?**  Yes  No

**7. I have tried nicotine replacement therapy.**

True  False  Not sure what nicotine is

**If true, did it work? Why or why not?**

---



---



**8. I have thought about (intention) quitting before.**

- True     False     Not sure

**If true, what was your reason for quitting?**

---

**If false, what was the reason for not quitting?**

---

**9. I have met difficulty in quitting before.**

- True     False     Not applicable

**If true, what was your difficulty?**

- I enjoy smoking too much  
 I don't think I have enough willpower  
 I think I would put on weight  
 I would be too stressed  
 I think I am too addicted to cigarettes  
 My partner smokes  
 My best friend smoke  
 I would miss smoking with friends  
 I don't really want to stop  
 I would be bored  
 I would miss smoking breaks at work  
 Others, please specify \_\_\_\_\_

**10. In your opinion, what are the withdrawal symptoms due to quitting?**

- 
- I don't know what the withdrawal symptoms are.

**11. I would benefit more from smoking than suffering from withdrawal symptoms due to quitting.**

- True     False     Not sure

**If true, why is it?**

---

**12. There are people that support me for quitting.**

- True     False     Not sure     Not applicable

**If true, who supports you?**

---

**If true, what kinds of support did they provide you?**

---

**13. I would consider quitting in the future.**

- True     False     Not sure

**If true, what would be your reason for quitting in the future?**

---

**If true, what immediate reward would you like to get?**

---

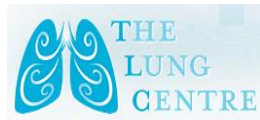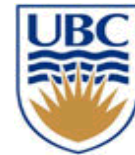

1  
2  
3  
4  
5  
6  
7  
8  
9  
10  
11  
12  
13  
14  
15  
16  
17  
18  
19  
20  
21  
22  
23  
24  
25  
26  
27  
28  
29  
30  
31  
32  
33  
34  
35  
36  
37  
38  
39  
40  
41  
42  
43  
44  
45  
46  
47  
48  
49  
50  
51  
52  
53  
54  
55  
56  
57  
58  
59  
60

14. I would quit smoking if people I spend time with quit also.

True     False     Not sure

If true, why?

---

15. I will be able to quit whenever I want.

True     False     Not sure

16. If you were to quit, what would be the most influential motivation?

---

17. What positive feelings would most help you in becoming a non-smoker?  
(Choose all that are applicable to you)

Confidence

Determination

Calm

Relaxation

Caring about myself

Caring about others

Others, please specify \_\_\_\_\_

18. Imagine that you are now a former smoker:

a) What could you do with the money you save?

---

b) How would your medication be different, if you are currently taking medication?

---

c) What would be your energy level?

---

d) What would be the quality of your life?

---

e) How would you be feeling physically as a non-smoker?

---

#### F. Your relationship with others

1. My smoking behaviour has changed my relationship with others. (Family, co-workers, classmates, and friends)

True     False     Not sure

If true, how has it changed your relationship with others?

---

2. Which people, or organization that you know, would approve of you smoking cigarettes?

---



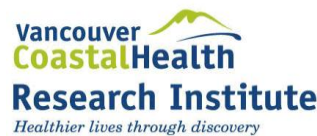

3. Which people, or organization that you know, would disapprove of you smoking cigarettes?

---

4. I would encourage others (Family, co-workers, classmates, and friends) to smoke.

True     False     Not sure

If true, why would you encourage others to smoke?

---

If false, why would you not encourage others to smoke?

---

5. I would encourage others to quit.

True     False     Not sure

If true, what do you think is the best model to encourage people in your age group to quit?

---

6. I mind smoking in front of non-smokers.

True     False     Not sure

If true, why would you not smoke in front of non-smokers?

---

7. I mind smoking in front of young children.

True     False     Not sure

If true, why would you not smoke in front of young children?

---

8. I think second and third hand smoke is not as harmful as first hand smoke.

True     False     I don't know what third hand smoke is

#### G. Cultural and environmental influences for your desire to smoke or to quit

1. Media such as visual warnings on cigarette packages has influenced me to quit smoking.

True     False     Not sure     Not applicable

2. Living in Canada has influenced my smoking habits or desire to quit.

True     False     Not sure

If true, how has it influenced your smoking habits or desire to quit?

---

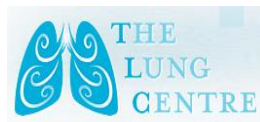

1  
2  
3  
4  
5  
6  
7  
8  
9  
10  
11  
12  
13  
14  
15  
16  
17  
18  
19  
20  
21  
22  
23  
24  
25  
26  
27  
28  
29  
30  
31  
32  
33  
34  
35  
36  
37  
38  
39  
40  
41  
42  
43  
44  
45  
46  
47  
48  
49  
50  
51  
52  
53  
54  
55  
56  
57  
58  
59  
60

3. **The different social norms in Canada have influenced my smoking behaviour in comparison to my native country.**

True     False     Not sure

**If true, how has it influenced your smoking behaviour in comparison to your native country?**

---

4. **In your culture, smoking is a behaviour that one gender engages in more than other.**

True     False     Not sure

**If true, which gender?**

Male     Female

5. **In your culture, smoking is a behaviour that a certain career profession engages in more than other.**

True     False     Not sure

**If true, which career profession?**

---

6. **People do not accept the smoking habit in my culture.**

True     False     Not sure

**If true, why do they not accept the smoking habit?**

---

7. **Most people in my culture smoke.**

True     False     Not sure

8. **What is your image of a smoker? Do you think it is a positive or negative image?**

Positive image     Negative image     Not sure

**Why? Please explain.**

---

9. **In your opinion, how can a smoker harm or benefit the society?**

---

10. **In your opinion, what would be a good enforcement to stop the younger generation from smoking?**

---

11. **In your opinion, what should be the role of mass media?**

---

12. **What do you know about a cigarette? What does it do to the human body?**

---

## STROBE Statement—checklist of items that should be included in reports of observational studies

|                              | Item No | Recommendation                                                                                                                                                                                                                                                                                                                                                                                                                                                                                                                                                                                                                                                                                   |
|------------------------------|---------|--------------------------------------------------------------------------------------------------------------------------------------------------------------------------------------------------------------------------------------------------------------------------------------------------------------------------------------------------------------------------------------------------------------------------------------------------------------------------------------------------------------------------------------------------------------------------------------------------------------------------------------------------------------------------------------------------|
| <b>Title and abstract</b>    | 1       | (a) Indicate the study's design with a commonly used term in the title or the abstract<br>(b) Provide in the abstract an informative and balanced summary of what was done and what was found                                                                                                                                                                                                                                                                                                                                                                                                                                                                                                    |
| <b>Introduction</b>          |         |                                                                                                                                                                                                                                                                                                                                                                                                                                                                                                                                                                                                                                                                                                  |
| Background/rationale         | 2       | Explain the scientific background and rationale for the investigation being reported                                                                                                                                                                                                                                                                                                                                                                                                                                                                                                                                                                                                             |
| Objectives                   | 3       | State specific objectives, including any prespecified hypotheses                                                                                                                                                                                                                                                                                                                                                                                                                                                                                                                                                                                                                                 |
| <b>Methods</b>               |         |                                                                                                                                                                                                                                                                                                                                                                                                                                                                                                                                                                                                                                                                                                  |
| Study design                 | 4       | Present key elements of study design early in the paper                                                                                                                                                                                                                                                                                                                                                                                                                                                                                                                                                                                                                                          |
| Setting                      | 5       | Describe the setting, locations, and relevant dates, including periods of recruitment, exposure, follow-up, and data collection                                                                                                                                                                                                                                                                                                                                                                                                                                                                                                                                                                  |
| Participants                 | 6       | (a) <i>Cohort study</i> —Give the eligibility criteria, and the sources and methods of selection of participants. Describe methods of follow-up<br><i>Case-control study</i> —Give the eligibility criteria, and the sources and methods of case ascertainment and control selection. Give the rationale for the choice of cases and controls<br><i>Cross-sectional study</i> —Give the eligibility criteria, and the sources and methods of selection of participants<br>(b) <i>Cohort study</i> —For matched studies, give matching criteria and number of exposed and unexposed<br><i>Case-control study</i> —For matched studies, give matching criteria and the number of controls per case |
| Variables                    | 7       | Clearly define all outcomes, exposures, predictors, potential confounders, and effect modifiers. Give diagnostic criteria, if applicable                                                                                                                                                                                                                                                                                                                                                                                                                                                                                                                                                         |
| Data sources/<br>measurement | 8*      | For each variable of interest, give sources of data and details of methods of assessment (measurement). Describe comparability of assessment methods if there is more than one group                                                                                                                                                                                                                                                                                                                                                                                                                                                                                                             |
| Bias                         | 9       | Describe any efforts to address potential sources of bias                                                                                                                                                                                                                                                                                                                                                                                                                                                                                                                                                                                                                                        |
| Study size                   | 10      | Explain how the study size was arrived at                                                                                                                                                                                                                                                                                                                                                                                                                                                                                                                                                                                                                                                        |
| Quantitative variables       | 11      | Explain how quantitative variables were handled in the analyses. If applicable, describe which groupings were chosen and why                                                                                                                                                                                                                                                                                                                                                                                                                                                                                                                                                                     |
| Statistical methods          | 12      | (a) Describe all statistical methods, including those used to control for confounding<br>(b) Describe any methods used to examine subgroups and interactions<br>(c) Explain how missing data were addressed<br>(d) <i>Cohort study</i> —If applicable, explain how loss to follow-up was addressed<br><i>Case-control study</i> —If applicable, explain how matching of cases and controls was addressed<br><i>Cross-sectional study</i> —If applicable, describe analytical methods taking account of sampling strategy<br>(e) Describe any sensitivity analyses                                                                                                                                |

Continued on next page

**Results**

|                  |     |                                                                                                                                                                                                                                                                                                                                                                                                               |
|------------------|-----|---------------------------------------------------------------------------------------------------------------------------------------------------------------------------------------------------------------------------------------------------------------------------------------------------------------------------------------------------------------------------------------------------------------|
| Participants     | 13* | (a) Report numbers of individuals at each stage of study—eg numbers potentially eligible, examined for eligibility, confirmed eligible, included in the study, completing follow-up, and analysed<br>(b) Give reasons for non-participation at each stage<br>(c) Consider use of a flow diagram                                                                                                               |
| Descriptive data | 14* | (a) Give characteristics of study participants (eg demographic, clinical, social) and information on exposures and potential confounders<br>(b) Indicate number of participants with missing data for each variable of interest<br>(c) <i>Cohort study</i> —Summarise follow-up time (eg, average and total amount)                                                                                           |
| Outcome data     | 15* | <i>Cohort study</i> —Report numbers of outcome events or summary measures over time<br><i>Case-control study</i> —Report numbers in each exposure category, or summary measures of exposure<br><i>Cross-sectional study</i> —Report numbers of outcome events or summary measures                                                                                                                             |
| Main results     | 16  | (a) Give unadjusted estimates and, if applicable, confounder-adjusted estimates and their precision (eg, 95% confidence interval). Make clear which confounders were adjusted for and why they were included<br>(b) Report category boundaries when continuous variables were categorized<br>(c) If relevant, consider translating estimates of relative risk into absolute risk for a meaningful time period |
| Other analyses   | 17  | Report other analyses done—eg analyses of subgroups and interactions, and sensitivity analyses                                                                                                                                                                                                                                                                                                                |

**Discussion**

|                  |    |                                                                                                                                                                            |
|------------------|----|----------------------------------------------------------------------------------------------------------------------------------------------------------------------------|
| Key results      | 18 | Summarise key results with reference to study objectives                                                                                                                   |
| Limitations      | 19 | Discuss limitations of the study, taking into account sources of potential bias or imprecision. Discuss both direction and magnitude of any potential bias                 |
| Interpretation   | 20 | Give a cautious overall interpretation of results considering objectives, limitations, multiplicity of analyses, results from similar studies, and other relevant evidence |
| Generalisability | 21 | Discuss the generalisability (external validity) of the study results                                                                                                      |

**Other information**

|         |    |                                                                                                                                                               |
|---------|----|---------------------------------------------------------------------------------------------------------------------------------------------------------------|
| Funding | 22 | Give the source of funding and the role of the funders for the present study and, if applicable, for the original study on which the present article is based |
|---------|----|---------------------------------------------------------------------------------------------------------------------------------------------------------------|

\*Give information separately for cases and controls in case-control studies and, if applicable, for exposed and unexposed groups in cohort and cross-sectional studies.

**Note:** An Explanation and Elaboration article discusses each checklist item and gives methodological background and published examples of transparent reporting. The STROBE checklist is best used in conjunction with this article (freely available on the Web sites of PLoS Medicine at <http://www.plosmedicine.org/>, Annals of Internal Medicine at <http://www.annals.org/>, and Epidemiology at <http://www.epidem.com/>). Information on the STROBE Initiative is available at [www.strobe-statement.org](http://www.strobe-statement.org).

# BMJ Open

## Assessing beliefs and risk perceptions on smoking and smoking cessation in immigrant Chinese adult smokers residing in Vancouver, Canada: a cross-sectional study

|                                 |                                                                                                                                                                                                                                                      |
|---------------------------------|------------------------------------------------------------------------------------------------------------------------------------------------------------------------------------------------------------------------------------------------------|
| Journal:                        | <i>BMJ Open</i>                                                                                                                                                                                                                                      |
| Manuscript ID:                  | bmjopen-2014-006435.R2                                                                                                                                                                                                                               |
| Article Type:                   | Research                                                                                                                                                                                                                                             |
| Date Submitted by the Author:   | 28-Dec-2014                                                                                                                                                                                                                                          |
| Complete List of Authors:       | FitzGerald, J Mark; University of British Columbia, Respiratory Medicine Division<br>Poureslami, Iraj; University of British Columbia, Respiratory Medicine Division<br>Shum, Jessica; University of British Columbia, Respiratory Medicine Division |
| <b>Primary Subject Heading</b>: | Smoking and tobacco                                                                                                                                                                                                                                  |
| Secondary Subject Heading:      | Smoking and tobacco                                                                                                                                                                                                                                  |
| Keywords:                       | Change management < HEALTH SERVICES ADMINISTRATION & MANAGEMENT, Organisation of health services < HEALTH SERVICES ADMINISTRATION & MANAGEMENT, Risk management < HEALTH SERVICES ADMINISTRATION & MANAGEMENT                                        |
|                                 |                                                                                                                                                                                                                                                      |

SCHOLARONE™  
Manuscripts

Only

1  
2  
3 **Title: Assessing beliefs and risk perceptions on smoking and smoking cessation in**  
4 **immigrant Chinese adult smokers residing in Vancouver, Canada: a cross-sectional study**  
5  
6

7  
8 **Corresponding author:**

9 Dr. J. Mark FitzGerald  
10 The Lung Centre, 7<sup>th</sup> Floor  
11 Gordon and Leslie Diamond Health Care Centre  
12 2775 Laurel Street  
13 Vancouver, BC, Canada  
14 V5Z 1M9  
15 Email: [mark.fitzgerald@vch.ca](mailto:mark.fitzgerald@vch.ca)  
16 Phone: 604-875-4122  
17  
18  
19  
20  
21

22  
23 **Co-authors:**

24 Dr. Iraj Poureslami  
25 UBC, Faculty of Medicine, Respiratory Medicine Division  
26 Centre for Clinical Epidemiology and Evaluation (C2E2)  
27 Vancouver General Hospital – Research Pavilion  
28 716-828 West 10<sup>th</sup> Avenue  
29 Vancouver, BC, Canada  
30 V5Z 1M9  
31  
32  
33  
34

35  
36 Jessica Shum  
37 UBC, Faculty of Medicine, Respiratory Medicine Division  
38 Centre for Clinical Epidemiology and Evaluation (C2E2)  
39 Vancouver General Hospital – Research Pavilion  
40 828 West 10<sup>th</sup> Avenue  
41 Vancouver, BC, Canada  
42 V5Z 1M9  
43  
44  
45  
46  
47

48 **Keywords:** smoking, Chinese communities, beliefs, risk perceptions, smoking cessation  
49

50  
51 **Word count: 4724**

52  
53 **Abstract: 299**  
54  
55  
56

**What this paper adds:**

1. Understanding the beliefs, perceptions, and practice of Chinese Mandarin and Cantonese communities about smoking and smoking cessation creates opportunities to tailor smoking cessation interventions according to the needs of these communities.
2. Previously, most studies have applied an identical risk perception model on smoking behavior assessments among young vs. old and male vs. female smokers. However, our study identified that risk perceptions about smoking and smoking consequences differ in the smoking population group based on their age and gender. Therefore, a different model of risk perception should be designed and applied considering the age and gender of participants.
3. Despite existing knowledge that Chinese communities are heterogeneous, our study found that smoking habits, perceptions, beliefs, and practices differ in Mandarin speaking compared to Cantonese speaking Chinese.

**ABSTRACT**

**Objectives:** We aimed to conduct culturally based participatory research to assess cultural and belief contexts for smoking behaviours within Mandarin and Cantonese communities. Outcome variables were smoking-related knowledge, smoking patterns, attitudes and beliefs, and perceived barriers and facilitators to successful cessation.

**Design:** A community-based approach was applied involving smokers, community key-informants, and professionals in study design and implementation. Initially, focus groups were conducted and findings were used to develop study instrument. Participants responded once to study questionnaire after informed consent.

**Setting:** Community based in the Greater Vancouver Area, Canada.

**Participants:** 16 Chinese smokers participated in focus groups and subsequently, 167 current Chinese immigrant (137 males and 30 females) smokers from Mandarin and Cantonese communities, recruited with the help of community agencies and collaborating physicians, were enrolled in a cross-sectional study.

**Results:** We found that a majority believed smoking was harmful on their health. Younger smokers (<35 years of age) did not mind smoking in front of young children compared to older smokers ( $\geq 35$  years of age) ( $p < 0.001$ ). People with high school or lower levels of education believed that they would benefit more from smoking than suffering from withdrawal symptoms compared to better educated smokers ( $p < 0.05$ ). Mandarin smokers were significantly more likely to encourage others to quit than Cantonese smokers ( $p < 0.05$ ). Many indicated not receiving adequate support from care providers and lack of access to culturally and linguistically appropriate cessation programs impacted on their ability to quit smoking.



1  
2  
3 **Conclusions:** Our study highlighted the importance of tobacco beliefs and perceptions among  
4  
5 Mandarin and Cantonese speaking immigrants with limited access to healthcare information and  
6  
7 for younger smokers whose attention to health consequences of smoking may be limited as well.  
8  
9 Study participants were generally aware of the health risks and were willing to quit. Access to  
10  
11 appropriate cessation programs would fulfill their willingness.  
12  
13  
14  
15  
16  
17  
18  
19  
20  
21  
22  
23  
24  
25  
26  
27  
28  
29  
30  
31  
32  
33  
34  
35  
36  
37  
38  
39  
40  
41  
42  
43  
44  
45  
46  
47  
48  
49  
50  
51  
52  
53  
54  
55  
56  
57  
58  
59  
60

For peer review only

## Article Summary

### Strengths and Limitations of this study

- We undertook a community-based participatory approach, with community key-informants and healthcare providers being heavily involved in all aspects of the study such as design, instrument development, implementation, community outreach, and dissemination. These key-stakeholders are important allies in developing culturally and linguistically appropriate smoking cessation interventions.
- Our study provides evidence that attitudes and beliefs towards cigarette smoking differ between groups based on language, age, and gender. The differences with regards to tobacco smoking appear to be related to attitudes or knowledge.
- The results build a window of opportunity to promote tailored cessation interventions incorporating cultural beliefs, perceptions, and practices for Chinese immigrant communities.
- We used a convenience sampling method, which may not reflect the actual smoking prevalence and patterns of Chinese Mandarin and Cantonese immigrants in the Greater Vancouver Area.
- All responses were by self-report and validation of smoking behaviours or reasons to quit or continue smoking was not possible with a cross-sectional design.

## BACKGROUND

Tobacco use remains the leading cause of preventable morbidity and mortality in the world. [1-3] In Canada, its use has been declining slower than expected in spite of increased taxation on cigarettes and more stringent tobacco policies put into place. [3] In order to accomplish the goal of reducing the rate of smokers among Canadian adults, smoking has to be addressed among all sub-populations, especially those with a higher smoking prevalence than the general population. Global studies have shown that those who stop smoking greatly reduce their risk of developing cardio pulmonary disease and that in general the longer the period of cessation, the greater is the reduction in risk.[4,5] Minority and immigrant communities in Canada may be at greater risk of smoking-related illnesses.[6] Reasons include lack of knowledge and awareness about the link between smoking and lung disease;[7] limited access to smoking cessation programs due to cultural, language, and systemic barriers; [8] and smoking behaviours.[9,10] In addition, many immigrants from low-and-middle-income countries have had prior significant exposure to biomass and bio-fuel as well as smoking which further increases their risk.[11] This is particularly true among immigrants from Mandarin and Cantonese speaking communities (the largest immigrant minority groups living in the BC and Canada)[12,13] where smoking rates remains high.[9,10] Such extensive tobacco use among immigrants may be due to the fact that smoking is a largely integrated into the Chinese male culture.[14] Nearly two of every three adult men in China are smokers.[15,16] It is, therefore, empirically relevant to try to understand this immigrant group's smoking knowledge, behaviours, and habits and develop culturally appropriate educational and counselling services to improve tobacco prevention attempts and promote cessation. Maximizing tobacco control for newcomers requires a special understanding of smoking pattern and beliefs of new immigrant populations. The objectives of this study were:

1  
2  
3 1) to explore smoking use patterns, smoking-related knowledge, beliefs and attitudes, and  
4  
5 perceived barriers and facilitators to smoking cessation among Mandarin and Cantonese  
6  
7 speaking communities living in the Greater Vancouver Area (GVA), and 2) to assess the  
8  
9 effectiveness of socio-cultural and environmental factors which influenced the onset of smoking  
10  
11 and smoking habits (continued smoking) among the study participants. We were also interested  
12  
13 to identify differences in above mentioned variables between males and females, Mandarin and  
14  
15 Cantonese, and between age and education level groups. The identification of tobacco use and  
16  
17 other related patterns may help facilitate the development of community-based culturally  
18  
19 appropriate interventions targeting tobacco use and would be helpful for future research for  
20  
21 Chinese immigrants in future research.  
22  
23  
24  
25  
26  
27  
28

## 29 **METHODS**

### 30 **Project Design**

31  
32 This multi-stage cross-sectional study employed both qualitative and quantitative components  
33  
34 within an over-arching community-based participatory framework. The first stage comprised the  
35  
36 development and testing of a measurement instrument for the survey study. The second stage  
37  
38 was a quantitative study assessing the outcome variables including smokers' awareness of  
39  
40 smoking and its cessation, attitudes and beliefs about smoking harms and benefits, and cultural  
41  
42 norms of smoking in their community.  
43  
44  
45  
46  
47

48 The study was conducted between January 2013 and June 2014, allowing for participation and  
49  
50 collaboration between members of the Mandarin and Cantonese communities and other key-  
51  
52 stakeholders such as professionals and researchers in the research process.[17-19] Connections  
53  
54 and networking were built with community key-informants and community agencies (e.g.,  
55  
56

1  
2  
3 SUCCESS (United Chinese Community Enrichment Services Society), Vancouver Coastal  
4  
5 Health community organizations, etc.) supporting active involvement and contribution in study  
6  
7 design, development and implementation. Community collaborators provided assistance with  
8  
9 recruitment of Mandarin and Cantonese smokers as well as input and suggestions on the  
10  
11 development of focus group and interview questions. They recruited two males and two females  
12  
13 who were members of the community, fluent in Mandarin and Cantonese, to work in alliance  
14  
15 with 4 female bilingual Chinese research assistants. All community facilitators and research  
16  
17 assistants received appropriate training prior the study. The training included approaches on how  
18  
19 to best recruit study participants, understanding of the project's goals and objectives, how to  
20  
21 conduct focus groups and individual interviews with smokers from their own communities, and  
22  
23 ideas on how the team could work together effectively in collection of the best information  
24  
25 possible on Chinese smokers' knowledge, beliefs and attitudes about harms and benefits of  
26  
27 smoking, and socio-cultural and environmental factors affecting smoking and smoking cessation.  
28  
29 The community researchers transcribed and translated focus group and interview discussions and  
30  
31 we applied the collected information in the development of a study measurement tool and  
32  
33 conceptual framework. In addition, findings from our previous qualitative smoking study  
34  
35 (conducted with smokers from the same communities) were used in the development of the study  
36  
37 design and measurement tool. [20]  
38  
39  
40  
41  
42  
43  
44  
45  
46  
47

## 48 **Ethics**

49  
50 Ethics approval was obtained for this study from the University of British Columbia Research  
51  
52 Ethics Board. All participants signed a written consent form in their preferred written language  
53  
54 (Chinese Simplified, Chinese Traditional, or English) translated by the bilingual researchers who  
55  
56

---

1  
2  
3 clearly explained the study rationale, goals and objectives, and how their involvement would be  
4  
5 like prior to the study.  
6  
7  
8  
9

### 10 **Study Measurement Tool**

11  
12 We initially developed the study measurement tool by determining whether any English or  
13  
14 Chinese language questionnaires were currently in use to assess attitudes and beliefs re smoking  
15  
16 in the Chinese community. A literature search and an informal survey of immigrant-serving  
17  
18 community agencies did not find any such instrument that has been developed in Canadian  
19  
20 Chinese context. Given the absence of a validated assessment questionnaire in the target  
21  
22 languages for Canadian Chinese, a new measurement tool was developed over a 4-month period.  
23  
24 Development of the study measurement tool began with information collected from initial focus  
25  
26 group session participants (n=14) and individual interviews (n=2), review of relevant literature  
27  
28 that addressed knowledge of, attitudes to, and behaviors in relation to tobacco use, and also our  
29  
30 previous smoking-related qualitative studies with Mandarin and Cantonese current and ex-  
31  
32 smokers.[20,21] Moreover, a professional measurement tool developer (a PhD in the socio-  
33  
34 psychology research and evaluation field from University of British Columbia) with expertise in  
35  
36 developing mixed open-ended and closed-format questionnaires was involved in the face and  
37  
38 content validation and finalization of the measurement tool. The team and the measurement  
39  
40 developer have the expertise to identify and differentiate between beliefs, attitudes and  
41  
42 perceptions, as well as the socio-cultural and environmental aspects of smoking and its cessation.  
43  
44 Each set of variables were identified and separated by heading-title in the questionnaire. The  
45  
46 internal consistency of the data was checked by test-retesting reliability, where the study  
47  
48 questionnaire was administered to 5 smokers and tested again a week after and the results of the  
49  
50  
51  
52  
53  
54  
55  
56  
57

1  
2  
3 initial assessment and retest were compared. Also, more advanced process was applied by  
4  
5 calculating Cronbach Alpha and a coefficient was (.89).  
6  
7

8 The final questionnaire covered current smoking knowledge, beliefs and attitudes about smoking  
9  
10 and its cessation, and socio-cultural and environmental factors that promote or prevent smoking  
11  
12 onset and continuation. The tool included 70 questions covering demographics and concepts on  
13  
14 smoking onset, smoking characteristics, perceptions, experience in quitting, social relationships,  
15  
16 and cultural and environmental influences and were in the format of yes/no, true/false, multiple  
17  
18 choice, and open-ended questions (The study measurement tool can be found as Supplementary  
19  
20 File 1). The questionnaire was also reviewed by a number of key-informants and health  
21  
22 practitioners (n=9) from the target communities who provided feedback and comments re the  
23  
24 questionnaire and checked its face and content validity. The bilingual Chinese research assistants  
25  
26 worked collaboratively together translating the study measurement tool to Chinese Simplified  
27  
28 and Traditional formats. The translations were reviewed by secondary (back-up) translators from  
29  
30 the target communities who were introduced by the collaborating immigrant agencies for  
31  
32 accuracy and correctness. The tool was then reviewed by the community key-informants and  
33  
34 professionals for further crosschecking. Finally we pilot tested the questionnaire with selected  
35  
36 smokers and ex-smokers from the Chinese communities (n=5) to confirm validation of the  
37  
38 measurement tool and for cultural relevance and clarification, as well as translation purposes  
39  
40 including understandability, acceptability, and applicability. Suggestions were integrated into a  
41  
42 revised version.  
43  
44  
45  
46  
47  
48  
49

### 50 **Participant Recruitment**

51 Eligibility criteria for participants were adults ( $\geq 21$  years old) who were current smokers  
52  
53 (defined by having smoked at least 5 cigarettes per day during the past 30 days), Chinese descent  
54  
55  
56

1  
2  
3 (either Mandarin or Cantonese speaking) and be immigrants to Canada or children of Chinese  
4 immigrants. Participants were recruited from within the communities using a variety of outreach  
5 methods such as posting flyers and referral applied from previous studies and through network  
6 with community agency collaborators. [17,22,23] In total, 16 Chinese smokers participated in  
7 initial focus groups and interviews and subsequently 167 (137 males and 30 females) were  
8 interviewed, from which 93 were Mandarin speaking and 73 were Cantonese speaking. In terms  
9 of age category, 90 participants were <35 years of age and 76 were ≥35 years of age. Our  
10 intended sample size was 150 Chinese smokers aiming to identify mean differences in  
11 knowledge, beliefs, attitudes, and practices related to smoking and experience in smoking  
12 cessation between age, gender, education, and ethnicity groups.  
13  
14  
15  
16  
17  
18  
19  
20  
21  
22  
23  
24  
25  
26  
27  
28

### 29 **Data Collection**

30 Data was collected through administration of study questionnaire via individual interviews.  
31 Interview sessions were conducted at places and times of convenience for participants: e.g.,  
32 participants' homes, community centers, and our research centre. Printed consent forms were  
33 explained and signed preceding the interview. Modest honoraria were paid to cover time, travel,  
34 and parking expenses. Community research assistants conducted the interviews in Mandarin or  
35 Cantonese and the participants filled in a self reported Chinese Simplified and Chinese  
36 Traditional questionnaire while the research assistants were available to answer any questions  
37 that they would have had, or ask the responders to elaborate the given information in the open-  
38 ended questions. Each interview was conducted by two interviewers: one with an academic  
39 perspective (a research assistant), and one from community who acted as a facilitator. The two  
40 interviewers took notes during interviews including verbal and non-verbal communication by the  
41  
42  
43  
44  
45  
46  
47  
48  
49  
50  
51  
52  
53  
54  
55  
56  
57

---



1  
2  
3 participants and reviewed their notes at the end of each interview aiming to improve the accuracy  
4  
5 of the information, capturing smokers' smoking beliefs, perceptions, and also their comments  
6  
7 about cultural images of smoking and its cessation. In some instances (e.g., old smokers or low  
8  
9 literate people), the research assistants assisted by administered the study questionnaire verbally  
10  
11 while taking notes throughout the entire interview.  
12  
13

### 14 15 16 17 18 **Data analysis**

19  
20 SPSS v20 (2012) was used for all statistical tests. Descriptive statistical tests were used and the  
21  
22 results were presented in tables and graphs. Relevant inferential statistics were calculated for the  
23  
24 entire sample and stratified according to age, gender, level of education, language of origin, and  
25  
26 smoking practices. The data were not normally distributed, and non-parametric tests were  
27  
28 therefore used; e.g., chi-square test for nominal data, Mann–Whitney test for ordinal data with  
29  
30 two groups, and Kruskal–Wallis test for more than two groups with ordinal data. Binary logistic  
31  
32 regression was used to determine the effects of demographics on the outcome variables. All data  
33  
34 were examined regarding distributions and trends in the data, and the level of significance was  
35  
36 set at the  $P < 0.05$  level.  
37  
38  
39

### 40 41 42 43 **Sample Size Calculation**

44  
45 With a total sample size of 167 subjects for the cross-sectional study, we estimated that we could  
46  
47 identify mean differences between different age, gender, language and education level groups  
48  
49 and with an effect size of 0.45 with 80% statistical power and a two-sided significance level of  
50  
51  $P < 0.05$ .  
52  
53  
54  
55  
56

## FINDINGS

Between May 2013 and April 2014, we recruited and enrolled 167 current smokers. **Table 1** describes characteristics of the study sample for both Mandarin (55.7%, n=93) and Cantonese (44.3%, n=74). The participants included predominately males (82%, n=137). The median age was 35 and we used this cut off point for younger/older groups, as used previously from our qualitative studies conducted with Chinese community smokers, [20] allowing us to identify these differences in perspective.

**Table 1. Participant characteristics**

|                             | N   | %    |
|-----------------------------|-----|------|
| <b>Gender</b>               |     |      |
| Male                        | 137 | 82   |
| Female                      | 30  | 18   |
| <b>Language</b>             |     |      |
| Mandarin                    | 93  | 55.7 |
| Cantonese                   | 74  | 44.3 |
| <b>Age</b>                  |     |      |
| <35                         | 105 | 63   |
| ≥35                         | 62  | 37   |
| <b>Education Level</b>      |     |      |
| High school and below       | 87  | 52   |
| University degree and above | 80  | 48   |

### Smoking-related knowledge and reasons for starting smoking

Knowledge of smoking consequences is an important factor to consider when designing smoking cessation programs or implementing health promotion interventions, especially to prevent onset of smoking among young people.[2,8] Almost an equal number (23%) of Mandarin and Cantonese smokers indicated that they were not aware of smoking side effects when they started smoking. Table 2 provides the breakdown of smoking-related knowledge by gender, age,

language, and education level. As shown on table 2, knowledge about side effects of smoking was mixed among the participants of this study, with no statistically significant differences observed between the language, gender, age, and education groups in this regard.

**Table 2.** ‘At the time you started smoking, did you know the side effects of smoking?’

|                             | Yes |    | No |    |
|-----------------------------|-----|----|----|----|
|                             | N   | %  | N  | %  |
| <b>Gender</b>               |     |    |    |    |
| Male                        | 105 | 77 | 32 | 23 |
| Female                      | 22  | 73 | 8  | 27 |
| <b>Age</b>                  |     |    |    |    |
| <35                         | 90  | 86 | 15 | 14 |
| ≥35                         | 38  | 62 | 24 | 39 |
| <b>Language</b>             |     |    |    |    |
| Mandarin                    | 72  | 77 | 21 | 23 |
| Cantonese                   | 56  | 76 | 18 | 24 |
| <b>Education Level</b>      |     |    |    |    |
| High school under           | 61  | 70 | 26 | 30 |
| University degree and above | 67  | 84 | 13 | 16 |

We also aimed to determine the *socio-cultural and environmental* factors which influenced the onset of smoking among the study participants.[24] In this study, we defined social factors as smoking during the gatherings, being offered cigarettes by peers (a cultural norm in this community), smoking to feel being accepted, etc. On average for 45% (n=75) of participants, ‘social factors’ were a trigger to start smoking, while it was the number one trigger for male smokers and smokers with who were 35 years or over with an equal rate of 53%. Although 50% of females mentioned ‘emotional factors’ as a contributor to starting smoking, only 22% (on average) of males cited these as factors for them. Likewise, ‘environmental factors’ were considered by only 20% of participants as a factor in starting to smoke, while 50% of Mandarin smokers mentioned environmental factors as a major trigger for them to start smoking. A smoking friend was mentioned by most of participants (66.3%) as someone in their social

network when starting smoking, compared to classmate (48.5%), family (29%), and work-related colleagues (28%). An interesting observation was that 50% of female smokers in the study identified having a family member who smoked when they first started smoking.

### Smoking beliefs, perceptions, and attitudes

Multiple factors affected participants to become regular smokers. For instance, for around 62% of smokers (between 100 to 104), the main reasons to smoke regularly were the beliefs that smoking '*relaxed them*' and '*helped them feel less stress*' as well as when '*they were having a break*' or when '*they were bored*'. The breakdown of the triggers to smoke based on smokers' gender, age, language, and education groups are shown on Table 3, with no statistically significant differences observed between the male and female smokers, and different age, language, and education groups in this regard.

**Table 3. 'Reasons for becoming regular smokers'**

|                             | Relaxation |    | Less stress |    | Having break |    | Being bored |    |
|-----------------------------|------------|----|-------------|----|--------------|----|-------------|----|
|                             | N          | %  | N           | %  | N            | %  | N           | %  |
| <b>Gender</b>               |            |    |             |    |              |    |             |    |
| Female                      | 22         | 73 | 14          | 47 | 17           | 57 | 16          | 53 |
| Male                        | 82         | 60 | 81          | 59 | 83           | 61 | 84          | 61 |
| <b>Age</b>                  |            |    |             |    |              |    |             |    |
| <35                         | 73         | 70 | 62          | 59 | 69           | 66 | 68          | 65 |
| ≥35                         | 31         | 51 | 33          | 53 | 31           | 50 | 34          | 55 |
| <b>Language</b>             |            |    |             |    |              |    |             |    |
| Mandarin                    | 50         | 54 | 57          | 61 | 53           | 57 | 54          | 58 |
| Cantonese                   | 40         | 54 | 38          | 51 | 47           | 64 | 48          | 65 |
| <b>Education Level</b>      |            |    |             |    |              |    |             |    |
| High school under           | 51         | 59 | 45          | 52 | 52           | 60 | 55          | 63 |
| University degree and above | 53         | 66 | 50          | 62 | 48           | 60 | 47          | 59 |

1  
2  
3 We were also interested to identify the *social and cultural* aspects of smoking habits (continued  
4 smoking). When asked the question of whether '*most people in my culture smoke*' to assess  
5 participants' perceived commonality of smoking in their communities, there was a significant  
6  
7  
8  
9  
10 difference between male and female participants ( $\chi^2 = 5.424$ ,  $df = 1$ ,  $P < 0.05$ ) ; more males  
11  
12 (n=46, 34%) believed that smoking was a cultural habit in their community than females (n=17,  
13  
14 57%) did. Similar findings were observed between Mandarin and Cantonese ( $\chi^2 = 5.182$ ,  $df = 1$ ,  
15  
16  $P < 0.05$ ); more Mandarin (n=65) answered yes to the question than Cantonese smokers (n=39).  
17  
18 Many participants (61%) indicated they normally smoked when they were 'with friends'; with  
19  
20 the highest proportion reported among the <35 years old participants (82%) and male  
21  
22 participants (70%). Remarkably, 70% of the <35 years old participants indicated they smoked  
23  
24 when they had alcohol. The rate was 60% among female participants, 57% among males, and  
25  
26 57% among both Mandarin and Cantonese smokers. In terms of attitudes towards exposing  
27  
28 others to second or third-hand smoke, we asked participants '*do you mind smoking in front of*  
29  
30 *non-smokers*'? Younger smokers (<35 years of age) were more likely (n=72) to mention that  
31  
32 they did not mind smoking in front of non-smokers compared to older smokers ( $\geq 35$  years of  
33  
34 age) (n=52). The mean difference was significant ( $\chi^2 = 7.133$ ,  $df = 1$ ,  $P < 0.01$ ). Also, when the  
35  
36 participants were asked whether they minded smoking in front of young children, similarly, more  
37  
38 younger smokers (<35 years of age) (n=97) mentioned that they '*did not mind smoking in front*  
39  
40 *of young children*' than the older smokers (n=55) and the difference was significant ( $\chi^2 = 5.123$ ,  
41  
42  $df = 1$ ,  $P < 0.05$ ). We also aimed to assess smokers' viewpoints regarding second hand smoking  
43  
44 and its harm. We asked whether '*second and third hand smoke was as harmful as first hand*  
45  
46 *smoke*', again, relatively more males said 'no' when compared to female smokers (n= 40 and n=  
47  
48 10, respectively) and the difference was significant ( $\chi^2 = 4.736$ ,  $df = 1$ ,  $P < 0.05$ ). Finally, we  
49  
50  
51  
52  
53  
54  
55  
56  
57

---

1  
2  
3 assessed smokers' beliefs about their own smoking pattern with a self-reported question of '*I*  
4 *have a smoking routine/pattern*'. No significant differences were identified between gender, age,  
5  
6 *have a smoking routine/pattern*'. No significant differences were identified between gender, age,  
7  
8 and language groups. However, we found that more people with high school education or less  
9  
10 mentioned they didn't have a routine/pattern (n=30) compared to people with higher education  
11  
12 (n=12) and the difference was significant ( $\chi^2 = 7.156$ ,  $df = 1$ ,  $P < 0.01$ ).  
13  
14

### 15 16 17 18 **Perceptions about smoking**

19  
20 We assessed smokers' perceived *enjoyable feeling* that they may have due to smoking by asking  
21  
22 whether '*there is a different feeling when comparing times I smoke and don't smoke*' and found a  
23  
24 statistically significant difference between male and female participants ( $\chi^2 = 4.237$ ;  $df = 1$ ,  
25  
26  $P < 0.05$ ). Significantly more males (n=47) mentioned experiencing a different feeling when they  
27  
28 smoked compared to not smoking than female smokers (n=15). In addition, younger smokers  
29  
30 (<35 years of age) as well claimed to have a different feeling when comparing times smoking  
31  
32 and not smoking (n=46) compared to older smokers (n=16), and the differences were statistically  
33  
34 significant ( $\chi^2 = 3.889$ ,  $df = 1$ ,  $P < 0.05$ ). Likewise, more Mandarin smokers (n=41) than  
35  
36 Cantonese smokers (n=20) reported having a different feeling when they smoke compared to  
37  
38 when they were not smoking ( $\chi^2 = 5.188$ ,  $df = 1$ ,  $P < 0.05$ ). For this outcome there was no  
39  
40 significant differences between highly educated (college/university and above) and lower  
41  
42 educated (high school or lower).  
43  
44  
45  
46  
47

48 Additionally, we assessed smokers' perceptions about *helpfulness* of smoking to alleviate their  
49  
50 anxiety and stress. We noticed that 77% of female smokers, 69% of younger smokers (aged 34  
51  
52 years or younger), and 52% of older smokers (age 35 or older) smoked to reduce their sense of  
53  
54  
55  
56

1  
2  
3 helpfulness. Male smokers perceived that smoking helped them to minimize the feeling of being  
4 bored (80%) and made them more connected to their group of friends (69%).  
5  
6  
7  
8  
9

### 10 **Smoking cessation**

11 We aimed to identify willingness to quit smoking and *perceived barriers and facilitators* to  
12 cessation. The majority of participants, in particular young male and female smokers, mentioned  
13 their desire to quit and attempted to several times, before giving up and smoking again. A few  
14 people mentioned using medications or seeking professional advice to quit smoking but mainly  
15 relied on their own willpower to quit. Also, older participants indicated trying to quit due to  
16 health related issues such as heart disease or cancer. We were also interested to find out whether  
17 participants were under pressure by someone close to them to quit smoking. When asked '*I was*  
18 *nagged by someone to quit smoking*', no statistically significant differences were identified in  
19 different gender, age, language, and education groups. However, when we asked whether they  
20 '*would encourage others to quit*', more Mandarin speaking smokers answered yes to (n=45) than  
21 Cantonese speaking smokers (n=23) ( $\chi^2 = 5.172$ ,  $df = 1$ ,  $P < 0.05$ ). No significant differences were  
22 identified based on age, gender, and level of education. In addition, most participants (87%) said  
23 "No" to the question: "*Would you encourage non-smokers to smoke?*" Furthermore, we also  
24 asked whether living in a smoking restricted society like Canada would encourage smokers to  
25 quit or cut down on their smoking. More Mandarin speaking smokers (n=56, 60%) mentioned  
26 that '*living in Canada influenced their smoking habits or desire to quit*', compared to Cantonese  
27 speaking smokers (n=30, 41%) ( $\chi^2 = 6.424$ ,  $df = 1$ ,  $P = 0.011$ ).  
28  
29  
30  
31  
32  
33  
34  
35  
36  
37  
38  
39  
40  
41  
42  
43  
44  
45  
46  
47  
48  
49  
50  
51  
52  
53  
54  
55  
56  
57  
58  
59  
60

More people with high school or lower education (n=34) agreed with the statement *'I would benefit more from smoking than suffering from withdrawal symptoms due to quitting'*, compared to the more educated smokers (n=12) ( $\chi^2 = 6.102$ ,  $df = 1$ ,  $P < 0.05$ ). When asked whether they *'tried nicotine replacement therapy to quit smoking'*, more Mandarin speaking smokers (n=32) mentioned that they had tried this aid to quit smoking compared to Cantonese speaking smokers (n=12) ( $\chi^2 = 7.275$ ,  $df = 1$ ,  $P = 0.007$ ).

In general, participants identified language and literacy issues as barriers to accessing smoking cessation information as well as lack of useful information in a social media format. For instance, older participants mentioned that they had limited exposure to public sources of information on cessation services that were developed in their native language. A small minority of these smokers had received advice and information about the health issues attributed to smoking from their physicians. Younger smokers mentioned the lack of disseminating smoking cessation messages through social media such as text messaging to promote quitting services in their native language.

Our synthesis of the interview data identified seven barriers to the participants' cessation which are summarized in Table 4.

**Table 4.** *Barriers to Smoking Cessation identified by the participants*

| <b>Barriers</b>                                                                                    |
|----------------------------------------------------------------------------------------------------|
| (a) the problems of managing their lives in a highly stressful environment                         |
| (b) their isolation and the limited support systems in their community or work/school environments |



- 1  
2  
3  
4  
5  
6  
7  
8  
9  
10  
11  
12  
13  
14  
15  
16  
17  
18  
19
- (c) the availability of smoking as a social-connection to their peers and limited resources for pleasure
  - (d) perceived minimal health risks of smoking, (e) the commonality of smoking in their community
  - (e) the commonality of smoking in their community
  - (f) the scarce or non-existent information about how to stop smoking
  - (g) the belief that all they can quit on their own whenever they decide to

## 20 21 22 **DISCUSSION**

23  
24  
25  
26  
27  
28  
29  
30  
31  
32  
33  
34  
35  
36  
37  
38  
39  
40  
41  
42  
43  
44  
45  
46  
47  
48  
49  
50  
51  
52  
53  
54  
55  
56  
57  
58  
59  
60

The main goal of this study was to gain insights on the beliefs and perceptions associated with smoking behaviors and smoking cessation among Chinese Cantonese and Mandarin speaking current smokers, taking into account culturally specific knowledge and practices. The results have implications for the development of appropriate smoking cessation programs and educational interventions to prevent and control tobacco-related health issues among the target communities. Such interventions may have policy implications in health promotion programs to prevent smoking onset among younger population groups in the immigrant communities.

Several participants in this study indicated their desire to quit and attempted to do so many times, many of whom did it relying on their own willpower. Only a few, mainly among older smokers, tried to quit because of health related issues. They mentioned that a better communication with primary care providers and ease of access to culturally and linguistically appropriate smoking cessation resources would promote smoking cessation in their communities. Similar findings have been reported in studies done in other countries as well as among many immigrant

1  
2  
3 communities in Canada who tried to quit smoking.[25-28] In addition to elucidating these  
4  
5 barriers to smoking cessation and despite continued smoking, participants showed being  
6  
7 knowledgeable in health related and other negative aspects of smoking as on average, 70% of the  
8  
9 participants indicated they were aware of the health consequences of smoking. This finding has  
10  
11 been confirmed in other studies. [28] In our study, we found that higher education, better  
12  
13 knowledge, and smoking regulations contributed to having a greater intent to quit smoking. For  
14  
15 instance, we found that most participants were not ignorant of the dangers of smoking, with the  
16  
17 vast majority recognizing that smoking posed risks to their own health and the health of those  
18  
19 around them. This knowledge is much higher than that of Chinese smokers who were previously  
20  
21 surveyed in China, where only 36% of participants believed smoking can cause lung cancer and  
22  
23 only 4% were aware of the relationship of smoking to heart disease.[29] In addition, many of the  
24  
25 smokers in our study already accepted limitations on the use of cigarettes in Canada, and many,  
26  
27 mostly younger smokers, supported restrictions on indoor smoking and also mentioned not  
28  
29 smoking at home or where children are present. This could be attributed to the smoking  
30  
31 restriction rules as well as the strong anti-smoking educational campaigns in Canada. For  
32  
33 example, since 2001, Health Canada has spent more than \$480 million for a 5-year program to  
34  
35 encourage tobacco cessation programs for all Canadians.[30] These regulations might be  
36  
37 important to reduce the risk of second-hand and third-hand smoking and related health issues  
38  
39 among young children and other non-smoker family members.  
40  
41  
42  
43  
44  
45  
46  
47  
48

49 In terms of reasons to continue smoking, perceived advantages of smoking such as ‘smoking  
50  
51 does make me feel more comfortable’ and ‘smoking helps me to be stress-free when I have  
52  
53 problems’ appeared to be more important factors to promote smoking continuation among our  
54  
55

1  
2  
3 study participants than perceived disadvantages around 'health issues' and 'money' which shown  
4  
5 to be strong motivators in quitting smoking in some studies. Some studies found that smokers  
6  
7 may not be aware of the diseases caused by smoking and therefore, they may perceive  
8  
9 themselves less susceptible to the risks of smoking.[30-34] For instance, health consequences  
10  
11 and costs of smoking were not perceived as strong motivators to quit smoking among young  
12  
13 participants. They reported the stimulating and anti-stress effects of smoking (smoking may  
14  
15 actually made them feel happier, more alert, etc), the feelings that may reinforce their tobacco  
16  
17 use and have associated these feelings with being around other smokers. In older smokers, most  
18  
19 of which showed low self-efficacy on being able to quit, the rationale for continuing to smoke  
20  
21 was different. For instance, for over 16% of smokers in this age group the disadvantages of  
22  
23 quitting were perceived to outweigh its advantages. Some reasons mentioned by older  
24  
25 participants were: the addiction of nicotine, being too late to quit, and that their body needed  
26  
27 nicotine. In other studies among mainstream populations, self-efficacy expectations and  
28  
29 advantages of smoking cessation appeared to be the most important associates of quitting  
30  
31 smoking among older smokers.[35,36] Therefore, this issue should be revisited in future studies  
32  
33 with ethno-cultural communities. The results of this study suggest that understanding health  
34  
35 beliefs and perceptions around smoking and improving self-efficacy are useful tools in  
36  
37 promoting smoking cessation among smokers in Chinese immigrant communities.  
38  
39  
40  
41  
42  
43  
44  
45  
46  
47  
48

### 49 **Limitations**

50  
51 Some limitations need to be considered. First, this study used a convenience sample, so it may  
52  
53 not reflect the actual smoking prevalence and patterns among Mandarin and Cantonese  
54  
55  
56

1  
2  
3 immigrants in the GVA. We could not explore the effect of acculturation on smoking habits and  
4  
5 patterns. There was no previous data on smoking patterns among Chinese immigrants in Canada,  
6  
7 and attempting a community based assessment would have been inherently difficult for an  
8  
9 exploratory study. Therefore the findings of this study cannot be generalized to larger Mandarin  
10  
11 and Cantonese speaking communities residing in the GVA. The goal was to explore the links to  
12  
13 smoking cessation among Mandarin and Cantonese populations in order to gain insight into the  
14  
15 need to adapt smoking cessation programs in these groups. In future research, a longitudinal  
16  
17 design in which our results can be tested is recommended. A second limitation is the fact that all  
18  
19 responses were by self-report and validation of smoking behaviors or reasons to quit or continue  
20  
21 smoking was not possible with a cross-sectional design. A third limitation is the absence of a  
22  
23 native mainstream (English-speaking) reference group, due to a lack of resources. This could be  
24  
25 a problem for interpreting the additional ‘culturally specific’ beliefs, because these were not  
26  
27 elicited from mainstream population group. Nevertheless, to assess whether the beliefs we  
28  
29 identified in this study are really ‘culturally specific’, a cohort study with all significant beliefs  
30  
31 for main ethnic groups in the GVA, including mainstream population, might be useful.  
32  
33  
34  
35  
36  
37  
38  
39  
40

## 41 CONCLUSIONS

42  
43 The results of our study suggest that an effective anti-smoking campaign in the Chinese  
44  
45 community should go beyond traditional English language efforts, utilize Chinese resources, and  
46  
47 build upon existing cultural attitudes (such as the belief that smoking is inappropriate for young  
48  
49 people) and knowledge (such as health risks) about smoking. Particular attention should be paid  
50  
51 to differences between female and male smokers and between younger and older smokers related  
52  
53 to their knowledge, beliefs and attitudes about smoking, and perceived barriers and facilitators to  
54  
55  
56

---

1  
2  
3 smoking cessation. We also identified different beliefs and perceptions about the harms and  
4  
5 benefits of smoking, based on language, age, and gender group. The findings indicate the  
6  
7 importance of addressing risk perceptions about the immediate and long-term consequences of  
8  
9 smoking. Therefore, future interventions can prove the applicability of a risk perception model  
10  
11 on smoking cessation among Mandarin and Cantonese speaking smokers. Despite finding  
12  
13 significant differences between the genders, educational level, ethnicity and age groups in our  
14  
15 study, we believe a larger sample size is needed to address this issue. The findings build a  
16  
17 window of opportunity to promote tailored cessation interventions incorporating cultural beliefs,  
18  
19 perceptions, and practices for Chinese immigrant communities.  
20  
21  
22  
23  
24  
25  
26

### 27 **Practical Implications**

28  
29 Our study identified the health beliefs and perceptions about smoking and its cessation among  
30  
31 Mandarin and Cantonese immigrants that could be considered by healthcare decision makers to  
32  
33 develop health promotion programs preventing smoking onset among younger population groups  
34  
35 in Chinese community. Interventions should take account of the specific profiles that Mandarin  
36  
37 and Cantonese immigrants in terms of knowledge, attitudes, beliefs and perceptions on their  
38  
39 smoking habits and patterns. Given the results of this study, we plan to conduct further research  
40  
41 to assess the applicability of a risk perception model to the smoking behavior of routine smokers  
42  
43 in the target immigrant communities. The model has been shown effective in terms of modifying  
44  
45 risk-taking behaviors, promoting positive perceptions, and improving self-efficacy that have  
46  
47 been applied for changing smoking habits/behavior .[37-39]  
48  
49  
50  
51  
52  
53  
54  
55  
56

## ACKNOWLEDGEMENTS

We would like to thank the community members, facilitators, ethno-cultural serving agencies (SUCCESS), and key-informants from the Mandarin and Cantonese communities in the Greater Vancouver Area who helped us with all aspects of this research.

## FUNDING

This project was funded by a community grant from The Vancouver Foundation, Vancouver, Canada.

## COMPETING INTERESTS

We declare that there is no conflict of interest in terms of ownership of shares, consultancy, speaker's honoraria or research grants from commercial companies or professional or governmental organizations with an interest in the topic of the paper (the ICMJE form for Disclosure of Potential Conflicts of Interest from the Corresponding Author is also attached to this submission).

## CONTRIBUTOR STATEMENT

JMF and IP planned the conception and study design. IP prepared the proposal draft to the funding agency and applied for the ethics approval. JS coordinated the study, recruited participants, and facilitated the community involvement. IP analyzed and interpreted the study data. IP and JS drafted the manuscript for important intellectual content.

## DATA SHARING STATEMENT

No additional data available.

1  
2  
3  
4  
5  
6  
7  
8  
9  
10  
11  
12  
13  
14  
15  
16  
17  
18  
19  
20  
21  
22  
23  
24  
25  
26  
27  
28  
29  
30  
31  
32  
33  
34  
35  
36  
37  
38  
39  
40  
41  
42  
43  
44  
45  
46  
47  
48  
49  
50  
51  
52  
53  
54  
55  
56  
57  
58  
59  
60  
**REFERENCE LIST**

1. Centers for Disease Control and Prevention. Tobacco Use. 2012. Available from:  
<http://www.cdc.gov/chronicdisease/resources/publications/aag/osh.htm> Accessed on June 20, 2014.
2. World Health Organization. Tobacco Free Initiative (TFI). 2014. Available from:  
[http://www.who.int/tobacco/health\\_priority/en/](http://www.who.int/tobacco/health_priority/en/) Accessed on June 18, 2014.
3. Haddad L, El-Shahawy O, Shishani K, et al. Cigarette use attitudes and effects of acculturation among Arab immigrants in USA: A preliminary study. *Health* 2012;4(10):785-793.
4. Robles GI, Singh-Franco D, & Ghin HL. A review of the efficacy of smoking-cessation pharmacotherapies in nonwhite populations. *Clin Ther* 2008;30(5):800-12.
5. Okuyemi K, Nollen N, & Ahluwalia J. Interventions to Facilitate Smoking Cessation. *Am Fam Physician* 2006;74(2):2620271.
6. Health Canada. Canadian Tobacco Use Monitoring Survey (CTUMS) 2010. 2010. Available at [http://www.hc-sc.gc.ca/hc-ps/tobac-tabac/research-recherche/stat/ctums-esutc\\_2010\\_graph-eng.php](http://www.hc-sc.gc.ca/hc-ps/tobac-tabac/research-recherche/stat/ctums-esutc_2010_graph-eng.php) Accessed on July 2, 2014.
7. Yan J, Xiao S, Ouyang D, et al. Smoking behavior, knowledge, attitudes and practice among health care providers in Changsha city, China. *Nicotine Tob Res* 2008; 10: 737-744.
8. Wu D, Ma GX, Zhou K, et al. The effect of a culturally tailored smoking cessation for Chinese American smokers. *Nicotine Tob Res* 2009;11(12):1448–1457.

- 1  
2  
3  
4  
5  
6  
7  
8  
9  
10  
11  
12  
13  
14  
15  
16  
17  
18  
19  
20  
21  
22  
23  
24  
25  
26  
27  
28  
29  
30  
31  
32  
33  
34  
35  
36  
37  
38  
39  
40  
41  
42  
43  
44  
45  
46  
47  
48  
49  
50  
51  
52  
53  
54  
55  
56
9. Chen W. *Susceptibility to Smoking among Chinese-Canadian Non-smoking Adolescents*. Doctoral Dissertation, University of British Columbia. 2008. Available at [https://circle.ubc.ca/bitstream/handle/2429/942/ubc\\_2008\\_fall\\_chen\\_weihong.pdf?sequence=1](https://circle.ubc.ca/bitstream/handle/2429/942/ubc_2008_fall_chen_weihong.pdf?sequence=1) Accessed on July 2, 2014.
  10. Yang G, Ma J, Liu N, et al. Smoking and passive smoking in Chinese - 2002. *Zhonghua Liu Xing Bing Xue Za Zhi* 2005;26:77-83.
  11. Ksal H, Sayg A, Sarıman N, et al. Evaluation of Clinical and Functional Parameters in Female Subjects With Biomass Smoke Exposure. *Respir Care* 2013;58(3):424–430.
  12. Statistics Canada. Some facts about the demographic and ethnocultural composition of the population. 2008. Available at <http://www.statcan.gc.ca/pub/91-003-x/2007001/4129904-eng.htm#2> Accessed on July 2, 2014.
  13. BC Statistics. Population Estimates - Total Populations. 2010. Available at: <http://www.bcstats.gov.bc.ca/data/pop/pop/estspop.asp#totpop> Accessed on July 2, 2014.
  14. Zeng XX, Chiu CH, Sun J, et al. A Phone-Counseling Smoking-Cessation Intervention for Male Chinese Restaurant Workers. *J Commun Health* 2010(3):1-12.
  15. Gallup World. Three in 10 Chinese Adults Smoke. 2012. Available at: <http://www.gallup.com/poll/152546/three-chinese-adults-smoke.aspx> Accessed on July 2, 2014.
  16. World Health Organization. Tobacco in China. Western Pacific Region. 2014. Available at: <http://www.wpro.who.int/china/mediacentre/factsheets/tobacco/en/> Accessed on June 20, 2014.
  17. Poureslami I, Doyle-Waters MMR, Nimmon L, et al. Hearing the community voice: methodological issues in developing asthma self-management educational materials for



1  
2  
3 immigrant communities. In Agyemang C, Airhihenbuwa CO, de-Graft Aikins A (eds.),  
4 *Ethnicity: Theories, International Perspectives and Challenges*. Hauppauge NY: Nova  
5  
6 Publishers 2014:125-156.  
7  
8

- 9  
10 **18.** Faridi Z, Grunbaum JA, Gray BS, et al. 2007. Community-based participatory research:  
11 necessary next steps. *Prev Chronic Dis*. Available at: <http://www.cdc.gov/pcd/>  
12 issues/2007/jul/06\_0182.htm Accessed on June 21, 2014.  
13  
14  
15 **19.** Israel BA, Schulz AJ, Parker EA, et al. Review of community-based research: assessing  
16 partnership approaches to improve public. *Annu.Rev.Public Health*.1998;19:173–202.  
17  
18 **20.** Poureslami I, Shum J, Cheng N, et al. Does Culture or Illness Change a Smoker’s  
19 Perspective on Cessation? *Am J Health Behav* 2014;38(5):33-39.  
20  
21 **21.** Poureslami I, Shum J, & FitzGerald JM. Differences in attitudes and beliefs about  
22 smoking among smoker and ex-smoker COPD patients. *J Health Care Poor* 2014 (Under  
23 review).  
24  
25 **22.** Poureslami I, Rootman I, Doyle-Water MMR, et al. Health literacy, language, and  
26 ethnicity-related factors in newcomer asthma patients to Canada: a qualitative study. *J*  
27 *Immigr Minor Health*.2011;13(2):315-322.  
28  
29 **23.** Klassen AF, Gulati S, Watt L, et al. Immigrant to Canada, newcomer to childhood  
30 cancer: a qualitative study of challenges faced by immigrant parents. *Psycho-oncol*  
31 2012;21(5):558-562.  
32  
33  
34 **24.** Scarinci IC, Silveira AF, Figueiredo dos Santos D, Beech BM. Sociocultural factors  
35 associated with cigarette smoking among women in Brazilian worksites: a qualitative  
36 study. *Health Promot. Int.* (2007) 22 (2): 146-154.  
37  
38  
39  
40  
41  
42  
43  
44  
45  
46  
47  
48  
49  
50  
51  
52  
53  
54  
55  
56

- 1  
2  
3  
4  
5  
6  
7  
8  
9  
10  
11  
12  
13  
14  
15  
16  
17  
18  
19  
20  
21  
22  
23  
24  
25  
26  
27  
28  
29  
30  
31  
32  
33  
34  
35  
36  
37  
38  
39  
40  
41  
42  
43  
44  
45  
46  
47  
48  
49  
50  
51  
52  
53  
54  
55  
56  
57  
58  
59  
60
25. Dawson AP, Cargo M, Stewart H, et al. Aboriginal Health Workers experience multilevel barriers to quitting smoking: a qualitative study. *Int J Equity Health* 2012;11: 27.
26. North American Quitline Consortium (NAQC). The Use of Quitlines among Priority Populations in the U.S.: Lessons from the Scientific Evidence. 2011. Available at: [http://c.ymcdn.com/sites/www.naquitline.org/resource/resmgr/Issue\\_Papers/IssuePaperTheUseofQuitlinesA.pdf](http://c.ymcdn.com/sites/www.naquitline.org/resource/resmgr/Issue_Papers/IssuePaperTheUseofQuitlinesA.pdf) Accessed on July 15, 2014.
27. Maryland Department of Health and Mental Hygiene. Exploring cultural, psychosocial, and environmental factors influencing tobacco use among Asian Americans, Hispanics, African Americans and American Indians in Maryland. Cigarette Restitution Fund's Tobacco Use Prevention and Cessation Program. 2008. Available at: [https://sph.umd.edu/epib/cultural\\_competency/Exploring%20cultural,%20psychosocial,%20and%20environmental%20factors%20influencing%20tobacco%20use%20among%20Asian%20Americans,%20Hispanics,%20African%20Americans%20and%20American%20Indians%20in%20Maryland.pdf](https://sph.umd.edu/epib/cultural_competency/Exploring%20cultural,%20psychosocial,%20and%20environmental%20factors%20influencing%20tobacco%20use%20among%20Asian%20Americans,%20Hispanics,%20African%20Americans%20and%20American%20Indians%20in%20Maryland.pdf) Accessed on July 15, 2014.
28. Binnal A, Rajesh G, Ahmed J, et al. Insights into Smoking and its Cessation among Current Smokers in India. *Asian Pacific J Cancer Prev.* 2013; 14 (5): 2811-2818.

- 1  
2  
3  
4  
5  
6  
7  
8  
9  
10  
11  
12  
13  
14  
15  
16  
17  
18  
19  
20  
21  
22  
23  
24  
25  
26  
27  
28  
29  
30  
31  
32  
33  
34  
35  
36  
37  
38  
39  
40  
41  
42  
43  
44  
45  
46  
47  
48  
49  
50  
51  
52  
53  
54  
55  
56  
57  
58  
59  
60
29. Yang J, Hammond D, Driezen P, et al. Health knowledge and perception of risks among Chinese smokers and non-smokers: Findings from the Wave 1 ITC China Survey. *Tob Control* 2010;19(Supplement 2):i18-i23.
30. Siahpush M, McNeill A, Hammond D, Fong GT. Socioeconomic and country variations in knowledge of health risks of tobacco smoking and toxic constituents of smoke: results from the 2002 International Tobacco Control (ITC) Four Country Survey. *Tobacco Control* 2006; 15(Suppl III):iii65–iii70. doi: 10.1136/tc.2005.013276.
31. Oncken C, McKee S, Krishnan-Sarin S, et al. Knowledge and perceived risk of smoking-related conditions: a survey of cigarette smokers. *Preventive Medicine*. 2005; 40: 779–784.
32. Roddy E, Antoniak M, Britton J, et al. Barriers and motivators to gaining access to smoking cessation services amongst deprived smokers – a qualitative study. *BMC Health Services Research* 2006;6:147-154.
33. Litmus research organization. Quitting Motivations and Barriers Qualitative Research. The Quit Group. 2005. Available at:  
<http://www.quit.org.nz/file/research/FINAL%20Litmus%20report-Quitting%20Motivations%20and%20Barriers.pdf> Accessed on July 15, 2014.

- 1  
2  
3  
4  
5  
6  
7  
8  
9  
10  
11  
12  
13  
14  
15  
16  
17  
18  
19  
20  
21  
22  
23  
24  
25  
26  
27  
28  
29  
30  
31  
32  
33  
34  
35  
36  
37  
38  
39  
40  
41  
42  
43  
44  
45  
46  
47  
48  
49  
50  
51  
52  
53  
54  
55  
56  
57  
58  
59  
60
- 34.** Richardson K. Smoking, Low Income and Health Inequalities: Thematic Discussion Document. Action on Smoking and Health and the Health Development Agency. 2001. Available at: [http://www.ash.org.uk/files/documents/ASH\\_86.pdf](http://www.ash.org.uk/files/documents/ASH_86.pdf) Accessed on July 15, 2014.
- 35.** Gwaltney CJ, Metrik J, Kahler CW, Shiffman S. Self-Efficacy and Smoking Cessation: A Meta-Analysis. *Psychol Addict Behav* 2009;23(1):1-20.
- 36.** Dijkstra A, & De Vries H. Self-efficacy expectations with regard to different tasks in smoking cessation. *Psychol Health* 2000;15(4):501-511.
- 37.** Song AV, Morrell HE, Cornell JL, et al. Perceptions of Smoking-Related Risks and Benefits as Predictors of Adolescent Smoking Initiation. *Am J Public Health* 2009;99(3):487-492.
- 38.** Aryal UR, Petzold M, & Krettek A. Perceived risks and benefits of cigarette smoking among Nepalese adolescents: a population-based cross-sectional study. *BMC Public Health* 2013,13:187-196.
- 39.** Harris JK, Karamelic-Muratovic A, Herbers SH, et al. Perceptions of Personal Risk About Smoking and Health Among Bosnian Refugees Living in The United States. *J Immigrant Minority Health* 2012;14(3):413-919.

1  
2  
3 **Title: Assessing beliefs and risk perceptions on smoking and smoking cessation in**  
4 **immigrant Chinese adult smokers residing in Vancouver, Canada: a cross-sectional study**  
5  
6  
7

8 **Corresponding author:**

9 Dr. J. Mark FitzGerald  
10 The Lung Centre, 7<sup>th</sup> Floor  
11 Gordon and Leslie Diamond Health Care Centre  
12 2775 Laurel Street  
13 Vancouver, BC, Canada  
14 V5Z 1M9  
15 Email: [mark.fitzgerald@vch.ca](mailto:mark.fitzgerald@vch.ca)  
16 Phone: 604-875-4122  
17  
18  
19  
20  
21

22 **Co-authors:**

23 Dr. Iraj Poureslami  
24 UBC, Faculty of Medicine, Respiratory Medicine Division  
25 Centre for Clinical Epidemiology and Evaluation (C2E2)  
26 Vancouver General Hospital – Research Pavilion  
27 716-828 West 10<sup>th</sup> Avenue  
28 Vancouver, BC, Canada  
29 V5Z 1M9  
30  
31  
32  
33  
34

35 Jessica Shum  
36 UBC, Faculty of Medicine, Respiratory Medicine Division  
37 Centre for Clinical Epidemiology and Evaluation (C2E2)  
38 Vancouver General Hospital – Research Pavilion  
39 828 West 10<sup>th</sup> Avenue  
40 Vancouver, BC, Canada  
41 V5Z 1M9  
42  
43  
44  
45  
46  
47

48 **Keywords:** smoking, Chinese communities, beliefs, risk perceptions, smoking cessation  
49

50 **Word count:** 4724

51 **Abstract:** 299  
52  
53  
54  
55  
56

**What this paper adds:**

1. Understanding the beliefs, perceptions, and practice of Chinese Mandarin and Cantonese communities about smoking and smoking cessation creates opportunities to tailor smoking cessation interventions according to the needs of these communities.
2. Previously, most studies have applied an identical risk perception model on smoking behavior assessments among young vs. old and male vs. female smokers. However, our study identified that risk perceptions about smoking and smoking consequences differ in the smoking population group based on their age and gender. Therefore, a different model of risk perception should be designed and applied considering the age and gender of participants.
3. Despite existing knowledge that Chinese communities are heterogeneous, our study found that smoking habits, perceptions, beliefs, and practices differ in Mandarin speaking compared to Cantonese speaking Chinese.

## ABSTRACT

**Objectives:** We aimed to conduct culturally based participatory research to assess cultural and belief contexts for smoking behaviours within Mandarin and Cantonese communities. Outcome variables were smoking-related knowledge, smoking patterns, attitudes and beliefs, and perceived barriers and facilitators to successful cessation.

**Design:** A community-based approach was applied involving smokers, community key-informants, and professionals in study design and implementation. Initially, focus groups were conducted and findings were used to develop study instrument. Participants responded once to study questionnaire after informed consent.

**Setting:** Community based in the Greater Vancouver Area, Canada.

**Participants:** 16 Chinese smokers participated in focus groups and subsequently, 167 current Chinese immigrant (137 males and 30 females) smokers from Mandarin and Cantonese communities, recruited with the help of community agencies and collaborating physicians, were enrolled in a cross-sectional study.

**Results:** We found that a majority believed smoking was harmful on their health. Younger smokers (<35 years of age) did not mind smoking in front of young children compared to older smokers ( $\geq 35$  years of age) ( $p < 0.001$ ). People with high school or lower levels of education believed that they would benefit more from smoking than suffering from withdrawal symptoms compared to better educated smokers ( $p < 0.05$ ). Mandarin smokers were significantly more likely to encourage others to quit than Cantonese smokers ( $p < 0.05$ ). Many indicated not receiving adequate support from care providers and lack of access to culturally and linguistically appropriate cessation programs impacted on their ability to quit smoking.

1  
2  
3 **Conclusions:** Our study highlighted the importance of tobacco beliefs and perceptions among  
4  
5 Mandarin and Cantonese speaking immigrants with limited access to healthcare information and  
6  
7  
8 for younger smokers whose attention to health consequences of smoking may be limited as well.  
9  
10  
11 Study participants were generally aware of the health risks and were willing to quit. Access to  
12  
13 appropriate cessation programs would fulfill their willingness.  
14  
15  
16  
17  
18  
19  
20  
21  
22  
23  
24  
25  
26  
27  
28  
29  
30  
31  
32  
33  
34  
35  
36  
37  
38  
39  
40  
41  
42  
43  
44  
45  
46  
47  
48  
49  
50  
51  
52  
53  
54  
55  
56  
57  
58  
59  
60

For peer review only



## Article Summary

### Strengths and Limitations of this study

- We undertook a community-based participatory approach, with community key-informants and healthcare providers being heavily involved in all aspects of the study such as design, instrument development, implementation, community outreach, and dissemination. These key-stakeholders are important allies in developing culturally and linguistically appropriate smoking cessation interventions.
- Our study provides evidence that attitudes and beliefs towards cigarette smoking differ between groups based on language, age, and gender. The differences with regards to tobacco smoking appear to be related to attitudes or knowledge.
- The results build a window of opportunity to promote tailored cessation interventions incorporating cultural beliefs, perceptions, and practices for Chinese immigrant communities.
- We used a convenience sampling method, which may not reflect the actual smoking prevalence and patterns of Chinese Mandarin and Cantonese immigrants in the Greater Vancouver Area.
- All responses were by self-report and validation of smoking behaviours or reasons to quit or continue smoking was not possible with a cross-sectional design.

## BACKGROUND

Tobacco use remains the leading cause of preventable morbidity and mortality in the world. [1-3]

In Canada, its use has been declining slower than expected in spite of increased taxation on cigarettes and more stringent tobacco policies put into place. [3] In order to accomplish the goal of reducing the rate of smokers among Canadian adults, smoking has to be addressed among all sub-populations, especially those with a higher smoking prevalence than the general population. Global studies have shown that those who stop smoking greatly reduce their risk of developing cardio pulmonary disease and that in general the longer the period of cessation, the greater is the reduction in risk.[4,5] Minority and immigrant communities in Canada may be at greater risk of smoking-related illnesses.[6] Reasons include lack of knowledge and awareness about the link between smoking and lung disease;[7] limited access to smoking cessation programs due to cultural, language, and systemic barriers; [8] and smoking behaviours.[9,10] In addition, many immigrants from low-and-middle-income countries have had prior significant exposure to biomass and bio-fuel as well as smoking which further increases their risk.[11] This is particularly true among immigrants from Mandarin and Cantonese speaking communities (the largest immigrant minority groups living in the BC and Canada)[12,13] where smoking rates remains high.[9,10] Such extensive tobacco use among immigrants may be due to the fact that smoking is a largely integrated into the Chinese male culture.[14] Nearly two of every three adult men in China are smokers.[15,16] It is, therefore, empirically relevant to try to understand this immigrant group's smoking knowledge, behaviours, and habits and develop culturally appropriate educational and counselling services to improve tobacco prevention attempts and promote cessation. Maximizing tobacco control for newcomers requires a special understanding of smoking pattern and beliefs of new immigrant populations. The objectives of this study were:

1  
2  
3 1) to explore smoking use patterns, smoking-related knowledge, beliefs and attitudes, and  
4  
5 perceived barriers and facilitators to smoking cessation among Mandarin and Cantonese  
6  
7 speaking communities living in the Greater Vancouver Area (GVA), and 2) to assess the  
8  
9 effectiveness of socio-cultural and environmental factors which influenced the onset of smoking  
10  
11 and smoking habits (continued smoking) among the study participants. We were also interested  
12  
13 to identify differences in above mentioned variables between males and females, Mandarin and  
14  
15 Cantonese, and between age and education level groups. The identification of tobacco use and  
16  
17 other related patterns may help facilitate the development of community-based culturally  
18  
19 appropriate interventions targeting tobacco use and would be helpful for future research for  
20  
21 Chinese immigrants in future research.  
22  
23  
24  
25  
26  
27  
28

## 29 **METHODS**

### 30 **Project Design**

31  
32 This multi-stage cross-sectional study employed both qualitative and quantitative components  
33  
34 within an over-arching community-based participatory framework. The first stage comprised the  
35  
36 development and testing of a measurement instrument for the survey study. The second stage  
37  
38 was a quantitative study assessing the outcome variables including smokers' awareness of  
39  
40 smoking and its cessation, attitudes and beliefs about smoking harms and benefits, and cultural  
41  
42 norms of smoking in their community.  
43  
44  
45  
46  
47

48 The study was conducted between January 2013 and June 2014, allowing for participation and  
49  
50 collaboration between members of the Mandarin and Cantonese communities and other key-  
51  
52 stakeholders such as professionals and researchers in the research process.[17-19] Connections  
53  
54 and networking were built with community key-informants and community agencies (e.g.,  
55  
56

1  
2  
3 SUCCESS (United Chinese Community Enrichment Services Society), Vancouver Coastal  
4 Health community organizations, etc.) supporting active involvement and contribution in study  
5 design, development and implementation. Community collaborators provided assistance with  
6 recruitment of Mandarin and Cantonese smokers as well as input and suggestions on the  
7 development of focus group and interview questions. They recruited two males and two females  
8 who were members of the community, fluent in Mandarin and Cantonese, to work in alliance  
9 with 4 female bilingual Chinese research assistants. All community facilitators and research  
10 assistants received appropriate training prior the study. The training included approaches on how  
11 to best recruit study participants, understanding of the project's goals and objectives, how to  
12 conduct focus groups and individual interviews with smokers from their own communities, and  
13 ideas on how the team could work together effectively in collection of the best information  
14 possible on Chinese smokers' knowledge, beliefs and attitudes about harms and benefits of  
15 smoking, and socio-cultural and environmental factors affecting smoking and smoking cessation.  
16 The community researchers transcribed and translated focus group and interview discussions and  
17 we applied the collected information in the development of a study measurement tool and  
18 conceptual framework. In addition, findings from our previous qualitative smoking study  
19 (conducted with smokers from the same communities) were used in the development of the study  
20 design and measurement tool. [20]  
21  
22  
23  
24  
25  
26  
27  
28  
29  
30  
31  
32  
33  
34  
35  
36  
37  
38  
39  
40  
41  
42  
43  
44  
45  
46  
47

## 48 **Ethics**

49 Ethics approval was obtained for this study from the University of British Columbia Research  
50 Ethics Board. All participants signed a written consent form in their preferred written language  
51 (Chinese Simplified, Chinese Traditional, or English) translated by the bilingual researchers who  
52  
53  
54  
55  
56

---

1  
2  
3 clearly explained the study rationale, goals and objectives, and how their involvement would be  
4  
5 like prior to the study.  
6  
7  
8  
9

### 10 **Study Measurement Tool**

11  
12 We initially developed the study measurement tool by determining whether any English or  
13  
14 Chinese language questionnaires were currently in use to assess attitudes and beliefs re smoking  
15  
16 in the Chinese community. A literature search and an informal survey of immigrant-serving  
17  
18 community agencies did not find any such instrument **that has been developed in Canadian**  
19  
20 **Chinese context**. Given the absence of a validated assessment questionnaire in the target  
21  
22 languages **for Canadian Chinese**, a new measurement tool was developed over a 4-month period.  
23  
24  
25 Development of the study measurement tool began with information collected from initial focus  
26  
27 group session participants (n=14) and individual interviews (n=2), review of relevant literature  
28  
29 that addressed knowledge of, attitudes to, and behaviors in relation to tobacco use, and also our  
30  
31 previous smoking-related qualitative studies with Mandarin and Cantonese current and ex-  
32  
33 smokers.[20,21] Moreover, a professional measurement tool developer (a PhD in the socio-  
34  
35 psychology research and evaluation field from University of British Columbia) with expertise in  
36  
37 developing mixed open-ended and closed-format questionnaires was involved in the face and  
38  
39 content validation and finalization of the measurement tool. The team and the measurement  
40  
41 developer have the expertise to identify and differentiate between beliefs, attitudes and  
42  
43 perceptions, as well as the socio-cultural and environmental aspects of smoking and its cessation.  
44  
45  
46 Each set of variables were identified and separated by heading-title in the questionnaire. The  
47  
48 internal consistency of the data was checked by test-retesting reliability, where the study  
49  
50 questionnaire was administered to 5 smokers and tested again a week after and the results of the  
51  
52  
53  
54  
55  
56  
57

1  
2  
3 initial assessment and retest were compared. Also, more advanced process was applied by  
4  
5 calculating Cronbach Alpha and a coefficient was (.89).  
6  
7

8 The final questionnaire covered current smoking knowledge, beliefs and attitudes about smoking  
9  
10 and its cessation, and socio-cultural and environmental factors that promote or prevent smoking  
11  
12 onset and continuation. The tool included 70 questions covering demographics and concepts on  
13  
14 smoking onset, smoking characteristics, perceptions, experience in quitting, social relationships,  
15  
16 and cultural and environmental influences and were in the format of yes/no, true/false, multiple  
17  
18 choice, and open-ended questions (The study measurement tool can be found as Supplementary  
19  
20 File 1). The questionnaire was also reviewed by a number of key-informants and health  
21  
22 practitioners (n=9) from the target communities who provided feedback and comments re the  
23  
24 questionnaire and checked its face and content validity. The bilingual Chinese research assistants  
25  
26 worked collaboratively together translating the study measurement tool to Chinese Simplified  
27  
28 and Traditional formats. The translations were reviewed by secondary (back-up) translators from  
29  
30 the target communities who were introduced by the collaborating immigrant agencies for  
31  
32 accuracy and correctness. The tool was then reviewed by the community key-informants and  
33  
34 professionals for further crosschecking. Finally we pilot tested the questionnaire with selected  
35  
36 smokers and ex-smokers from the Chinese communities (n=5) to confirm validation of the  
37  
38 measurement tool and for cultural relevance and clarification, as well as translation purposes  
39  
40 including understandability, acceptability, and applicability. Suggestions were integrated into a  
41  
42 revised version.  
43  
44  
45  
46  
47  
48  
49

### 50 **Participant Recruitment**

51 Eligibility criteria for participants were adults ( $\geq 21$  years old) who were current smokers  
52  
53 (defined by having smoked at least 5 cigarettes per day during the past 30 days), Chinese descent  
54  
55  
56

1  
2  
3 (either Mandarin or Cantonese speaking) and be immigrants to Canada or children of Chinese  
4 immigrants. Participants were recruited from within the communities using a variety of outreach  
5 methods such as posting flyers and referral applied from previous studies and through network  
6 with community agency collaborators. [17,22,23] In total, 16 Chinese smokers participated in  
7 initial focus groups and interviews and subsequently 167 (137 males and 30 females) were  
8 interviewed, from which 93 were Mandarin speaking and 73 were Cantonese speaking. In terms  
9 of age category, 90 participants were <35 years of age and 76 were ≥35 years of age. Our  
10 intended sample size was 150 Chinese smokers aiming to identify mean differences in  
11 knowledge, beliefs, attitudes, and practices related to smoking and experience in smoking  
12 cessation between age, gender, education, and ethnicity groups.  
13  
14  
15  
16  
17  
18  
19  
20  
21  
22  
23  
24  
25  
26  
27  
28

### 29 **Data Collection**

30 Data was collected through administration of study questionnaire via individual interviews.  
31 Interview sessions were conducted at places and times of convenience for participants: e.g.,  
32 participants' homes, community centers, and our research centre. Printed consent forms were  
33 explained and signed preceding the interview. Modest honoraria were paid to cover time, travel,  
34 and parking expenses. Community research assistants conducted the interviews in Mandarin or  
35 Cantonese and the participants filled in a self reported Chinese Simplified and Chinese  
36 Traditional questionnaire while the research assistants were available to answer any questions  
37 that they would have had, or ask the responders to elaborate the given information in the open-  
38 ended questions. Each interview was conducted by two interviewers: one with an academic  
39 perspective (a research assistant), and one from community who acted as a facilitator. The two  
40 interviewers took notes during interviews including verbal and non-verbal communication by the  
41  
42  
43  
44  
45  
46  
47  
48  
49  
50  
51  
52  
53  
54  
55  
56  
57

---

1  
2  
3 participants and reviewed their notes at the end of each interview aiming to improve the accuracy  
4  
5 of the information, capturing smokers' smoking beliefs, perceptions, and also their comments  
6  
7 about cultural images of smoking and its cessation. In some instances (e.g., old smokers or low  
8  
9 literate people), the research assistants assisted by administered the study questionnaire verbally  
10  
11 while taking notes throughout the entire interview.  
12  
13

### 14 15 16 17 18 **Data analysis**

19  
20 SPSS v20 (2012) was used for all statistical tests. Descriptive statistical tests were used and the  
21  
22 results were presented in tables and graphs. Relevant inferential statistics were calculated for the  
23  
24 entire sample and stratified according to age, gender, level of education, language of origin, and  
25  
26 smoking practices. The data were not normally distributed, and non-parametric tests were  
27  
28 therefore used; e.g., chi-square test for nominal data, Mann–Whitney test for ordinal data with  
29  
30 two groups, and Kruskal–Wallis test for more than two groups with ordinal data. Binary logistic  
31  
32 regression was used to determine the effects of demographics on the outcome variables. All data  
33  
34 were examined regarding distributions and trends in the data, and the level of significance was  
35  
36 set at the  $P < 0.05$  level.  
37  
38  
39  
40  
41  
42

### 43 44 **Sample Size Calculation**

45  
46 With a total sample size of 167 subjects for the cross-sectional study, we estimated that we could  
47  
48 identify mean differences between different age, gender, language and education level groups  
49  
50 and with an effect size of 0.45 with 80% statistical power and a two-sided significance level of  
51  
52  $P < 0.05$ .  
53  
54  
55  
56



## FINDINGS

Between May 2013 and April 2014, we recruited and enrolled 167 current smokers. **Table 1** describes characteristics of the study sample for both Mandarin (55.7%, n=93) and Cantonese (44.3%, n=74). The participants included predominately males (82%, n=137). The median age was 35 and we used this cut off point for younger/older groups, as used previously from our qualitative studies conducted with Chinese community smokers, [20] allowing us to identify these differences in perspective.

**Table 1. Participant characteristics**

|                             | N   | %    |
|-----------------------------|-----|------|
| <b>Gender</b>               |     |      |
| Male                        | 137 | 82   |
| Female                      | 30  | 18   |
| <b>Language</b>             |     |      |
| Mandarin                    | 93  | 55.7 |
| Cantonese                   | 74  | 44.3 |
| <b>Age</b>                  |     |      |
| <35                         | 105 | 63   |
| ≥35                         | 62  | 37   |
| <b>Education Level</b>      |     |      |
| High school and below       | 87  | 52   |
| University degree and above | 80  | 48   |

### Smoking-related knowledge and reasons for starting smoking

Knowledge of smoking consequences is an important factor to consider when designing smoking cessation programs or implementing health promotion interventions, especially to prevent onset of smoking among young people.[2,8] Almost an equal number (23%) of Mandarin and Cantonese smokers indicated that they were not aware of smoking side effects when they started smoking. **Table 2 provides the breakdown of smoking-related knowledge by gender, age,**

language, and education level. As shown on table 2, knowledge about side effects of smoking was mixed among the participants of this study, with no statistically significant differences observed between the language, gender, age, and education groups in this regard.

**Table 2.** ‘At the time you started smoking, did you know the side effects of smoking?’

|                             | Yes |    | No |    |
|-----------------------------|-----|----|----|----|
|                             | N   | %  | N  | %  |
| <b>Gender</b>               |     |    |    |    |
| Male                        | 105 | 77 | 32 | 23 |
| Female                      | 22  | 73 | 8  | 27 |
| <b>Age</b>                  |     |    |    |    |
| <35                         | 90  | 86 | 15 | 14 |
| ≥35                         | 38  | 62 | 24 | 39 |
| <b>Language</b>             |     |    |    |    |
| Mandarin                    | 72  | 77 | 21 | 23 |
| Cantonese                   | 56  | 76 | 18 | 24 |
| <b>Education Level</b>      |     |    |    |    |
| High school under           | 61  | 70 | 26 | 30 |
| University degree and above | 67  | 84 | 13 | 16 |

We also aimed to determine the *socio-cultural and environmental* factors which influenced the onset of smoking among the study participants.[24] In this study, we defined social factors as smoking during the gatherings, being offered cigarettes by peers (a cultural norm in this community), smoking to feel being accepted, etc. On average for 45% (n=75) of participants, ‘social factors’ were a trigger to start smoking, while it was the number one trigger for male smokers and smokers with who were 35 years or over with an equal rate of 53%. Although 50% of females mentioned ‘emotional factors’ as a contributor to starting smoking, only 22% (on average) of males cited these as factors for them. Likewise, ‘environmental factors’ were considered by only 20% of participants as a factor in starting to smoke, while 50% of Mandarin smokers mentioned environmental factors as a major trigger for them to start smoking. A smoking friend was mentioned by most of participants (66.3%) as someone in their social

network when starting smoking, compared to classmate (48.5%), family (29%), and work-related colleagues (28%). An interesting observation was that 50% of female smokers in the study identified having a family member who smoked when they first started smoking.

### Smoking beliefs, perceptions, and attitudes

Multiple factors affected participants to become regular smokers. For instance, for around 62% of smokers (between 100 to 104), the main reasons to smoke regularly were the beliefs that smoking 'relaxed them' and 'helped them feel less stress' as well as when 'they were having a break' or when 'they were bored'. The breakdown of the triggers to smoke based on smokers' gender, age, language, and education groups are shown on Table 3, with no statistically significant differences observed between the male and female smokers, and different age, language, and education groups in this regard.

**Table 3.** 'Reasons for becoming regular smokers'

|                             | Relaxation |    | Less stress |    | Having break |    | Being bored |    |
|-----------------------------|------------|----|-------------|----|--------------|----|-------------|----|
|                             | N          | %  | N           | %  | N            | %  | N           | %  |
| <b>Gender</b>               |            |    |             |    |              |    |             |    |
| Female                      | 22         | 73 | 14          | 47 | 17           | 57 | 16          | 53 |
| Male                        | 82         | 60 | 81          | 59 | 83           | 61 | 84          | 61 |
| <b>Age</b>                  |            |    |             |    |              |    |             |    |
| <35                         | 73         | 70 | 62          | 59 | 69           | 66 | 68          | 65 |
| ≥35                         | 31         | 51 | 33          | 53 | 31           | 50 | 34          | 55 |
| <b>Language</b>             |            |    |             |    |              |    |             |    |
| Mandarin                    | 50         | 54 | 57          | 61 | 53           | 57 | 54          | 58 |
| Cantonese                   | 40         | 54 | 38          | 51 | 47           | 64 | 48          | 65 |
| <b>Education Level</b>      |            |    |             |    |              |    |             |    |
| High school under           | 51         | 59 | 45          | 52 | 52           | 60 | 55          | 63 |
| University degree and above | 53         | 66 | 50          | 62 | 48           | 60 | 47          | 59 |

We were also interested to identify the *social and cultural* aspects of smoking habits (continued smoking). When asked the question of whether 'most people in my culture smoke' to assess

1  
2  
3 participants' perceived commonality of smoking in their communities, there was a significant  
4  
5 difference between male and female participants ( $\chi^2 = 5.424$ ,  $df = 1$ ,  $P < 0.05$ ) ; more males  
6  
7 (n=46, 34%) believed that smoking was a cultural habit in their community than females (n=17,  
8  
9 57%) did. Similar findings were observed between Mandarin and Cantonese ( $\chi^2 = 5.182$ ,  $df = 1$ ,  
10  
11  $P < 0.05$ ); more Mandarin (n=65) answered yes to the question than Cantonese smokers (n=39).  
12  
13 Many participants (61%) indicated they normally smoked when they were 'with friends'; with  
14  
15 the highest proportion reported among the <35 years old participants (82%) and male  
16  
17 participants (70%). Remarkably, 70% of the <35 years old participants indicated they smoked  
18  
19 when they had alcohol. The rate was 60% among female participants, 57% among males, and  
20  
21 57% among both Mandarin and Cantonese smokers. In terms of attitudes towards exposing  
22  
23 others to second or third-hand smoke, we asked participants '*do you mind smoking in front of*  
24  
25 *non-smokers*'? Younger smokers (<35 years of age) were more likely (n=72) to mention that  
26  
27 they did not mind smoking in front of non-smokers compared to older smokers ( $\geq 35$  years of  
28  
29 age) (n=52). The mean difference was significant ( $\chi^2 = 7.133$ ,  $df = 1$ ,  $P < 0.01$ ). Also, when the  
30  
31 participants were asked whether they minded smoking in front of young children, similarly, more  
32  
33 younger smokers (<35 years of age) (n=97) mentioned that they '*did not mind smoking in front*  
34  
35 *of young children*' than the older smokers (n=55) and the difference was significant ( $\chi^2 = 5.123$ ,  
36  
37  $df = 1$ ,  $P < 0.05$ ). We also aimed to assess smokers' viewpoints regarding second hand smoking  
38  
39 and its harm. We asked whether '*second and third hand smoke was as harmful as first hand*  
40  
41 *smoke*', again, relatively more males said 'no' when compared to female smokers (n= 40 and n=  
42  
43 10, respectively) and the difference was significant ( $\chi^2 = 4.736$ ,  $df = 1$ ,  $P < 0.05$ ). Finally, we  
44  
45 assessed smokers' beliefs about their own smoking pattern with a self-reported question of '*I*  
46  
47 *have a smoking routine/pattern*'. No significant differences were identified between gender, age,  
48  
49  
50  
51  
52  
53  
54  
55  
56  
57

1  
2  
3 and language groups. However, we found that more people with high school education or less  
4 mentioned they didn't have a routine/pattern (n=30) compared to people with higher education  
5 (n=12) and the difference was significant ( $\chi^2 = 7.156$ ,  $df = 1$ ,  $P < 0.01$ ).  
6  
7  
8  
9

### 10 11 12 13 **Perceptions about smoking**

14  
15 We assessed smokers' perceived *enjoyable feeling* that they may have due to smoking by asking  
16 whether '*there is a different feeling when comparing times I smoke and don't smoke*' and found a  
17 statistically significant difference between male and female participants ( $\chi^2 = 4.237$ ;  $df = 1$ ,  
18  $P < 0.05$ ). Significantly more males (n=47) mentioned experiencing a different feeling when they  
19 smoked compared to not smoking than female smokers (n=15). In addition, younger smokers  
20 (<35 years of age) as well claimed to have a different feeling when comparing times smoking  
21 and not smoking (n=46) compared to older smokers (n=16), and the differences were statistically  
22 significant ( $\chi^2 = 3.889$ ,  $df = 1$ ,  $P < 0.05$ ). Likewise, more Mandarin smokers (n=41) than  
23 Cantonese smokers (n=20) reported having a different feeling when they smoke compared to  
24 when they were not smoking ( $\chi^2 = 5.188$ ,  $df = 1$ ,  $P < 0.05$ ). For this outcome there was no  
25 significant differences between highly educated (college/university and above) and lower  
26 educated (high school or lower).  
27  
28  
29  
30  
31  
32  
33  
34  
35  
36  
37  
38  
39  
40  
41  
42

43 Additionally, we assessed smokers' perceptions about *helpfulness* of smoking to alleviate their  
44 anxiety and stress. We noticed that 77% of female smokers, 69% of younger smokers (aged 34  
45 years or younger), and 52% of older smokers (age 35 or older) smoked to reduce their sense of  
46 helpfulness. Male smokers perceived that smoking helped them to minimize the feeling of being  
47 bored (80%) and made them more connected to their group of friends (69%).  
48  
49  
50  
51  
52  
53  
54  
55  
56  
57

## Smoking cessation

We aimed to identify willingness to quit smoking and *perceived barriers and facilitators* to cessation. The majority of participants, in particular young male and female smokers, mentioned their desire to quit and attempted to several times, before giving up and smoking again. A few people mentioned using medications or seeking professional advice to quit smoking but mainly relied on their own willpower to quit. Also, older participants indicated trying to quit due to health related issues such as heart disease or cancer. We were also interested to find out whether participants were under pressure by someone close to them to quit smoking. When asked '*I was nagged by someone to quit smoking*', no statistically significant differences were identified in different gender, age, language, and education groups. However, when we asked whether they '*would encourage others to quit*', more Mandarin speaking smokers answered yes to (n=45) than Cantonese speaking smokers (n=23) ( $\chi^2 = 5.172$ , df = 1,  $P < 0.05$ ). No significant differences were identified based on age, gender, and level of education. In addition, most participants (87%) said "No" to the question: "*Would you encourage non-smokers to smoke?*" Furthermore, we also asked whether living in a smoking restricted society like Canada would encourage smokers to quit or cut down on their smoking. More Mandarin speaking smokers (n=56, 60%) mentioned that '*living in Canada influenced their smoking habits or desire to quit*', compared to Cantonese speaking smokers (n=30, 41%) ( $\chi^2 = 6.424$ , df = 1,  $P = 0.011$ ).

More people with high school or lower education (n=34) agreed with the statement '*I would benefit more from smoking than suffering from withdrawal symptoms due to quitting*', compared to the more educated smokers (n=12) ( $\chi^2 = 6.102$ , df = 1,  $P < 0.05$ ). When asked whether they '*tried nicotine replacement therapy to quit smoking*', more Mandarin speaking smokers (n=32)

mentioned that they had tried this aid to quit smoking compared to Cantonese speaking smokers (n=12 ( $\chi^2 = 7.275$ , df = 1,  $P = 0.007$ ).

In general, participants identified language and literacy issues as barriers to accessing smoking cessation information as well as lack of useful information in a social media format. For instance, older participants mentioned that they had limited exposure to public sources of information on cessation services that were developed in their native language. A small minority of these smokers had received advice and information about the health issues attributed to smoking from their physicians. Younger smokers mentioned the lack of disseminating smoking cessation messages through social media such as text messaging to promote quitting services in their native language.

Our synthesis of the interview data identified seven barriers to the participants' cessation which are summarized in Table 4.

**Table 4.** *Barriers to Smoking Cessation identified by the participants*

| Barriers                                                                                                 |
|----------------------------------------------------------------------------------------------------------|
| (a) the problems of managing their lives in a highly stressful environment                               |
| (b) their isolation and the limited support systems in their community or work/school environments       |
| (c) the availability of smoking as a social-connection to their peers and limited resources for pleasure |
| (d) perceived minimal health risks of smoking, (e) the commonality of smoking in their community         |

- (e) the commonality of smoking in their community
- (f) the scarce or non-existent information about how to stop smoking
- (g) the belief that all they can quit on their own whenever they decide to

## DISCUSSION

The main goal of this study was to gain insights on the beliefs and perceptions associated with smoking behaviors and smoking cessation among Chinese Cantonese and Mandarin speaking current smokers, taking into account culturally specific knowledge and practices. The results have implications for the development of appropriate smoking cessation programs and educational interventions to prevent and control tobacco-related health issues among the target communities. Such interventions may have policy implications in health promotion programs to prevent smoking onset among younger population groups in the immigrant communities.

Several participants in this study indicated their desire to quit and attempted to do so many times, many of whom did it relying on their own willpower. Only a few, mainly among older smokers, tried to quit because of health related issues. They mentioned that a better communication with primary care providers and ease of access to culturally and linguistically appropriate smoking cessation resources would promote smoking cessation in their communities. Similar findings have been reported in studies done in other countries as well as among many immigrant communities in Canada who tried to quit smoking.[25-28] In addition to elucidating these barriers to smoking cessation and despite continued smoking, participants showed being knowledgeable in health related and other negative aspects of smoking as on average, 70% of the participants indicated they were aware of the health consequences of smoking. This finding has



1  
2  
3 been confirmed in other studies. [28] In our study, we found that higher education, better  
4  
5 knowledge, and smoking regulations contributed to having a greater intent to quit smoking. For  
6  
7 instance, we found that most participants were not ignorant of the dangers of smoking, with the  
8  
9 vast majority recognizing that smoking posed risks to their own health and the health of those  
10  
11 around them. This knowledge is much higher than that of Chinese smokers who were previously  
12  
13 surveyed in China, where only 36% of participants believed smoking can cause lung cancer and  
14  
15 only 4% were aware of the relationship of smoking to heart disease.[29] In addition, many of the  
16  
17 smokers in our study already accepted limitations on the use of cigarettes in Canada, and many,  
18  
19 mostly younger smokers, supported restrictions on indoor smoking and also mentioned not  
20  
21 smoking at home or where children are present. This could be attributed to the smoking  
22  
23 restriction rules as well as the strong anti-smoking educational campaigns in Canada. For  
24  
25 example, since 2001, Health Canada has spent more than \$480 million for a 5-year program to  
26  
27 encourage tobacco cessation programs for all Canadians.[30] These regulations might be  
28  
29 important to reduce the risk of second-hand and third-hand smoking and related health issues  
30  
31 among young children and other non-smoker family members.  
32  
33  
34  
35  
36  
37  
38  
39

40 In terms of reasons to continue smoking, perceived advantages of smoking such as ‘smoking  
41  
42 does make me feel more comfortable’ and ‘smoking helps me to be stress-free when I have  
43  
44 problems’ appeared to be more important factors to promote smoking continuation among our  
45  
46 study participants than perceived disadvantages around ‘health issues’ and ‘money’ which shown  
47  
48 to be strong motivators in quitting smoking in some studies. Some studies found that smokers  
49  
50 may not be aware of the diseases caused by smoking and therefore, they may perceive  
51  
52 themselves less susceptible to the risks of smoking.[30-34] For instance, health consequences  
53  
54  
55  
56

1  
2  
3 and costs of smoking were not perceived as strong motivators to quit smoking among young  
4  
5 participants. They reported the stimulating and anti-stress effects of smoking (smoking may  
6  
7 actually made them feel happier, more alert, etc), the feelings that may reinforce their tobacco  
8  
9 use and have associated these feelings with being around other smokers. In older smokers, most  
10  
11 of which showed low self-efficacy on being able to quit, the rationale for continuing to smoke  
12  
13 was different. For instance, for over 16% of smokers in this age group the disadvantages of  
14  
15 quitting were perceived to outweigh its advantages. Some reasons mentioned by older  
16  
17 participants were: the addiction of nicotine, being too late to quit, and that their body needed  
18  
19 nicotine. In other studies among mainstream populations, self-efficacy expectations and  
20  
21 advantages of smoking cessation appeared to be the most important associates of quitting  
22  
23 smoking among older smokers.[35,36] Therefore, this issue should be revisited in future studies  
24  
25 with ethno-cultural communities. The results of this study suggest that understanding health  
26  
27 beliefs and perceptions around smoking and improving self-efficacy are useful tools in  
28  
29 promoting smoking cessation among smokers in Chinese immigrant communities.  
30  
31  
32  
33  
34  
35  
36  
37  
38  
39

### 40 **Limitations**

41  
42 Some limitations need to be considered. First, this study used a convenience sample, so it may  
43  
44 not reflect the actual smoking prevalence and patterns among Mandarin and Cantonese  
45  
46 immigrants in the GVA. We could not explore the effect of acculturation on smoking habits and  
47  
48 patterns. There was no previous data on smoking patterns among Chinese immigrants in Canada,  
49  
50 and attempting a community based assessment would have been inherently difficult for an  
51  
52 exploratory study. Therefore the findings of this study cannot be generalized to larger Mandarin  
53  
54  
55  
56

1  
2  
3 and Cantonese speaking communities residing in the GVA. The goal was to explore the links to  
4 smoking cessation among Mandarin and Cantonese populations in order to gain insight into the  
5 need to adapt smoking cessation programs in these groups. In future research, a longitudinal  
6 design in which our results can be tested is recommended. A second limitation is the fact that all  
7 responses were by self-report and validation of smoking behaviors or reasons to quit or continue  
8 smoking was not possible with a cross-sectional design. A third limitation is the absence of a  
9 native mainstream (English-speaking) reference group, due to a lack of resources. This could be  
10 a problem for interpreting the additional ‘culturally specific’ beliefs, because these were not  
11 elicited from mainstream population group. Nevertheless, to assess whether the beliefs we  
12 identified in this study are really ‘culturally specific’, a cohort study with all significant beliefs  
13 for main ethnic groups in the GVA, including mainstream population, might be useful.  
14  
15  
16  
17  
18  
19  
20  
21  
22  
23  
24  
25  
26  
27  
28  
29  
30  
31

## 32 CONCLUSIONS

33  
34 The results of our study suggest that an effective anti-smoking campaign in the Chinese  
35 community should go beyond traditional English language efforts, utilize Chinese resources, and  
36 build upon existing cultural attitudes (such as the belief that smoking is inappropriate for young  
37 people) and knowledge (such as health risks) about smoking. Particular attention should be paid  
38 to differences between female and male smokers and between younger and older smokers related  
39 to their knowledge, beliefs and attitudes about smoking, and perceived barriers and facilitators to  
40 smoking cessation. We also identified different beliefs and perceptions about the harms and  
41 benefits of smoking, based on language, age, and gender group. The findings indicate the  
42 importance of addressing risk perceptions about the immediate and long-term consequences of  
43 smoking. Therefore, future interventions can prove the applicability of a risk perception model  
44  
45  
46  
47  
48  
49  
50  
51  
52  
53  
54  
55  
56  
57

1  
2  
3 on smoking cessation among Mandarin and Cantonese speaking smokers. Despite finding  
4  
5 significant differences between the genders, educational level, ethnicity and age groups in our  
6  
7 study, we believe a larger sample size is needed to address this issue. The findings build a  
8  
9 window of opportunity to promote tailored cessation interventions incorporating cultural beliefs,  
10  
11 perceptions, and practices for Chinese immigrant communities.  
12  
13

### 14 15 16 17 18 **Practical Implications**

19  
20 Our study identified the health beliefs and perceptions about smoking and its cessation among  
21  
22 Mandarin and Cantonese immigrants that could be considered by healthcare decision makers to  
23  
24 develop health promotion programs preventing smoking onset among younger population groups  
25  
26 in Chinese community. Interventions should take account of the specific profiles that Mandarin  
27  
28 and Cantonese immigrants in terms of knowledge, attitudes, beliefs and perceptions on their  
29  
30 smoking habits and patterns. Given the results of this study, we plan to conduct further research  
31  
32 to assess the applicability of a risk perception model to the smoking behavior of routine smokers  
33  
34 in the target immigrant communities. The model has been shown effective in terms of modifying  
35  
36 risk-taking behaviors, promoting positive perceptions, and improving self-efficacy that have  
37  
38 been applied for changing smoking habits/behavior .[37-39]  
39  
40  
41  
42  
43  
44  
45  
46  
47  
48  
49  
50  
51  
52  
53  
54  
55  
56  
57

## ACKNOWLEDGEMENTS

We would like to thank the community members, facilitators, ethno-cultural serving agencies (SUCCESS), and key-informants from the Mandarin and Cantonese communities in the Greater Vancouver Area who helped us with all aspects of this research.

## FUNDING

This project was funded by a community grant from The Vancouver Foundation, Vancouver, Canada.

## COMPETING INTERESTS

We declare that there is no conflict of interest in terms of ownership of shares, consultancy, speaker's honoraria or research grants from commercial companies or professional or governmental organizations with an interest in the topic of the paper (the ICMJE form for Disclosure of Potential Conflicts of Interest from the Corresponding Author is also attached to this submission).

## CONTRIBUTOR STATEMENT

JMF and IP planned the conception and study design. IP prepared the proposal draft to the funding agency and applied for the ethics approval. JS coordinated the study, recruited participants, and facilitated the community involvement. IP analyzed and interpreted the study data. IP and JS drafted the manuscript for important intellectual content.

## DATA SHARING STATEMENT

No additional data available.

1  
2  
3  
4  
5  
6  
7  
8  
9  
10  
11  
12  
13  
14  
15  
16  
17  
18  
19  
20  
21  
22  
23  
24  
25  
26  
27  
28  
29  
30  
31  
32  
33  
34  
35  
36  
37  
38  
39  
40  
41  
42  
43  
44  
45  
46  
47  
48  
49  
50  
51  
52  
53  
54  
55  
56  
57  
58  
59  
60  
**REFERENCE LIST**

1. Centers for Disease Control and Prevention. Tobacco Use. 2012. Available from:  
<http://www.cdc.gov/chronicdisease/resources/publications/aag/osh.htm> Accessed on June 20, 2014.
2. World Health Organization. Tobacco Free Initiative (TFI). 2014. Available from:  
[http://www.who.int/tobacco/health\\_priority/en/](http://www.who.int/tobacco/health_priority/en/) Accessed on June 18, 2014.
3. Haddad L, El-Shahawy O, Shishani K, et al. Cigarette use attitudes and effects of acculturation among Arab immigrants in USA: A preliminary study. *Health* 2012;4(10):785-793.
4. Robles GI, Singh-Franco D, & Ghin HL. A review of the efficacy of smoking-cessation pharmacotherapies in nonwhite populations. *Clin Ther* 2008;30(5):800-12.
5. Okuyemi K, Nollen N, & Ahluwalia J. Interventions to Facilitate Smoking Cessation. *Am Fam Physician* 2006;74(2):262-271.
6. Health Canada. Canadian Tobacco Use Monitoring Survey (CTUMS) 2010. 2010. Available at [http://www.hc-sc.gc.ca/hc-ps/tobac-tabac/research-recherche/stat/ctums-esutc\\_2010\\_graph-eng.php](http://www.hc-sc.gc.ca/hc-ps/tobac-tabac/research-recherche/stat/ctums-esutc_2010_graph-eng.php) Accessed on July 2, 2014.
7. Yan J, Xiao S, Ouyang D, et al. Smoking behavior, knowledge, attitudes and practice among health care providers in Changsha city, China. *Nicotine Tob Res* 2008; 10: 737-744.
8. Wu D, Ma GX, Zhou K, et al. The effect of a culturally tailored smoking cessation for Chinese American smokers. *Nicotine Tob Res* 2009;11(12):1448-1457.
9. Chen W. *Susceptibility to Smoking among Chinese-Canadian Non-smoking Adolescents*. Doctoral Dissertation, University of British Columbia. 2008. Available at

1  
2  
3  
4  
5  
6  
7  
8  
9  
10  
11  
12  
13  
14  
15  
16  
17  
18  
19  
20  
21  
22  
23  
24  
25  
26  
27  
28  
29  
30  
31  
32  
33  
34  
35  
36  
37  
38  
39  
40  
41  
42  
43  
44  
45  
46  
47  
48  
49  
50  
51  
52  
53  
54  
55  
56  
57  
58  
59  
60

[https://circle.ubc.ca/bitstream/handle/2429/942/ubc\\_2008\\_fall\\_chen\\_weihong.pdf?sequence=1](https://circle.ubc.ca/bitstream/handle/2429/942/ubc_2008_fall_chen_weihong.pdf?sequence=1) Accessed on July 2, 2014.

10. Yang G, Ma J, Liu N, et al. Smoking and passive smoking in Chinese - 2002. *Zhonghua Liu Xing Bing Xue Za Zhi* 2005;26:77-83.
11. Ksal H, Sayg A, Sarıman N, et al. Evaluation of Clinical and Functional Parameters in Female Subjects With Biomass Smoke Exposure. *Respir Care* 2013;58(3):424-430.
12. Statistics Canada. Some facts about the demographic and ethnocultural composition of the population. 2008. Available at <http://www.statcan.gc.ca/pub/91-003-x/2007001/4129904-eng.htm#2> Accessed on July 2, 2014.
13. BC Statistics. Population Estimates - Total Populations. 2010. Available at: <http://www.bcstats.gov.bc.ca/data/pop/pop/estspop.asp#totpop> Accessed on July 2, 2014.
14. Zeng XX, Chiu CH, Sun J, et al. A Phone-Counseling Smoking-Cessation Intervention for Male Chinese Restaurant Workers. *J Commun Health* 2010(3):1-12.
15. Gallup World. Three in 10 Chinese Adults Smoke. 2012. Available at: <http://www.gallup.com/poll/152546/three-chinese-adults-smoke.aspx> Accessed on July 2, 2014.
16. World Health Organization. Tobacco in China. Western Pacific Region. 2014. Available at: <http://www.wpro.who.int/china/mediacentre/factsheets/tobacco/en/> Accessed on June 20, 2014.
17. Poureslami I, Doyle-Waters MMR, Nimmon L, et al. Hearing the community voice: methodological issues in developing asthma self-management educational materials for immigrant communities. In Agyemang C, Airhihenbuwa CO, de-Graft Aikins A (eds.),

1  
2  
3 *Ethnicity: Theories, International Perspectives and Challenges*. Hauppauge NY: Nova  
4  
5 Publishers 2014:125-156.  
6  
7

- 8 **18.** Faridi Z, Grunbaum JA, Gray BS, et al. 2007. Community-based participatory research:  
9  
10 necessary next steps. *Prev Chronic Dis*. Available at: <http://www.cdc.gov/pcd/>  
11  
12 [issues/2007/jul/06\\_0182.htm](http://www.cdc.gov/pcd/issues/2007/jul/06_0182.htm) Accessed on June 21, 2014.  
13  
14
- 15 **19.** Israel BA, Schulz AJ, Parker EA, et al. Review of community-based research: assessing  
16  
17 partnership approaches to improve public. *Annu.Rev.Public Health*.1998;19:173–202.  
18  
19
- 20 **20.** Poureslami I, Shum J, Cheng N, et al. Does Culture or Illness Change a Smoker’s  
21  
22 Perspective on Cessation? *Am J Health Behav* 2014;38(5):33-39.  
23  
24
- 25 **21.** Poureslami I, Shum J, & FitzGerald JM. Differences in attitudes and beliefs about  
26  
27 smoking among smoker and ex-smoker COPD patients. *J Health Care Poor* 2014 (Under  
28  
29 review).  
30  
31
- 32 **22.** Poureslami I, Rootman I, Doyle-Water MMR, et al. Health literacy, language, and  
33  
34 ethnicity-related factors in newcomer asthma patients to Canada: a qualitative study. *J*  
35  
36 *Immigr Minor Health*.2011;13(2):315-322.  
37  
38
- 39 **23.** Klassen AF, Gulati S, Watt L, et al. Immigrant to Canada, newcomer to childhood  
40  
41 cancer: a qualitative study of challenges faced by immigrant parents. *Psycho-oncol*  
42  
43 2012;21(5):558-562.  
44  
45
- 46 **24.** Scarinci IC, Silveira AF, Figueiredo dos Santos D, Beech BM. Sociocultural factors  
47  
48 associated with cigarette smoking among women in Brazilian worksites: a qualitative  
49  
50 study. *Health Promot. Int.* (2007) 22 (2): 146-154.  
51  
52  
53  
54  
55  
56



- 1  
2  
3  
4  
5  
6  
7  
8  
9  
10  
11  
12  
13  
14  
15  
16  
17  
18  
19  
20  
21  
22  
23  
24  
25  
26  
27  
28  
29  
30  
31  
32  
33  
34  
35  
36  
37  
38  
39  
40  
41  
42  
43  
44  
45  
46  
47  
48  
49  
50  
51  
52  
53  
54  
55  
56  
57  
58  
59  
60
25. Dawson AP, Cargo M, Stewart H, et al. Aboriginal Health Workers experience multilevel barriers to quitting smoking: a qualitative study. *Int J Equity Health* 2012;11: 27.
26. North American Quitline Consortium (NAQC). The Use of Quitlines among Priority Populations in the U.S.: Lessons from the Scientific Evidence. 2011. Available at: [http://c.ymcdn.com/sites/www.naquitline.org/resource/resmgr/Issue\\_Papers/IssuePaperTheUseofQuitlinesA.pdf](http://c.ymcdn.com/sites/www.naquitline.org/resource/resmgr/Issue_Papers/IssuePaperTheUseofQuitlinesA.pdf) Accessed on July 15, 2014.
27. Maryland Department of Health and Mental Hygiene. Exploring cultural, psychosocial, and environmental factors influencing tobacco use among Asian Americans, Hispanics, African Americans and American Indians in Maryland. Cigarette Restitution Fund's Tobacco Use Prevention and Cessation Program. 2008. Available at: [https://sph.umd.edu/epib/cultural\\_competency/Exploring%20cultural,%20psychosocial,%20and%20environmental%20factors%20influencing%20tobacco%20use%20among%20Asian%20Americans,%20Hispanics,%20African%20Americans%20and%20American%20Indians%20in%20Maryland.pdf](https://sph.umd.edu/epib/cultural_competency/Exploring%20cultural,%20psychosocial,%20and%20environmental%20factors%20influencing%20tobacco%20use%20among%20Asian%20Americans,%20Hispanics,%20African%20Americans%20and%20American%20Indians%20in%20Maryland.pdf) Accessed on July 15, 2014.
28. Binnal A, Rajesh G, Ahmed J, et al. Insights into Smoking and its Cessation among Current Smokers in India. *Asian Pacific J Cancer Prev.* 2013; 14 (5): 2811-2818.

- 1  
2  
3  
4  
5  
6  
7  
8  
9  
10  
11  
12  
13  
14  
15  
16  
17  
18  
19  
20  
21  
22  
23  
24  
25  
26  
27  
28  
29  
30  
31  
32  
33  
34  
35  
36  
37  
38  
39  
40  
41  
42  
43  
44  
45  
46  
47  
48  
49  
50  
51  
52  
53  
54  
55  
56  
57  
58  
59  
60
29. Yang J, Hammond D, Driezen P, et al. Health knowledge and perception of risks among Chinese smokers and non-smokers: Findings from the Wave 1 ITC China Survey. *Tob Control* 2010;19(Supplement 2):i18-i23.
30. Siahpush M, McNeill A, Hammond D, Fong GT. Socioeconomic and country variations in knowledge of health risks of tobacco smoking and toxic constituents of smoke: results from the 2002 International Tobacco Control (ITC) Four Country Survey. *Tobacco Control* 2006; 15(Suppl III):iii65–iii70. doi: 10.1136/tc.2005.013276.
31. Oncken C, McKee S, Krishnan-Sarin S, et al. Knowledge and perceived risk of smoking-related conditions: a survey of cigarette smokers. *Preventive Medicine*. 2005; 40: 779–784.
32. Roddy E, Antoniak M, Britton J, et al. Barriers and motivators to gaining access to smoking cessation services amongst deprived smokers – a qualitative study. *BMC Health Services Research* 2006;6:147-154.
33. Litmus research organization. Quitting Motivations and Barriers Qualitative Research. The Quit Group. 2005. Available at:  
<http://www.quit.org.nz/file/research/FINAL%20Litmus%20report-Quitting%20Motivations%20and%20Barriers.pdf> Accessed on July 15, 2014.

- 1  
2  
3  
4  
5  
6  
7  
8  
9  
10  
11  
12  
13  
14  
15  
16  
17  
18  
19  
20  
21  
22  
23  
24  
25  
26  
27  
28  
29  
30  
31  
32  
33  
34  
35  
36  
37  
38  
39  
40  
41  
42  
43  
44  
45  
46  
47  
48  
49  
50  
51  
52  
53  
54  
55  
56  
57  
58  
59  
60
- 34.** Richardson K. Smoking, Low Income and Health Inequalities: Thematic Discussion Document. Action on Smoking and Health and the Health Development Agency. 2001. Available at: [http://www.ash.org.uk/files/documents/ASH\\_86.pdf](http://www.ash.org.uk/files/documents/ASH_86.pdf) Accessed on July 15, 2014.
- 35.** Gwaltney CJ, Metrik J, Kahler CW, Shiffman S. Self-Efficacy and Smoking Cessation: A Meta-Analysis. *Psychol Addict Behav* 2009;23(1):1-20.
- 36.** Dijkstra A, & De Vries H. Self-efficacy expectations with regard to different tasks in smoking cessation. *Psychol Health* 2000;15(4):501-511.
- 37.** Song AV, Morrell HE, Cornell JL, et al. Perceptions of Smoking-Related Risks and Benefits as Predictors of Adolescent Smoking Initiation. *Am J Public Health* 2009;99(3):487-492.
- 38.** Aryal UR, Petzold M, & Krettek A. Perceived risks and benefits of cigarette smoking among Nepalese adolescents: a population-based cross-sectional study. *BMC Public Health* 2013,13:187-196.
- 39.** Harris JK, Karamehic-Muratovic A, Herbers SH, et al. Perceptions of Personal Risk About Smoking and Health Among Bosnian Refugees Living in The United States. *J Immigrant Minority Health* 2012;14(3):413-919.



**The effect of a multi-dimensional smoking cessation intervention on Mandarin and Cantonese-speaking immigrants residing in the Greater Vancouver Area: A community-based program**

Please respond to the following questions:

**A. All about you**

**1. What is your gender?**

- Male  Female

**2. What is your age?**

- 21-25 years old  
 26-35 years old  
 36-45 years old  
 46-55 years old  
 56 years old and above

**3. Which language(s) do you speak most with your friends, family, or co-workers?**

- Mandarin  
 Cantonese  
 English  
 Others, please specify \_\_\_\_\_

**4. What is your marital status?**

- Single, never married  
 Married  
 Living under common-law  
 Divorced  
 Widowed/Living alone

**5. What is your highest level of education?**

- Never attended school  
 Elementary school  
 High school  
 University degree  
 University degree and above  
 Others, please specify \_\_\_\_\_

**6. What is your current employment status?**

- I am a student  
 I am employed  
 I am self-employed  
 I am unemployed  
 I am retired



## B. Smoking onset questions

### 1. At what age did you start smoking?

- Under 18 years old
- 19-25 years old
- 26-39 years old
- 40 years old and older

### 2. Why did you start smoking? (Choose all that are applicable to you and explain)

- Social factors, please specify \_\_\_\_\_

- Emotional factors, please specify \_\_\_\_\_

- Environmental factors, please specify \_\_\_\_\_

- Others, please specify \_\_\_\_\_

### 3. At the time you started smoking, did somebody in your social network smoke?

(Choose all that are applicable to you)

- None or Not applicable
- Family, who, please specify \_\_\_\_\_
- Colleagues, from where, please specify \_\_\_\_\_
- Friends
- Classmates, at what age, please specify \_\_\_\_\_
- Others, please specify \_\_\_\_\_

### 4. At the time you started smoking, did somebody tell you about the health problems smoking a cigarette can cause?

(Choose all that are applicable to you)

- None or Not applicable
- Family, who, please specify \_\_\_\_\_
- Colleagues
- Friends
- Classmates, at what age, please specify \_\_\_\_\_
- Media
- Health professionals
- Others, please specify \_\_\_\_\_

### 5. At the time you started smoking, did you know the side effects of smoking?

- Yes       No

**If yes, which one(s) did you know?**

- Makes teeth yellow
- Causes wrinkles



- Makes smokers smell bad
- Causes more phlegm
- Shortness of breath
- Causes bad breath
- Cough
- Increased risk of lung cancer
- Greater risk of heart disease
- Others, please specify \_\_\_\_\_

**6. Why did you become a regular smoker?**

**(Choose all that are applicable to you)**

- I have never been a regular smoker (**After choosing, please skip to question 7**)
- I craved cigarettes if I didn't smoke regularly
- I was around smokers a lot of time
- I found smoking pleasurable
- I enjoy the taste
- Smoking relaxed me
- Smoking helped me focus and concentrate better
- Smoking helped me feel less stressed
- I smoke to fit in with other people
- I like the image of a smoker
- Smoking helped me control my weight
- Since others in my family smoked, it was easy to see myself as a smoker too
- Others, please specify \_\_\_\_\_

**7. If you are not a regular smoker, why didn't you become a regular smoker?**

**(Choose all that are applicable to you)**

- I did not enjoy smoking
- Smoking cigarettes made me feel sick
- I did not like the taste and/ or the smell of cigarettes
- I did not want to become addicted to cigarettes
- I was concerned about the effects of smoking on my health
- I was concerned about the effects of smoking on the health of the people around me
- I don't hang out with people who are smokers that often
- I was encouraged to stop smoking by my friends
- I was encouraged to stop smoking by an adult such as my parents/ guardians, a teacher, or a doctor
- I did not like the image of being a smoker
- It was hard for me to obtain cigarettes
- Cigarettes are expensive
- I had trouble finding places to smoke
- Since I grew up in a non-smoking family, I just could not see myself as a smoker
- I don't want people to know that I smoke
- Others, please specify \_\_\_\_\_



### C. Which characteristic best describes you as a smoker?

#### 1. How much do you smoke now per day?

# Packs \_\_\_\_\_ or # Cigarettes \_\_\_\_\_

#### 2. How much do you spend weekly on buying cigarettes?

- Under \$25/week
- \$25-50/week
- \$50-75/week
- \$75-100/week
- \$101+/week

#### 3. I have a smoking routine/pattern.

- True
- False
- Not sure

#### 4. I smoke

(Choose all that are applicable to you)

- When I am bored
- When I am upset
- When I am having a break
- When I am partying
- When I am driving
- When I am under stress
- When I am with friends
- When I am alone
- When I am in a social gathering
- Mostly at home
- At work or at school
- When I have alcohol
- First thing when I wake up
- Mostly in the morning
- Mostly in the afternoon
- At night before I head to bed
- After every meal
- After every tea or coffee
- During every phone conversation
- Before I go to the washroom
- Before I head to work on an assignment/task
- After I finish an assignment/task
- When I want to relax
- Others, please specify \_\_\_\_\_

#### 5. There is a different feeling when comparing times I smoke and don't smoke.

- True
- False
- Not sure
- Depends on the situation, please explain \_\_\_\_\_



1  
2  
3  
4  
5  
6  
7  
8  
9  
10  
11  
12  
13  
14  
15  
16  
17  
18  
19  
20  
21  
22  
23  
24  
25  
26  
27  
28  
29  
30  
31  
32  
33  
34  
35  
36  
37  
38  
39  
40  
41  
42  
43  
44  
45  
46  
47  
48  
49  
50  
51  
52  
53  
54  
55  
56  
57  
58  
59  
60

**6. What are the things you like about smoking?**

**(Choose all that are applicable to you)**

- It helps me to relax
- It helps to break up my working time
- It helps me to cope with stress
- It keeps me busy when I am bored
- I just enjoy it
- It is something I have in common with my friends or family
- It stops me from putting on weight

**7. What are the things you don't like about your smoking?**

- I don't have anything that I dislike about smoking
- It is expensive
- It affects my health
- I don't like feeling dependent on cigarettes
- It makes my clothes and breath smell
- It is a bad example for children
- It is unpleasant for people near me
- It makes me less fit
- People put a negative image on me
- It is bad for the health of people near me

**8. Certain situations trigger me to smoke**

- True     False     Not sure

**If true, what are the situations?**

- Happiness/ Joy
- Relaxed
- Social gathering
- Receive bad news
- Receive good news
- Stress
- Frustration
- Boredom
- Loneliness
- Anger
- Sadness
- Lost concentration
- Wanting to be like others (e.g., friends, members of my group)
- Other, please specify \_\_\_\_\_

**9. Where do you smoke mostly?**

- Indoors
- Porch/outside of home
- Outside
- Workplace
- In the car
- Others, please specify \_\_\_\_\_





#### D. Your perception about the following statement

**1. Smoking kills germs and bacteria.**

True     False     Not sure

**2. My body needs nicotine.**

True     False     Not sure

**3. Smoking is an addiction.**

True     False     Not sure

**4. Smoking is cool.**

True     False     Not sure

**5. Smoking has changed my daily routine (work, study, exercise, food intake, and sleep).**

True     False     Not sure

**If true, how has it changed your daily routine?**

---

**6. Smoking has affected my health (i.e., lung disease, coughing, phlegm, cancer, shortness of breath, heart disease, blood pressure, energy, wrinkles, asthma)?**

True     False     Not sure

**If true, how has it affected your health?**

---

**7. There are health-related problems I'm worried about while I smoke.**

True     False     Not sure

**If true, what are they?**

Lung disease

Shortness of breath

Cough

Cancer

Heart disease

Change in blood pressure

Less energized

Dependence on medication intake

Decrease in oxygen intake

Wrinkles

Early death

Others, please specify \_\_\_\_\_

**8. What do you think are the advantages of you smoking cigarettes?**

---

**9. What do you think are the disadvantages of you smoking cigarettes?**

---



1  
2  
3  
4  
5  
6  
7  
8  
9  
10  
11  
12  
13  
14  
15  
16  
17  
18  
19  
20  
21  
22  
23  
24  
25  
26  
27  
28  
29  
30  
31  
32  
33  
34  
35  
36  
37  
38  
39  
40  
41  
42  
43  
44  
45  
46  
47  
48  
49  
50  
51  
52  
53  
54  
55  
56  
57  
58  
59  
60

**10. Do you have any other feelings about you smoking cigarettes?**

---

**E. Your experience and thoughts on quitting and quitting methods**

**1. I was nagged by someone to quit smoking.**

True  False

**If true, who nagged you?**

---

**2. I have gone to the doctor for symptoms related to my lungs.**

True  False  Not related to my smoking

**3. I have had a lung examination at the physician's office or hospital.**

True  False  Not related to my smoking

**4. I have tried to quit before.**

True  False

**If true, how many times have you tried?** \_\_\_\_\_

**What methods did you try?**

---

**What was the longest duration you were able to quit for?**

---

**Why couldn't you quit?**

---

**5. Where have you received or heard of smoking cessation methods?**

**(Choose all that are applicable to you)**

- I never heard about or received any information  
 Family or friends  
 Hospitals/clinics  
 Pharmacy  
 Media  
 Others, please specify \_\_\_\_\_

**6. I have thought about cutting down my cigarette intake before.**

True  False  Not sure

**If true, what was your reason to cut down?**

---

**If true, has your intake of cigarettes cut down now?**  Yes  No

**7. I have tried nicotine replacement therapy.**

True  False  Not sure what nicotine is

**If true, did it work? Why or why not?**

---



---



**8. I have thought about (intention) quitting before.**

- True     False     Not sure

**If true, what was your reason for quitting?**

---

**If false, what was the reason for not quitting?**

---

**9. I have met difficulty in quitting before.**

- True     False     Not applicable

**If true, what was your difficulty?**

- I enjoy smoking too much  
 I don't think I have enough willpower  
 I think I would put on weight  
 I would be too stressed  
 I think I am too addicted to cigarettes  
 My partner smokes  
 My best friend smoke  
 I would miss smoking with friends  
 I don't really want to stop  
 I would be bored  
 I would miss smoking breaks at work  
 Others, please specify \_\_\_\_\_

**10. In your opinion, what are the withdrawal symptoms due to quitting?**

- 
- I don't know what the withdrawal symptoms are.

**11. I would benefit more from smoking than suffering from withdrawal symptoms due to quitting.**

- True     False     Not sure

**If true, why is it?**

**12. There are people that support me for quitting.**

- True     False     Not sure     Not applicable

**If true, who supports you?**

---

**If true, what kinds of support did they provide you?**

---

**13. I would consider quitting in the future.**

- True     False     Not sure

**If true, what would be your reason for quitting in the future?**

---

**If true, what immediate reward would you like to get?**

---

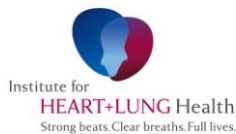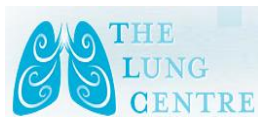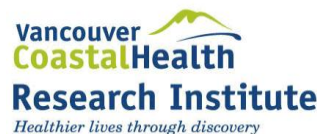

1  
2  
3  
4  
5  
6  
7  
8  
9  
10  
11  
12  
13  
14  
15  
16  
17  
18  
19  
20  
21  
22  
23  
24  
25  
26  
27  
28  
29  
30  
31  
32  
33  
34  
35  
36  
37  
38  
39  
40  
41  
42  
43  
44  
45  
46  
47  
48  
49  
50  
51  
52  
53  
54  
55  
56  
57  
58  
59  
60

14. I would quit smoking if people I spend time with quit also.

True     False     Not sure

If true, why?

---

15. I will be able to quit whenever I want.

True     False     Not sure

16. If you were to quit, what would be the most influential motivation?

---

17. What positive feelings would most help you in becoming a non-smoker?  
(Choose all that are applicable to you)

Confidence

Determination

Calm

Relaxation

Caring about myself

Caring about others

Others, please specify \_\_\_\_\_

18. Imagine that you are now a former smoker:

a) What could you do with the money you save?

---

b) How would your medication be different, if you are currently taking medication?

---

c) What would be your energy level?

---

d) What would be the quality of your life?

---

e) How would you be feeling physically as a non-smoker?

---

#### F. Your relationship with others

1. My smoking behaviour has changed my relationship with others. (Family, co-workers, classmates, and friends)

True     False     Not sure

If true, how has it changed your relationship with others?

---

2. Which people, or organization that you know, would approve of you smoking cigarettes?

---

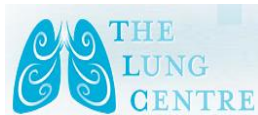

3. Which people, or organization that you know, would disapprove of you smoking cigarettes?

---

4. I would encourage others (Family, co-workers, classmates, and friends) to smoke.

True     False     Not sure

If true, why would you encourage others to smoke?

---

If false, why would you not encourage others to smoke?

---

5. I would encourage others to quit.

True     False     Not sure

If true, what do you think is the best model to encourage people in your age group to quit?

---

6. I mind smoking in front of non-smokers.

True     False     Not sure

If true, why would you not smoke in front of non-smokers?

---

7. I mind smoking in front of young children.

True     False     Not sure

If true, why would you not smoke in front of young children?

---

8. I think second and third hand smoke is not as harmful as first hand smoke.

True     False     I don't know what third hand smoke is

#### G. Cultural and environmental influences for your desire to smoke or to quit

1. Media such as visual warnings on cigarette packages has influenced me to quit smoking.

True     False     Not sure     Not applicable

2. Living in Canada has influenced my smoking habits or desire to quit.

True     False     Not sure

If true, how has it influenced your smoking habits or desire to quit?

---



1  
2  
3  
4  
5  
6  
7  
8  
9  
10  
11  
12  
13  
14  
15  
16  
17  
18  
19  
20  
21  
22  
23  
24  
25  
26  
27  
28  
29  
30  
31  
32  
33  
34  
35  
36  
37  
38  
39  
40  
41  
42  
43  
44  
45  
46  
47  
48  
49  
50  
51  
52  
53  
54  
55  
56  
57  
58  
59  
60

3. The different social norms in Canada have influenced my smoking behaviour in comparison to my native country.

True  False  Not sure

If true, how has it influenced your smoking behaviour in comparison to your native country?

---

4. In your culture, smoking is a behaviour that one gender engages in more than other.

True  False  Not sure

If true, which gender?

Male  Female

5. In your culture, smoking is a behaviour that a certain career profession engages in more than other.

True  False  Not sure

If true, which career profession?

---

6. People do not accept the smoking habit in my culture.

True  False  Not sure

If true, why do they not accept the smoking habit?

---

7. Most people in my culture smoke.

True  False  Not sure

8. What is your image of a smoker? Do you think it is a positive or negative image?

Positive image  Negative image  Not sure

Why? Please explain.

---

9. In your opinion, how can a smoker harm or benefit the society?

---

10. In your opinion, what would be a good enforcement to stop the younger generation from smoking?

---

11. In your opinion, what should be the role of mass media?

---

12. What do you know about a cigarette? What does it do to the human body?

---

## STROBE Statement—checklist of items that should be included in reports of observational studies

|                              | Item No | Recommendation                                                                                                                                                                                                                                                                                                                                                                                                                                                                                                                                                                                                                                                                                   |
|------------------------------|---------|--------------------------------------------------------------------------------------------------------------------------------------------------------------------------------------------------------------------------------------------------------------------------------------------------------------------------------------------------------------------------------------------------------------------------------------------------------------------------------------------------------------------------------------------------------------------------------------------------------------------------------------------------------------------------------------------------|
| <b>Title and abstract</b>    | 1       | (a) Indicate the study's design with a commonly used term in the title or the abstract<br>(b) Provide in the abstract an informative and balanced summary of what was done and what was found                                                                                                                                                                                                                                                                                                                                                                                                                                                                                                    |
| <b>Introduction</b>          |         |                                                                                                                                                                                                                                                                                                                                                                                                                                                                                                                                                                                                                                                                                                  |
| Background/rationale         | 2       | Explain the scientific background and rationale for the investigation being reported                                                                                                                                                                                                                                                                                                                                                                                                                                                                                                                                                                                                             |
| Objectives                   | 3       | State specific objectives, including any prespecified hypotheses                                                                                                                                                                                                                                                                                                                                                                                                                                                                                                                                                                                                                                 |
| <b>Methods</b>               |         |                                                                                                                                                                                                                                                                                                                                                                                                                                                                                                                                                                                                                                                                                                  |
| Study design                 | 4       | Present key elements of study design early in the paper                                                                                                                                                                                                                                                                                                                                                                                                                                                                                                                                                                                                                                          |
| Setting                      | 5       | Describe the setting, locations, and relevant dates, including periods of recruitment, exposure, follow-up, and data collection                                                                                                                                                                                                                                                                                                                                                                                                                                                                                                                                                                  |
| Participants                 | 6       | (a) <i>Cohort study</i> —Give the eligibility criteria, and the sources and methods of selection of participants. Describe methods of follow-up<br><i>Case-control study</i> —Give the eligibility criteria, and the sources and methods of case ascertainment and control selection. Give the rationale for the choice of cases and controls<br><i>Cross-sectional study</i> —Give the eligibility criteria, and the sources and methods of selection of participants<br>(b) <i>Cohort study</i> —For matched studies, give matching criteria and number of exposed and unexposed<br><i>Case-control study</i> —For matched studies, give matching criteria and the number of controls per case |
| Variables                    | 7       | Clearly define all outcomes, exposures, predictors, potential confounders, and effect modifiers. Give diagnostic criteria, if applicable                                                                                                                                                                                                                                                                                                                                                                                                                                                                                                                                                         |
| Data sources/<br>measurement | 8*      | For each variable of interest, give sources of data and details of methods of assessment (measurement). Describe comparability of assessment methods if there is more than one group                                                                                                                                                                                                                                                                                                                                                                                                                                                                                                             |
| Bias                         | 9       | Describe any efforts to address potential sources of bias                                                                                                                                                                                                                                                                                                                                                                                                                                                                                                                                                                                                                                        |
| Study size                   | 10      | Explain how the study size was arrived at                                                                                                                                                                                                                                                                                                                                                                                                                                                                                                                                                                                                                                                        |
| Quantitative variables       | 11      | Explain how quantitative variables were handled in the analyses. If applicable, describe which groupings were chosen and why                                                                                                                                                                                                                                                                                                                                                                                                                                                                                                                                                                     |
| Statistical methods          | 12      | (a) Describe all statistical methods, including those used to control for confounding<br>(b) Describe any methods used to examine subgroups and interactions<br>(c) Explain how missing data were addressed<br>(d) <i>Cohort study</i> —If applicable, explain how loss to follow-up was addressed<br><i>Case-control study</i> —If applicable, explain how matching of cases and controls was addressed<br><i>Cross-sectional study</i> —If applicable, describe analytical methods taking account of sampling strategy<br>(e) Describe any sensitivity analyses                                                                                                                                |

Continued on next page

**Results**

|                  |     |                                                                                                                                                                                                                                                                                                                                                                                                               |
|------------------|-----|---------------------------------------------------------------------------------------------------------------------------------------------------------------------------------------------------------------------------------------------------------------------------------------------------------------------------------------------------------------------------------------------------------------|
| Participants     | 13* | (a) Report numbers of individuals at each stage of study—eg numbers potentially eligible, examined for eligibility, confirmed eligible, included in the study, completing follow-up, and analysed<br>(b) Give reasons for non-participation at each stage<br>(c) Consider use of a flow diagram                                                                                                               |
| Descriptive data | 14* | (a) Give characteristics of study participants (eg demographic, clinical, social) and information on exposures and potential confounders<br>(b) Indicate number of participants with missing data for each variable of interest<br>(c) <i>Cohort study</i> —Summarise follow-up time (eg, average and total amount)                                                                                           |
| Outcome data     | 15* | <i>Cohort study</i> —Report numbers of outcome events or summary measures over time<br><i>Case-control study</i> —Report numbers in each exposure category, or summary measures of exposure<br><i>Cross-sectional study</i> —Report numbers of outcome events or summary measures                                                                                                                             |
| Main results     | 16  | (a) Give unadjusted estimates and, if applicable, confounder-adjusted estimates and their precision (eg, 95% confidence interval). Make clear which confounders were adjusted for and why they were included<br>(b) Report category boundaries when continuous variables were categorized<br>(c) If relevant, consider translating estimates of relative risk into absolute risk for a meaningful time period |
| Other analyses   | 17  | Report other analyses done—eg analyses of subgroups and interactions, and sensitivity analyses                                                                                                                                                                                                                                                                                                                |

**Discussion**

|                  |    |                                                                                                                                                                            |
|------------------|----|----------------------------------------------------------------------------------------------------------------------------------------------------------------------------|
| Key results      | 18 | Summarise key results with reference to study objectives                                                                                                                   |
| Limitations      | 19 | Discuss limitations of the study, taking into account sources of potential bias or imprecision. Discuss both direction and magnitude of any potential bias                 |
| Interpretation   | 20 | Give a cautious overall interpretation of results considering objectives, limitations, multiplicity of analyses, results from similar studies, and other relevant evidence |
| Generalisability | 21 | Discuss the generalisability (external validity) of the study results                                                                                                      |

**Other information**

|         |    |                                                                                                                                                               |
|---------|----|---------------------------------------------------------------------------------------------------------------------------------------------------------------|
| Funding | 22 | Give the source of funding and the role of the funders for the present study and, if applicable, for the original study on which the present article is based |
|---------|----|---------------------------------------------------------------------------------------------------------------------------------------------------------------|

\*Give information separately for cases and controls in case-control studies and, if applicable, for exposed and unexposed groups in cohort and cross-sectional studies.

**Note:** An Explanation and Elaboration article discusses each checklist item and gives methodological background and published examples of transparent reporting. The STROBE checklist is best used in conjunction with this article (freely available on the Web sites of PLoS Medicine at <http://www.plosmedicine.org/>, Annals of Internal Medicine at <http://www.annals.org/>, and Epidemiology at <http://www.epidem.com/>). Information on the STROBE Initiative is available at [www.strobe-statement.org](http://www.strobe-statement.org).
