# Supplementary material for: Assessing beliefs and risk perceptions on smoking and smoking cessation in immigrant Chinese adult smokers residing in Vancouver, Canada: a cross-sectional study
Source: HighWire-hosted journal article supplement (doi:10.1136/bmjopen-2014-006435), 2015-02-01
Supplement: bmjopen-2014-006435supp.pdf [file bmjopen-2014-006435supp.pdf]

**The effect of a multi-dimensional smoking cessation intervention on Mandarin and Cantonese-speaking immigrants residing in the Greater Vancouver Area: A community-based program**

Please respond to the following questions:

**A. All about you**

**1. What is your gender?**

- ☐ Male      ☐ Female

**2. What is your age?**

- ☐ 21-25 years old  
☐ 26-35 years old  
☐ 36-45 years old  
☐ 46-55 years old  
☐ 56 years old and above

**3. Which language(s) do you speak most with your friends, family, or co-workers?**

- ☐ Mandarin  
☐ Cantonese  
☐ English  
☐ Others, please specify \_\_\_\_\_

**4. What is your marital status?**

- ☐ Single, never married  
☐ Married  
☐ Living under common-law  
☐ Divorced  
☐ Widowed/Living alone

**5. What is your highest level of education?**

- ☐ Never attended school  
☐ Elementary school  
☐ High school  
☐ University degree  
☐ University degree and above  
☐ Others, please specify \_\_\_\_\_

**6. What is your current employment status?**

- ☐ I am a student  
☐ I am employed  
☐ I am self-employed  
☐ I am unemployed  
☐ I am retired

## B. Smoking onset questions

### 1. At what age did you start smoking?

- ☐ Under 18 years old
- ☐ 19-25 years old
- ☐ 26-39 years old
- ☐ 40 years old and older

### 2. Why did you start smoking? (Choose all that are applicable to you and explain)

- ☐ Social factors, please specify \_\_\_\_\_

- ☐ Emotional factors, please specify \_\_\_\_\_

- ☐ Environmental factors, please specify \_\_\_\_\_

- ☐ Others, please specify \_\_\_\_\_

### 3. At the time you started smoking, did somebody in your social network smoke?

(Choose all that are applicable to you)

- ☐ None or Not applicable
- ☐ Family, who, please specify \_\_\_\_\_
- ☐ Colleagues, from where, please specify \_\_\_\_\_
- ☐ Friends
- ☐ Classmates, at what age, please specify \_\_\_\_\_
- ☐ Others, please specify \_\_\_\_\_

### 4. At the time you started smoking, did somebody tell you about the health problems smoking a cigarette can cause?

(Choose all that are applicable to you)

- ☐ None or Not applicable
- ☐ Family, who, please specify \_\_\_\_\_
- ☐ Colleagues
- ☐ Friends
- ☐ Classmates, at what age, please specify \_\_\_\_\_
- ☐ Media
- ☐ Health professionals
- ☐ Others, please specify \_\_\_\_\_

### 5. At the time you started smoking, did you know the side effects of smoking?

- ☐ Yes
- ☐ No

If yes, which one(s) did you know?

- ☐ Makes teeth yellow
- ☐ Causes wrinkles

- ☐ Makes smokers smell bad
- ☐ Causes more phlegm
- ☐ Shortness of breath
- ☐ Causes bad breath
- ☐ Cough
- ☐ Increased risk of lung cancer
- ☐ Greater risk of heart disease
- ☐ Others, please specify\_\_\_\_\_

**6. Why did you become a regular smoker?**

**(Choose all that are applicable to you)**

- ☐ I have never been a regular smoker (**After choosing, please skip to question 7**)
- ☐ I craved cigarettes if I didn't smoke regularly
- ☐ I was around smokers a lot of time
- ☐ I found smoking pleasurable
- ☐ I enjoy the taste
- ☐ Smoking relaxed me
- ☐ Smoking helped me focus and concentrate better
- ☐ Smoking helped me feel less stressed
- ☐ I smoke to fit in with other people
- ☐ I like the image of a smoker
- ☐ Smoking helped me control my weight
- ☐ Since others in my family smoked, it was easy to see myself as a smoker too
- ☐ Others, please specify\_\_\_\_\_

**7. If you are not a regular smoker, why didn't you become a regular smoker?**

**(Choose all that are applicable to you)**

- ☐ I did not enjoy smoking
- ☐ Smoking cigarettes made me feel sick
- ☐ I did not like the taste and/ or the smell of cigarettes
- ☐ I did not want to become addicted to cigarettes
- ☐ I was concerned about the effects of smoking on my health
- ☐ I was concerned about the effects of smoking on the health of the people around me
- ☐ I don't hang out with people who are smokers that often
- ☐ I was encouraged to stop smoking by my friends
- ☐ I was encouraged to stop smoking by an adult such as my parents/ guardians, a teacher, or a doctor
- ☐ I did not like the image of being a smoker
- ☐ It was hard for me to obtain cigarettes
- ☐ Cigarettes are expensive
- ☐ I had trouble finding places to smoke
- ☐ Since I grew up in a non-smoking family, I just could not see myself as a smoker
- ☐ I don't want people to know that I smoke
- ☐ Others, please specify\_\_\_\_\_

**C. Which characteristic best describes you as a smoker?**

**1. How much do you smoke now per day?**

# Packs \_\_\_\_\_ or # Cigarettes \_\_\_\_\_

**2. How much do you spend weekly on buying cigarettes?**

- ☐ Under \$25/week
- ☐ \$25-50/week
- ☐ \$50-75/week
- ☐ \$75-100/week
- ☐ \$101+/week

**3. I have a smoking routine/pattern.**

- ☐ True      ☐ False      ☐ Not sure

**4. I smoke**

**(Choose all that are applicable to you)**

- ☐ When I am bored
- ☐ When I am upset
- ☐ When I am having a break
- ☐ When I am partying
- ☐ When I am driving
- ☐ When I am under stress
- ☐ When I am with friends
- ☐ When I am alone
- ☐ When I am in a social gathering
- ☐ Mostly at home
- ☐ At work or at school
- ☐ When I have alcohol
- ☐ First thing when I wake up
- ☐ Mostly in the morning
- ☐ Mostly in the afternoon
- ☐ At night before I head to bed
- ☐ After every meal
- ☐ After every tea or coffee
- ☐ During every phone conversation
- ☐ Before I go to the washroom
- ☐ Before I head to work on an assignment/task
- ☐ After I finish an assignment/task
- ☐ When I want to relax
- ☐ Others, please specify \_\_\_\_\_

**5. There is a different feeling when comparing times I smoke and don't smoke.**

- ☐ True      ☐ False      ☐ Not sure      ☐ Depends on the situation, please explain \_\_\_\_\_

**6. What are the things you like about smoking?**

**(Choose all that are applicable to you)**

- ☐ It helps me to relax
- ☐ It helps to break up my working time
- ☐ It helps me to cope with stress
- ☐ It keeps me busy when I am bored
- ☐ I just enjoy it
- ☐ It is something I have in common with my friends or family
- ☐ It stops me from putting on weight

**7. What are the things you don't like about your smoking?**

- ☐ I don't have anything that I dislike about smoking
- ☐ It is expensive
- ☐ It affects my health
- ☐ I don't like feeling dependent on cigarettes
- ☐ It makes my clothes and breath smell
- ☐ It is a bad example for children
- ☐ It is unpleasant for people near me
- ☐ It makes me less fit
- ☐ People put a negative image on me
- ☐ It is bad for the health of people near me

**8. Certain situations trigger me to smoke**

- ☐ True      ☐ False      ☐ Not sure

**If true, what are the situations?**

- ☐ Happiness/ Joy
- ☐ Relaxed
- ☐ Social gathering
- ☐ Receive bad news
- ☐ Receive good news
- ☐ Stress
- ☐ Frustration
- ☐ Boredom
- ☐ Loneliness
- ☐ Anger
- ☐ Sadness
- ☐ Lost concentration
- ☐ Wanting to be like others (e.g., friends, members of my group)
- ☐ Other, please specify\_\_\_\_\_

**9. Where do you smoke mostly?**

- ☐ Indoors
- ☐ Porch/outside of home
- ☐ Outside
- ☐ Workplace
- ☐ In the car
- ☐ Others, please specify\_\_\_\_\_

#### **D. Your perception about the following statement**

**1. Smoking kills germs and bacteria.**

☐ True      ☐ False      ☐ Not sure

**2. My body needs nicotine.**

☐ True      ☐ False      ☐ Not sure

**3. Smoking is an addiction.**

☐ True      ☐ False      ☐ Not sure

**4. Smoking is cool.**

☐ True      ☐ False      ☐ Not sure

**5. Smoking has changed my daily routine (work, study, exercise, food intake, and sleep).**

☐ True      ☐ False      ☐ Not sure

**If true, how has it changed your daily routine?**

---

**6. Smoking has affected my health (i.e., lung disease, coughing, phlegm, cancer, shortness of breath, heart disease, blood pressure, energy, wrinkles, asthma)?**

☐ True      ☐ False      ☐ Not sure

**If true, how has it affected your health?**

---

**7. There are health-related problems I'm worried about while I smoke.**

☐ True      ☐ False      ☐ Not sure

**If true, what are they?**

- ☐ Lung disease
- ☐ Shortness of breath
- ☐ Cough
- ☐ Cancer
- ☐ Heart disease
- ☐ Change in blood pressure
- ☐ Less energized
- ☐ Dependence on medication intake
- ☐ Decrease in oxygen intake
- ☐ Wrinkles
- ☐ Early death
- ☐ Others, please specify \_\_\_\_\_

**8. What do you think are the advantages of you smoking cigarettes?**

---

**9. What do you think are the disadvantages of you smoking cigarettes?**

---

**10. Do you have any other feelings about you smoking cigarettes?**

---

**E. Your experience and thoughts on quitting and quitting methods**

**1. I was nagged by someone to quit smoking.**

☐ True ☐ False

**If true, who nagged you?**

---

**2. I have gone to the doctor for symptoms related to my lungs.**

☐ True ☐ False ☐ Not related to my smoking

**3. I have had a lung examination at the physician's office or hospital.**

☐ True ☐ False ☐ Not related to my smoking

**4. I have tried to quit before.**

☐ True ☐ False

**If true, how many times have you tried?** \_\_\_\_\_

**What methods did you try?**

---

**What was the longest duration you were able to quit for?**

---

**Why couldn't you quit?**

---

**5. Where have you received or heard of smoking cessation methods?**

**(Choose all that are applicable to you)**

☐ I never heard about or received any information

☐ Family or friends

☐ Hospitals/clinics

☐ Pharmacy

☐ Media

☐ Others, please specify \_\_\_\_\_

**6. I have thought about cutting down my cigarette intake before.**

☐ True ☐ False ☐ Not sure

**If true, what was your reason to cut down?**

---

**If true, has your intake of cigarettes cut down now?** ☐ Yes ☐ No

**7. I have tried nicotine replacement therapy.**

☐ True ☐ False ☐ Not sure what nicotine is

**If true, did it work? Why or why not?**

---



---

**8. I have thought about (intention) quitting before.**

☐ True      ☐ False      ☐ Not sure

**If true, what was your reason for quitting?**

---

**If false, what was the reason for not quitting?**

---

**9. I have met difficulty in quitting before.**

☐ True      ☐ False      ☐ Not applicable

**If true, what was your difficulty?**

- ☐ I enjoy smoking too much
- ☐ I don't think I have enough willpower
- ☐ I think I would put on weight
- ☐ I would be too stressed
- ☐ I think I am too addicted to cigarettes
- ☐ My partner smokes
- ☐ My best friend smoke
- ☐ I would miss smoking with friends
- ☐ I don't really want to stop
- ☐ I would be bored
- ☐ I would miss smoking breaks at work
- ☐ Others, please specify \_\_\_\_\_

**10. In your opinion, what are the withdrawal symptoms due to quitting?**

---

☐ I don't know what the withdrawal symptoms are.

**11. I would benefit more from smoking than suffering from withdrawal symptoms due to quitting.**

☐ True      ☐ False      ☐ Not sure

**If true, why is it?**

---

**12. There are people that support me for quitting.**

☐ True      ☐ False      ☐ Not sure      ☐ Not applicable

**If true, who supports you?**

---

**If true, what kinds of support did they provide you?**

---

**13. I would consider quitting in the future.**

☐ True      ☐ False      ☐ Not sure

**If true, what would be your reason for quitting in the future?**

---

**If true, what immediate reward would you like to get?**

---

**14. I would quit smoking if people I spend time with quit also.**

☐ True    ☐ False    ☐ Not sure

**If true, why?**

---

**15. I will be able to quit whenever I want.**

☐ True    ☐ False    ☐ Not sure

**16. If you were to quit, what would be the most influential motivation?**

---

**17. What positive feelings would most help you in becoming a non-smoker?  
(Choose all that are applicable to you)**

- ☐ Confidence
- ☐ Determination
- ☐ Calm
- ☐ Relaxation
- ☐ Caring about myself
- ☐ Caring about others
- ☐ Others, please specify \_\_\_\_\_

**18. Imagine that you are now a former smoker:**

**a) What could you do with the money you save?**

---

**b) How would your medication be different, if you are currently taking medication?**

---

**c) What would be your energy level?**

---

**d) What would be the quality of your life?**

---

**e) How would you be feeling physically as a non-smoker?**

---

#### **F. Your relationship with others**

**1. My smoking behaviour has changed my relationship with others. (Family, co-workers, classmates, and friends)**

☐ True    ☐ False    ☐ Not sure

**If true, how has it changed your relationship with others?**

---

**2. Which people, or organization that you know, would approve of you smoking cigarettes?**

---

3. Which people, or organization that you know, would disapprove of you smoking cigarettes?
- 

4. I would encourage others (Family, co-workers, classmates, and friends) to smoke.

☐ True      ☐ False      ☐ Not sure

If true, why would you encourage others to smoke?

---

If false, why would you not encourage others to smoke?

---

5. I would encourage others to quit.

☐ True      ☐ False      ☐ Not sure

If true, what do you think is the best model to encourage people in your age group to quit?

---

6. I mind smoking in front of non-smokers.

☐ True      ☐ False      ☐ Not sure

If true, why would you not smoke in front of non-smokers?

---

7. I mind smoking in front of young children.

☐ True      ☐ False      ☐ Not sure

If true, why would you not smoke in front of young children?

---

8. I think second and third hand smoke is not as harmful as first hand smoke.

☐ True      ☐ False      ☐ I don't know what third hand smoke is

|                                                                                     |
|-------------------------------------------------------------------------------------|
| <b>G. Cultural and environmental influences for your desire to smoke or to quit</b> |
|-------------------------------------------------------------------------------------|

1. Media such as visual warnings on cigarette packages has influenced me to quit smoking.

☐ True      ☐ False      ☐ Not sure      ☐ Not applicable

2. Living in Canada has influenced my smoking habits or desire to quit.

☐ True      ☐ False      ☐ Not sure

If true, how has it influenced your smoking habits or desire to quit?

---

- 3. The different social norms in Canada have influenced my smoking behaviour in comparison to my native country.**

☐ True      ☐ False      ☐ Not sure

**If true, how has it influenced your smoking behaviour in comparison to your native country?**

---

- 4. In your culture, smoking is a behaviour that one gender engages in more than other.**

☐ True      ☐ False      ☐ Not sure

**If true, which gender?**

☐ Male      ☐ Female

- 5. In your culture, smoking is a behaviour that a certain career profession engages in more than other.**

☐ True      ☐ False      ☐ Not sure

**If true, which career profession?**

---

- 6. People do not accept the smoking habit in my culture.**

☐ True      ☐ False      ☐ Not sure

**If true, why do they not accept the smoking habit?**

---

- 7. Most people in my culture smoke.**

☐ True      ☐ False      ☐ Not sure

- 8. What is your image of a smoker? Do you think it is a positive or negative image?**

☐ Positive image      ☐ Negative image      ☐ Not sure

**Why? Please explain.**

---

- 9. In your opinion, how can a smoker harm or benefit the society?**
- 

- 10. In your opinion, what would be a good enforcement to stop the younger generation from smoking?**
- 

- 11. In your opinion, what should be the role of mass media?**
- 

- 12. What do you know about a cigarette? What does it do to the human body?**
-
